# Supplementary material for: Initiation rites at menarche and self-reported dysmenorrhoea among indigenous women of the Colombian Amazon: a cross-sectional study
Source: PubMed Central journal article supplement — BMJ Open. 2013 Mar 1;3(3):e002012. doi: 10.1136/bmjopen-2012-002012 (PMC3612793; doi:10.1136/bmjopen-2012-002012), 2013-03-01
Supplement: bmjopen-2012-002012.draft_revisions.pdf [file bmjopen-2012-002012.draft_revisions.pdf]

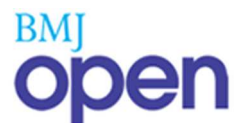

**INSIGHTS FROM INTER-CULTURAL EPIDEMIOLOGY: A  
CROSS-SECTIONAL STUDY OF DYSMENORRHOEA AND  
INITIATION RITES AMONG INDIGENOUS WOMEN OF THE  
COLOMBIAN AMAZON**

|                                 |                                                                                                                                                                                                 |
|---------------------------------|-------------------------------------------------------------------------------------------------------------------------------------------------------------------------------------------------|
| Journal:                        | <i>BMJ Open</i>                                                                                                                                                                                 |
| Manuscript ID:                  | bmjopen-2012-002012                                                                                                                                                                             |
| Article Type:                   | Research                                                                                                                                                                                        |
| Date Submitted by the Author:   | 27-Aug-2012                                                                                                                                                                                     |
| Complete List of Authors:       | Zuluaga, German; Universidad del Rosario, Escuela de Medicina; Cemi, General Direction<br>Andersson, Neil; Universidad Autónoma de Guerrero, Centro de Investigación de Enfermedades Tropicales |
| <b>Primary Subject Heading</b>: | Epidemiology                                                                                                                                                                                    |
| Secondary Subject Heading:      | Public health, Sexual health, Obstetrics and gynaecology                                                                                                                                        |
| Keywords:                       | Intercultural , Dysmenorrhoea, Medicine tradicional, Initiation rites                                                                                                                           |
|                                 |                                                                                                                                                                                                 |

SCHOLARONE™  
Manuscripts

1  
2  
3 **INSIGHTS FROM INTER-CULTURAL EPIDEMIOLOGY: A CROSS-SECTIONAL STUDY**  
4 **OF DYSMENORRHOEA AND INITIATION RITES AMONG INDIGENOUS WOMEN OF THE**  
5 **COLOMBIAN AMAZON**  
6  
7  
8  
9

10 Germán Zuluaga, calle 12 no. 3A-21 (Cota – Colombia, SA), gzuluaga@cemi.org.co, 57  
11 3132625103 and 57 1 8777040.  
12

13  
14  
15 Neil Andersson, Apdo 2-25 Acapulco México, andersson@ciet.org, 52 744 488 0012 and 52  
16 744 487 7230.  
17  
18  
19

20  
21  
22  
23 Germán Zuluaga, Escuela de Medicina y Ciencias de la Salud, Universidad del Rosario,  
24 Bogotá, Colombia.  
25  
26  
27

28  
29 Neil Andersson, Universidad Autónoma de Guerrero, Centro de Investigación de  
30 Enfermedades Tropicales, Acapulco, México.  
31  
32

33  
34 Keywords:

35 Intercultural

36  
37 Dysmenorrhoea

38  
39 Medicine, Traditional

40  
41 Initiation rites  
42  
43  
44

45 Word count: 2154  
46  
47  
48  
49  
50  
51  
52  
53  
54  
55  
56  
57  
58  
59  
60

## ABSTRACT

**Objectives:** Investigate the association between dysmenorrhoea and the decline of female initiation rites among Amazonian indigenous peoples of Vaupés in Colombia.

**Design:** Cross-sectional study of all women in seven indigenous communities. Questionnaire administered in local language documented female initiation rites and experience of dysmenorrhoea. Analysis examined ten initiation components separately, then together, comparing women who underwent all rites, some rites and no rites.

**Settings:** Seven indigenous communities belonging to the Tukano language group in the Great Eastern Reservation of Vaupés (Colombia) in 2009.

**Participants:** All women over the age of 13 years living in the seven communities in Vaupés, who had experienced at least two menstruations.

**Primary and secondary outcome measures:** The analysis rested on pelvic pain to define dysmenorrhoea as main outcome. Women were also asked about other disorders present during menstruation or the precedent days, and about the interval between menstruation and its duration.

**Results:** Only 17.3% (32/185) completed all initiation rites and 52.4% (97/185) reported dysmenorrhoea. Women not completing the rites were more likely to report dysmenorrhoea than those who did so ( $p=0.01$  Fisher exact), taking into account age, education, community, parity, and use of family planning. Women who completed less than the full complement of rites had higher risk than those who completed all rites. Those who did not complete all rites reported increased severity of dysmenorrhoea ( $p=0.00014$ ).

**Conclusions:** Our results are compatible with a protective effect of initiation rites. We could exclude indirect associations with age, education, parity and use of family planning as explanations for the association. The study indicates feasibility, possible utility and limits of inter-cultural epidemiology in small groups.

## Article summary

### Article focus

- Cross-sectional study 2009.
- Female initiation rites and dysmenorrhoea.

- 1  
2  
3 • Epidemiology and cultural safety.  
4

5 Key messages

- 6  
7 • Association between abandoning initiation rites and dysmenorrhoea.  
8  
9 • Suggests an effective traditional practice.  
10  
11 • Suggests feasibility and usefulness of intercultural epidemiology.  
12

13 Strengths and limitations of this study

- 14  
15 • No epidemiological studies of indigenous initiation and dysmenorrhoea.  
16  
17 • Even with all eligible women participating the small numbers problem is recognized.  
18  
19  
20  
21  
22  
23  
24  
25  
26  
27  
28  
29  
30  
31  
32  
33  
34  
35  
36  
37  
38  
39  
40  
41  
42  
43  
44  
45  
46  
47  
48  
49  
50  
51  
52  
53  
54  
55  
56  
57  
58  
59  
60

## INTRODUCTION

Qualitative research methods, like unstructured conversations, are relatively easily adapted to cultural contexts. This cultural adaptation is less common in epidemiology, which is often perceived as unreceptive to alternative epistemologies.[1] Yet inter-cultural epidemiology can be useful to identify potential health benefits of traditional health practices, many of which are being lost as globalization erodes indigenous cultures.

This loss of culture is a concern for Amazon indigenous communities, where every year people have less to do with traditional medical practices.[2] The Tatujo, Bará, Carapana, Tuyuca y Tukano ethnicities in Tukano language group live between the Papurí and Yapú rivers in the Great Eastern Reservation of Vaupés.[3, 4] In collective reservations, the seven communities with very similar customs in a subsistence economy.[5] In the context of a decade long partnership with the traditional health systems group at Universidad del Rosario in Colombia, the indigenous authorities of these communities requested scientific support to study their loss of cultural practices and the effect of this on women's reproductive health, particularly dysmenorrhoea.

Problems related to women's reproductive cycle are increasing worldwide.[6-8] Western medicine has few satisfactory solutions to offer women with dysmenorrhoea, offering an interesting case in point as the World Health Organization calls to explore possible contributions of traditional medicine.[9-11] A sparse epidemiological literature addresses the links with dysmenorrhoea and cultural influences,[12, 13] ethnicity and religiosity.[14, 15] Better documented risk factors are diet, exercise, psychological or emotional episodes, and use of alcohol and tobacco.[16-20] We found no epidemiological studies of indigenous initiation rites and dysmenorrhoea.

## METHODS

**Study population:** All women over the age of 13 years living in the seven communities in Vaupés, who had experienced at least two menstruations.

**Outcome:** Interviewers asked if, during menstruation, women suffered pelvic pain, dizziness, headache, bodily pains, and problems in the days prior to menstruation. They also asked about the interval between menstruation and duration of menstruation. The analysis rested on pelvic pain to define dysmenorrhoea.[21-23] Because pain perception is subjective, we used a well established graphic approach showing faces with different grades of discomfort (Figure 1).[24] Respondents simply pointed to the face that reflected their experience during menstruation.

1  
2  
3 **Exposure:** Traditional healers described initiation rites at the onset of menarche, lasting  
4 three to five days, during which time the young women completed a number of discrete  
5 activities: each initiate had a god-mother (*madrina*); each had a mentor during the initiation;  
6 the initiate spent 3-5 days away from others; she received a diet limited to specific foods; she  
7 received a blessing or prayer from the traditional healer; she applied powdered *carayurú*, a  
8 vegetable stain (*Arrhabidea chica*); her hair was cut; her body was painted with we, another  
9 vegetable stain (*Bignoniaceae sp.*); she inhaled ají, a hot spice mix (*Capsicum spp.*); and  
10 water or a plant precipitated emesis. The questionnaire documented exposure to each  
11 component rite (yes/no) separately. Without understanding the exact workings of the  
12 initiation rites, we followed the WHO guideline to handle the component activities as a “black  
13 box”[25]: we do not always have to understand exactly how a traditional therapy works to  
14 measure its effect.  
15  
16

17  
18  
19  
20  
21 **Instrument:** A month of consultation with local healers clarified the main research question  
22 and a list of culturally appropriate questions. After piloting, the authorities in each community  
23 invited all women – by cultural definition, the first menstruation identifies the woman as an  
24 adult -- to the communal hall (*maloka*) where the researchers explained the instrument,  
25 issues of confidentiality and the right to decline to participate or to leave out any question. No  
26 eligible woman declined to participate. Interviewers administered a 37-question instrument  
27 through a translator during December 2008.  
28  
29

30  
31  
32 **Analysis:** Epi-data 3.1 served for manual data capture analysis relied on CIETmap 2.0 beta  
33 8 (Community Information and Epidemiological Technologies, New York), public domain  
34 software that provides a Windows-like interface with R. Bivariate analysis with each of the 10  
35 component activities examined the relationship of each component rite on its own with  
36 dysmenorrhoea. We also analyzed complete and incomplete initiation using sequential  
37 stratification by age of the woman, community of origin (some had more access to Western  
38 ways), education, parity, family planning and menopause. We analysed trend using the  
39 Mantel extension of the Mantel-Haenszel test.[26] We report results as adjusted odds ratios  
40 (ORa) with 95% confidence intervals. The two-tailed Fisher exact test served for estimation  
41 of confidence with the resulting sparse numbers comparisons.  
42  
43

44  
45  
46  
47  
48 Without any prior basis for weighting importance of different activities in the initiation, we  
49 calculated the average effect across the ten components as though each was a separate  
50 exposure; this relied on Meta, an R program. A Forest plot summarises this (Figure 2).  
51 Compared with occurrence among women who completed all ten rites of initiation, a  
52 sensitivity analysis dropped each initiation rite in turn to test relevance of each in initiation.  
53  
54  
55  
56  
57  
58  
59  
60

1  
2  
3 **Control of biases:** Involvement of healers and elders in the design guaranteed cultural fit.  
4 The questionnaire documented type of family planning (none, plants, pill, injection, condom,  
5 pessary, surgery, partner-managed contraception), and duration of use of each method, as  
6 this could affect dysmenorrhoea; hormonal pills can diminish pain and IUDs can increase  
7 pain. Use of Western contraceptive methods also coincides with Western acculturation. We  
8 stratified by contraceptive use to separate between the effect of the contraceptive and the  
9 initiation rites. To avoid an acculturation bias from interviewing only women who did not go to  
10 nearby towns for work, we conducted the study in December when most return to their  
11 homes. We took age, menopause and education into account by stratification to limit the  
12 differential influence of these on responses.  
13  
14  
15  
16  
17

18 **Ethical aspects:** The CIET ethical review committee at the Universidad Autónoma de  
19 Guerrero and Research Fund at the Universidad del Rosario in Colombia both approved the  
20 proposal. The leadership of each community signed formal agreements for data  
21 management and sharing with all participants present, after the researchers had explained to  
22 all the nature of the study, how data would be used, confidentiality, and rights to decline  
23 participation.[27]  
24  
25  
26  
27  
28  
29

## 30 RESULTS

31  
32 A total of 185 women participated, representing 70.6% of the 262 women over the age of 12  
33 years identified in the 2006 census. The 77 women excluded had either migrated from the  
34 area or they had not completed two menstruations. Of 158 women who knew their age in  
35 years, the average was 32.5 years (mode 19 years, sd 15.6). Respondents reported low  
36 levels of education, 28.3% (52/184) with no schooling and only 17.3% (32/185) with  
37 secondary education. Few used family planning (11.1% based on 15/135) with an average of  
38 4.9 children each (sd 2.7).  
39  
40  
41  
42

43 The average age of menarche was 13.8 years (sd 1.16). Some 52% (97/185) reported  
44 dysmenorrhoea and 88.6% (164/185) reported undergoing at least some rite of initiation  
45 during menarche. Table 1 shows the proportion involved in each of ten activities identified by  
46 traditional healers as the initiation rites. Considering each rite separately, only emesis  
47 retained a significant association on its own with dysmenorrhea, after taking into account age  
48 of the woman, community of origin (some had more access to Western ways), parity, family  
49 planning by sequential stratification and adjusting for menopause and education. The Forest  
50 plot (Figure 2) shows dysmenorrhoea associated with each component rite compared with  
51 women who did no rites. The average effect size was OR 1.66 (95%CI 1.35-2.04).  
52  
53  
54  
55  
56  
57  
58  
59  
60

Table 1: Exposure to different aspects of initiation rite

| Initiation rite                | % of all women receiving this rite | Risk of dysmenorrhoea in each subgroup |        |       |        |      |
|--------------------------------|------------------------------------|----------------------------------------|--------|-------|--------|------|
|                                |                                    | Si                                     | No     | ORa   | 95% CI |      |
| Emesis                         | 38.4%                              | 27/71                                  | 70/114 | 2.59* | 1.42   | 4.75 |
| Cared for during the ceremony  | 76.8%                              | 69/142                                 | 28/43  | 1.97  | 0.98   | 3.99 |
| Applied <i>carayurú</i> powder | 84.3%                              | 78/156                                 | 19/29  | 1.9   | 0.84   | 4.32 |
| Spent time in isolation        | 71.9%                              | 64/133                                 | 33/52  | 1.87  | 0.97   | 3.61 |
| Followed prescribed diet       | 71.9%                              | 64/133                                 | 33/52  | 1.87  | 0.97   | 3.61 |
| Body painted with <i>we</i>    | 50.8%                              | 44/94                                  | 53/91  | 1.58  | 0.89   | 2.83 |
| Had a godmother                | 50.8%                              | 45/94                                  | 50/88  | 1.43  | 0.8    | 2.57 |
| Cut hair                       | 68.6%                              | 64/127                                 | 33/58  | 1.3   | 0.69   | 2.43 |
| Inhaled <i>ají</i>             | 49.2%                              | 45/91                                  | 52/94  | 1.27  | 0.71   | 2.26 |
| Blessed by traditional healer  | 88.6%                              | 85/164                                 | 12/21  | 1.24  | 0.49   | 3.1  |

\* Adjusted for age and level of education.

To understand the role of each rite in relation to dysmenorrhoea, a sensitivity analysis compared dysmenorrhoea rates among women who did all ten rites (n=32) with women who participated in less than the ten, dropping each rite in turn. Figure 3 shows the unadjusted odds of dysmenorrhoea for all rites compared with failing to do specific rites, and those who did no rites.

The contrast was more stark between those who did no rituals at all (10/14), and those who completed the ten activities (8/32) (Fisher p 0.01). Those who did some but not all rites were somewhere in-between (89/153) (p-Fisher 0.001).

Most respondents with dysmenorrhoea (92/97) reported severity using the Wong-Baker Faces Pain Rating Scale. Table 2 shows a statistically significant increase across five levels of severity for those who completed all rites compared with those who did any or no rites (p=0.0014), and compared with those who did no rites (p= 0.0039).

Table 2 Completion of initiation rites and reported intensity of dysmenorrhoea

|                               | No dysmenorrhoea | Intensity of dysmenorrhoea |             |              |              |
|-------------------------------|------------------|----------------------------|-------------|--------------|--------------|
|                               |                  | 0                          | 1           | 2            | 3            |
| <b>Incomplete or no rites</b> | 64               | 18                         | 20          | 19           | 27           |
| <b>All rites completed</b>    | 24               | 2                          | 4           | 1            | 1            |
| <b>Total</b>                  | 88               | 20                         | 24          | 20           | 28           |
| <b>OR</b>                     |                  | 3.94                       | 3.49        | 6.76         | 6.92         |
| <b>95%CI</b>                  |                  | 1.72 - 9.00                | 1.41 - 8.64 | 1.84 - 24.93 | 1.17 - 40.88 |

Extended Mantel-Haenszel chi square for linear trend = 10.16



p-value(1 degree of freedom) = 0.0014

|                            | No<br>dysmenorrhoea | Intensity of dysmenorrhoea |              |              |              |
|----------------------------|---------------------|----------------------------|--------------|--------------|--------------|
|                            |                     | 0                          | 1            | 2            | 3            |
| <b>No rites at all</b>     | 4                   | 1                          | 3            | 3            | 2            |
| <b>All rites completed</b> | 24                  | 2                          | 4            | 1            | 1            |
| <b>Total</b>               | 28                  | 3                          | 7            | 4            | 3            |
| <b>OR</b>                  |                     | 6.75                       | 6.93         | 9.38         | 5.64         |
| <b>IC 95%</b>              |                     | 1.72 - 26.42               | 1.77 - 27.17 | 1.82 - 48.41 | 0.57 - 55.87 |
| <b>P-Fisher</b>            |                     | 0.01                       | 0.01         | 0.02         | 0.2          |

Extended Mantel-Haenszel chi square for linear trend = 8.33

p-value(1 degree of freedom) = 0.0039

## DISCUSSION

Our results support the idea that abandoning traditional initiation rites, or adopting practices that go along with abandoning these rites, is a risk factor for dysmenorrhoea. Emesis was the single strongest protective rite on its own, but sensitivity analysis showed a consistent effect of the other rites for those who did not abandon the initiation practices. The apparent lack of specific effects of each component rite supports the idea that synergy between all components completes the protective effect.

This study faced several common challenges in inter-cultural epidemiology. Even with all eligible women participating, the small numbers problem is well recognised[28-31] and has no easy solution. As anticipated, we found it difficult to untangle issues like use of contraceptives and reporting of age, given the effect of acculturation on these. Despite this interdependence of exposures, we believe we were able to show an independent effect of initiation rites.

Inter-cultural approaches have received little attention in the epidemiological literature, and these need further investment. In this study, the indigenous leaders of the seven communities requested the study and set the research question; they specified the cultural exposures of interest; they participated in the design and testing of instruments; they led the interpretation of results; and they are the primary research users, sharing the results with their communities in support of traditional health practices.

In these important dynamics, the research was culturally safe. Even so, cultural issues probably reduced the effectiveness of the study and reduced the numbers further. The 14.6% (27/185) of women who could not give their age in calendar years is testimony to their

1  
2  
3 distance from Western culture. Analysing only those who mention an age included a cultural  
4 filter, limiting our conclusions to those with some measure of Western acculturation.  
5

6 The average age of menarche of our sample was higher than typically reported in the  
7 literature,[32-37] possibly indicating a relatively low level of secular change.[38, 39] That one  
8 half of the women reported dysmenorrhoea (97/185) is lower than reported in international  
9 studies.[40-44] Although the local definition (facial expressions) was useful for internal  
10 comparisons, it is of limited value in international comparisons.  
11  
12

13  
14 We tried to take account of other acculturation issues, beyond initiation rites, by stratifying for  
15 education, age, parity, community of residence (some had greater access to modern towns)  
16 and use of family planning. The lower risk associated with initiation rites might still be due to  
17 unmeasured lifestyle issues associated with maintaining initiation rites. Resolving this  
18 requires a randomised controlled trial that supports initiation rites in some communities and  
19 not in others, measuring decrease in dysmenorrhoea as the outcome.  
20  
21  
22  
23

24 Since the 1950s, public health programmes have contemplated primary, secondary and  
25 tertiary prevention.[45] More recently, *primordial prevention* identified social, economic and  
26 cultural patterns that affect risks.[46] Albeit with limitations, our study suggests that primary  
27 or primordial prevention of dysmenorrhoea might be possible for indigenous women who are  
28 increasingly in contact with Western ways.  
29  
30  
31  
32  
33

## 34 CONCLUSIONS

35  
36 Without adding insight into exact mechanisms, this cross-sectional study shows an  
37 association between abandoning initiation rites and dysmenorrhoea. No one of the rites on  
38 its own explains this association. The study suggests feasibility and usefulness of inter-  
39 cultural epidemiology: a longer term dialogue led to the research question and design; the  
40 indigenous leaders defined the exposure of interest; the ethical review process fitted with  
41 indigenous ethical concepts; it generated evidence suggesting an effective traditional  
42 practice, without understanding how this works.  
43  
44  
45  
46  
47  
48  
49  
50  
51  
52  
53  
54  
55  
56  
57  
58  
59  
60

## ACKNOWLEDGMENTS

Field work was financed by The Research Fund of Universidad del Rosario. Benedicto Mejía and Efraín Mejía, along with other *payés* (wise men) from the seven communities participated in formulation of research questions, design, application of the instrument and interpretation of results. Alicia Jaramillo and Guillermina Ferrer translated the questions during the application of the instrument. Carolina Amaya and Natalia Reinoso carried out the pilot study and the research instrument application in the seven communities. Iván Sarmiento helped with data analysis, tables and figures elaboration and revision of citations and bibliographic references. Andrés Cañón and Sebastián Luna collaborated with the systematic review of cultural risk factors for dysmenorrhea.

## COMPETING INTERESTS

We, the authors, declare that there are no conflicts of interest in this study regarding the Indigenous communities that took part, the recognised rights of the Indigenous Peoples, or the financing institutions.

## FUNDING

Fieldwork was financed by The Research Fund of Universidad del Rosario. Germán Zuluaga, MD, MSc carried out the research project as part fulfilment of the requirements of MSc (Epidemiology) at the Universidad Autónoma de Guerrero.

## DATA SHARING

Asatrízy, Gestis and Cemi signed a data sharing agreement in May 18th 2008. All the information is available in the Cemi's document bank.

## FIGURE LEGENDS

Figure 1: Wong-Baker Faces Pain Rating Scale

Figure 2: Forest plot of individual initiation rites and risk of dysmenorrhoea

Figure 3: Sensitivity analysis compared dysmenorrhoea risk among women who did all ten rites (n=32) compared with women who did not do at least one rite, and those who did no rite (listing shows excluded rites)

1  
2  
3  
4  
5  
6  
7  
8  
9  
10  
11  
12  
13  
14  
15  
16  
17  
18  
19  
20  
21  
22  
23  
24  
25  
26  
27  
28  
29  
30  
31  
32  
33  
34  
35  
36  
37  
38  
39  
40  
41  
42  
43  
44  
45  
46  
47  
48  
49  
50  
51  
52  
53  
54  
55  
56  
57  
58  
59  
60

For peer review only

## REFERENCE LIST

---

1. Cameron M, Andersson N, and Ledogar RJ. Culturally safe epidemiology: oxymoron or scientific imperative. *Pimatisiwin: Journal of Aboriginal and Indigenous Community Health* 2010;**8**(2):89-116.
2. Piñeros-Petersen M, Ruiz-Salguero M. Aspectos demográficos en comunidades indígenas de tres regiones de Colombia. *Salud Pública Mex* 1998;**40**:324-329.
3. Dirección de Etnias del Ministerio del Interior y de Justicia. *Resolución no. 0006 de 26 de enero de 2005, por medio de la cual se inscribe en el registro de asociaciones de autoridades tradicionales y/o cabildos la constitución de la asociación de autoridades tradicionales indígenas de la zona de Yapú - ASATRIZY*. Bogotá (CO): Min. Int. Just, 2005.
4. Asociación de Autoridades Tradicionales Indígenas de la Zona de Yapú. *Plan de vida: unidos con un Solo pensamiento para vivir bien*. Sarmiento I, Amaya C, eds. Bogotá (CO): Asoc. de Aut. Trad. Indíg. de la Zona de Yapú, 2008.
5. Asociación de Autoridades Tradicionales Indígenas de la Zona de Yapú. *Historia y origen del proceso de un Nuevo despertar*. Sarmiento I, Amaya C, eds. Bogotá (CO): Asoc. de Aut. Trad. Indíg. de la Zona de Yapú, 2008.
6. World Health Organization. *Engaging for Health. 11th General Program of Work 2006-2015, a Global Health Agenda*. Geneva (CH): WHO, 2006. (Working paper GPW/2006-2015). Available at: [http://whqlibdoc.who.int/publications/2006/GPW\\_eng.pdf](http://whqlibdoc.who.int/publications/2006/GPW_eng.pdf). Accessed October 15, 2008.
7. Rodríguez J. *Descripción de la mortalidad por departamentos: Colombia año 2000*. Bogotá (CO): Pontificia Universidad Javeriana, Cendex. (Working Paper ASS /DT 016-05). Available at: <http://www.cendex.org.co/pdf/DT016-05.pdf>. Accessed January 15, 2008.
8. Cuevas E. *Mortalidad materna, Colombia 2005: análisis de la información de la vigilancia rutinaria*. In: Inf. quincenal Epidemiológico Nac. Bogotá (CO): Ministerio de Protección Social, Dir. General de Salud Pública; 2007 Mar 15. 12(5):65-80. (Inf. quincenal Epidemiol Nal.).
9. World Health Organization. *Traditional Medicine and Health Coverage*. Geneva (CH): WHO, 1983.
10. World Health Organization. *WHO Traditional Medicine Strategy: 2002-2005*. Geneva, (CH): WHO, 2002.

- 1  
2  
3 11. Organización Panamericana de la Salud, División de Desarrollos de Sistemas y  
4 Servicios de Salud. *Fortalecimiento y desarrollo de los sistemas de salud tradicionales: plan*  
5 *de acción 1995-1998*. Washington: OPS, 1995.
- 6  
7  
8 12. Garg S, Sharma N, Sahay R. Socio-cultural aspects of menstruation in an urban slum  
9 in Delhi, India. *Reprod Health Matters* 2001;**9**:16-25.
- 10  
11 13. Avasarala AK, Panchangam S. Dysmenorrhoea in different settings: are the rural and  
12 urban adolescent girls perceiving and managing the dysmenorrhoea problem differently?  
13 *Indian J Community Med* 2008;**33**:246-249.
- 14  
15 14. Goldstein-Ferber S, Granot M. The association between somatization and perceived  
16 ability: roles in dysmenorrhea among israeli arab adolescents. *Psychosom Med*  
17 2006;**68**:136-142.
- 18  
19 15. Marván ML, Vacio A, García-Yañez G, *et al*. Attitudes toward menarche among  
20 mexican preadolescents. *Women Health* 2007;**46**:7-23.
- 21  
22 16. Latthe P, Mignini L, Gray R, *et al*. Factors predisposing women to chronic pelvic pain:  
23 systematic review. *BMJ* 2006;**332**:749-755.
- 24  
25 17. Patel A, Tanksale V, Sahasrabhojane M, *et al*. The burden and determinants of  
26 dysmenorrhoea: a population-based survey of 2262 women in Goa, India. *BJOG*  
27 2006;**113**:453-463.
- 28  
29 18. Balbi C, Musone R, Menditto A, *et al*. Influence of menstrual factors and dietary habits  
30 on menstrual pain in adolescence age. *Eur J Obstet Gynecol Reprod Biol* 2000;**91**:143-148.
- 31  
32 19. Proctor ML, Murphy PA. Herbal and dietary therapies for primary and secondary  
33 dysmenorrhoea. *Cochrane Database Syst Rev* 2001;**(3)**:CD002124.
- 34  
35 20. Parazzini F, Tozzi L, Mezzopane R, *et al*. Cigarette smoking, alcohol consumption,  
36 and risk of primary dysmenorrhea. *Epidemiology* 1994;**5**:469-472.
- 37  
38 21. Mazza D. Women's Health in General Practice. Oxford: Butterworth Heinemann,  
39 2004.
- 40  
41 22. Deb Sh, Raine-Fenning N. Dysmenorrhoea. *Obstetrics, Gynaecology and*  
42 *Reproductive Medicine* 2008;**18**:294-299.
- 43  
44 23. Dawood MY. Primary dysmenorrhoea: advances in pathogenesis and management.  
45 *Obstet Gynecol* 2006;**108**:428-441.
- 46  
47 24. Wong D, Whaley L. *Clinical handbook of pediatric nursing*. 2nd ed. Saint Louis (MO):  
48 Mosby Company, 1986. Quoted by: National Institutes of Health, NIH Pain Consortium. Pain  
49  
50  
51  
52  
53  
54  
55  
56  
57  
58  
59  
60

1  
2  
3 intensity scales – Wong-Baker faces pain rating scale [NIH Pain Consortium Web site]. July  
4 17, 2007.

5  
6 [http://painconsortium.nih.gov/pain\\_scales/Wong-Baker\\_Faces.pdf](http://painconsortium.nih.gov/pain_scales/Wong-Baker_Faces.pdf) (accessed 24 April 2012).

7  
8 25. World Health Organization. *General Guidelines for Methodologies on Research and*  
9 *Evaluation of Traditional Medicine*. Geneva (CH): WHO, 2000. (Working paper  
10 WHO/EDM/TRM/2000.1)

11  
12 26. Dean AG, Sullivan KM, Soe MM. OpenEpi: Open Source Epidemiologic Statistics for  
13 Public Health, Version 2.3.1.

14  
15 [www.OpenEpi.com](http://www.OpenEpi.com) (accessed 23 August 2012).

16  
17 27. Grupo de Estudios en Sistemas Tradicionales de Salud. Principios éticos para  
18 estudios médicos aplicados a los sistemas tradicionales de salud [CEMI Web site], 2008.

19  
20 [http://www.cemi.org.co/images/PRINCIPIOS\\_ETICOS\\_GESTS\\_CEMI.pdf](http://www.cemi.org.co/images/PRINCIPIOS_ETICOS_GESTS_CEMI.pdf) (accessed 14 Jun  
21 2010).

22  
23 28. Andresen EM, Diehr PH, Luke DA. Public health surveillance of low-frequency  
24 populations. *Annu Rev Public Health* 2004;**25**:25-52.

25  
26 29. Friedsam D. *Racial and Ethnic Data: are They Reliable for Program and Policy*  
27 *Development?*. Madison (Wis): Population Health Institute, University of Wisconsin, 2002.  
28 Wisconsin Public Health and Health Policy Institute Issue Brief Vol. 3 no. 5.

29  
30 30. Landau LB, Roever S. The Burden of Representation in Humanitarian Contexts:  
31 Survey Research on Mobile and Marginal Populations. Wits (ZA): Forced Migration Studies  
32 Programme, University of the Witwatersrand; 2004. (Working paper no. 10).

33  
34 [http://migration.org.za/research/downloads/papers/10\\_landauroever.pdf](http://migration.org.za/research/downloads/papers/10_landauroever.pdf) (accessed 21  
35 January 2008).

36  
37 31. Monasta L, Andersson N, Ledogar RJ, *et al*. Minority health and small numbers  
38 epidemiology: a case study of living conditions and health of children in five foreign Roma  
39 camps in Italy. *Am J Public Health* 2008;**98**:2035-2041.

40  
41 32. Vera Y, Hidalgo G, Gollo O, *et al*. Edad de la menarquia y su relación con el estrato  
42 social en cinco estados venezolanos. *Acta Cient Estud* 2009;**7**:130-135.

43  
44 33. Ulate G. Edad de la menarquia en el Valle Central de Costa Rica y factores  
45 asociados a su aparición. *Rev Costarric Cienc Med* 1995;**16**:37-41.

46  
47 34. Fonseca J, Aguilar O. Edad de la Menarquia en San Pedro Sula. *Rev Med Hondur*  
48 1991;**59**: 4-7.

- 1  
2  
3 35. Hernández I, Unanue N, Gaete X, *et al.* Edad de la menarquia y su relación con el  
4 nivel socioeconómico e índice de masa corporal. *Rev Med Chil* 2007;**135**:1429-1436.  
5  
6 36. Sharma N, Vaid S, Manhas A. Age at menarche in two caste groups (brahmins and  
7 rajputs) from rural areas of Jammu. *Anthropologist* 2006;**8**:55-7.  
8  
9 37. Romans SE, Martin JM, Gendall K, *et al.* Age of menarche: the role of some  
10 psychosocial factors. *Psychol Med* 2003;**33**:933–939.  
11  
12 38. Padez C. Social background and age at menarche in portuguese university students:  
13 a note on the secular changes in Portugal. *Am J Hum Biol* 2003;**15**:415-427.  
14  
15 39. Tanner JM. *Growth at Adolescence*. 2nd ed. Oxford: Blackwell, 1962. Quoted by:  
16 Korah L. Knowledge and perceptions regarding menstruation among adolescent girls: a  
17 research study. *Nurs J India* 1991;**82**:205-209.  
18  
19 40. Woods NF, Most A, Dery GK. Prevalence of perimenstrual symptoms. *Am J Public*  
20 *Health* 1982;**72**:1257-1264.  
21  
22 41. Klein JR, Litt IF. Epidemiology of adolescent dysmenorrhea. *Pediatrics* 1981;**68**:661-  
23 664.  
24  
25 42. Wilson CA, Keye WRJ. A survey of adolescent dysmenorrhea and premenstrual  
26 symptom frequency, a model program for prevention, detection, and treatment. *J Adolesc*  
27 *Health Care*. 1989;**10**:317-322.  
28  
29 43. Jamieson D, Steege J. Prevalence of dysmenorrhoea, dyspareunia, pelvic pain and  
30 irritable bowle syndrome in primary care practices. *Obstet Gynecol* 1996;**87**:55-58.  
31  
32 44. Latthe P, Latthe M, Say L, *et al.* WHO systematic review of prevalence of chronic  
33 pelvic pain: a neglected reproductive health morbidity. *BMC Public Health* 2006;**6**:177.  
34  
35 45. Blanco J, Maya J, eds. *Fundamentos de salud pública, Tomo 1, salud pública*.  
36 Medellín (CO): Corporación para Investigaciones Biológicas, 1997.  
37  
38 46. Beaglehole R, Bonita R, Kjellstrom T. *Epidemiología básica*. Washington: OPS, 2003.  
39  
40  
41  
42  
43  
44  
45  
46  
47  
48  
49  
50  
51  
52  
53  
54  
55  
56  
57  
58  
59  
60



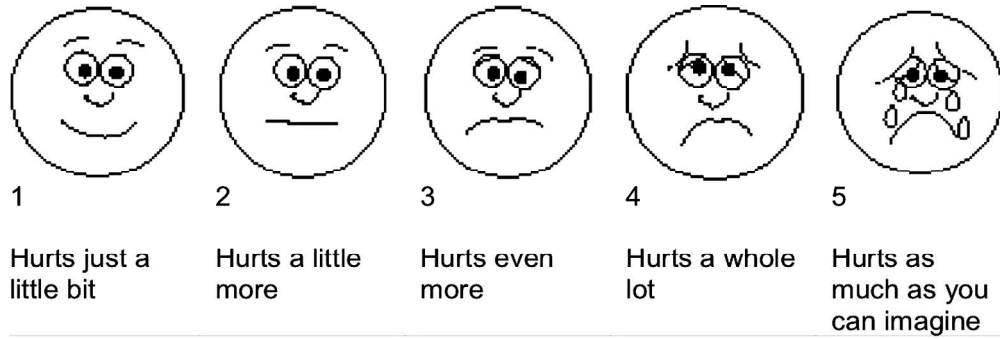

Wong-Baker Faces Pain Rating Scale  
180x59mm (300 x 300 DPI)

peer review only

1  
2  
3  
4  
5  
6  
7  
8  
9  
10  
11  
12  
13  
14  
15  
16  
17  
18  
19  
20  
21  
22  
23  
24  
25  
26  
27  
28  
29  
30  
31  
32  
33  
34  
35  
36  
37  
38  
39  
40  
41  
42  
43  
44  
45  
46  
47  
48  
49  
50  
51  
52  
53  
54  
55  
56  
57  
58  
59  
60

1  
2  
3  
4  
5  
6  
7  
8  
9  
10  
11  
12  
13  
14  
15  
16  
17  
18  
19  
20  
21  
22  
23  
24  
25  
26  
27  
28  
29  
30  
31  
32  
33  
34  
35  
36  
37  
38  
39  
40  
41  
42  
43  
44  
45  
46  
47  
48  
49  
50  
51  
52  
53  
54  
55  
56  
57  
58  
59  
60

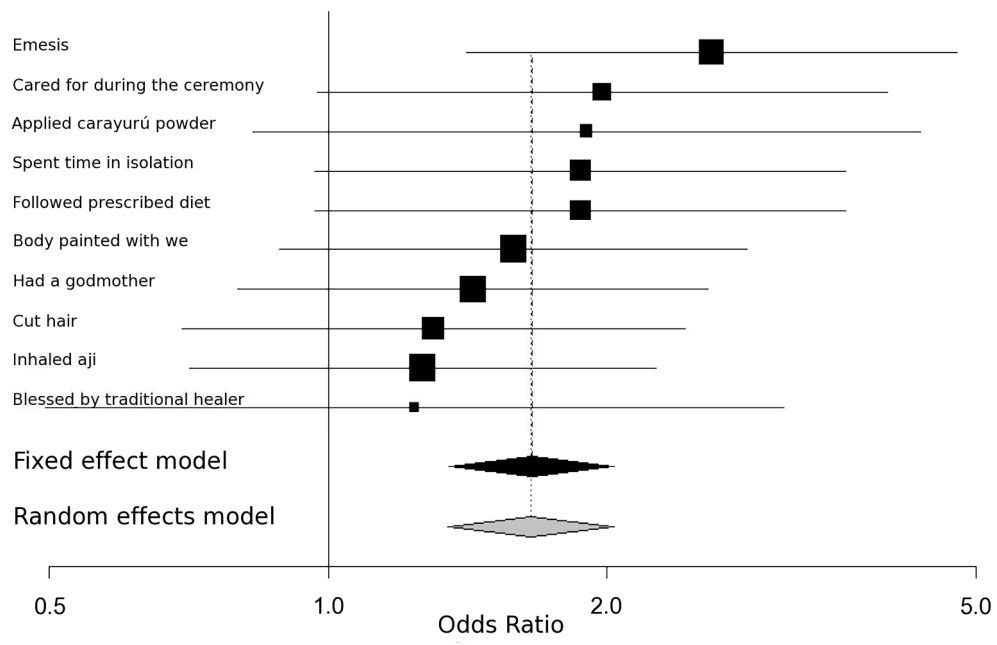

Forest plot of individual initiation rites and risk of dysmenorrhoea  
180x114mm (300 x 300 DPI)

Review only

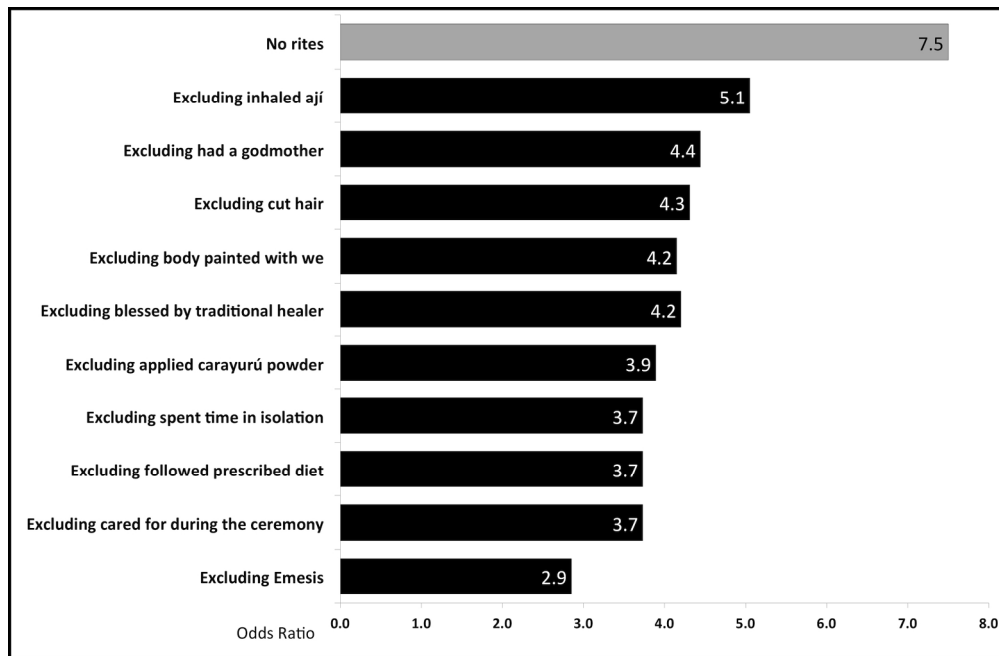

Sensitivity analysis compared dysmenorrhoea risk among women who did all ten rites (n=32) compared with women who did not do at least one rite, and those who did no rite (listing shows excluded rites)  
180x117mm (300 x 300 DPI)

STROBE 2007 (v4) Statement—Checklist of items that should be included in reports of *cross-sectional studies*

| Section/Topic             | Item # | Recommendation                                                                                                                                                                       | Reported on page #                                                      |
|---------------------------|--------|--------------------------------------------------------------------------------------------------------------------------------------------------------------------------------------|-------------------------------------------------------------------------|
| Title and abstract        | 1      | (a) Indicate the study’s design with a commonly used term in the title or the abstract                                                                                               | “Cross-sectional studies” appears in title                              |
|                           |        | (b) Provide in the abstract an informative and balanced summary of what was done and what was found                                                                                  | Structured abstract provided                                            |
| <b>Introduction</b>       |        |                                                                                                                                                                                      |                                                                         |
| Background/rationale      | 2      | Explain the scientific background and rationale for the investigation being reported                                                                                                 | Abstract and para 1 and 3 of introduction (p3)                          |
| Objectives                | 3      | State specific objectives, including any prespecified hypotheses                                                                                                                     | Abstract and para 2 Introduction (p3)                                   |
| <b>Methods</b>            |        |                                                                                                                                                                                      |                                                                         |
| Study design              | 4      | Present key elements of study design early in the paper                                                                                                                              | Abstract, paras 1 and 3 of Introduction (p1), para 1 of Discussion (p7) |
| Setting                   | 5      | Describe the setting, locations, and relevant dates, including periods of recruitment, exposure, follow-up, and data collection                                                      | Methods (p3 and p4)                                                     |
| Participants              | 6      | (a) Give the eligibility criteria, and the sources and methods of selection of participants                                                                                          | First para of Methods, p3                                               |
| Variables                 | 7      | Clearly define all outcomes, exposures, predictors, potential confounders, and effect modifiers. Give diagnostic criteria, if applicable                                             | Paras 2-3 of Methods (p3 and p4), and para 2 of Discussion (p8)         |
| Data sources/ measurement | 8*     | For each variable of interest, give sources of data and details of methods of assessment (measurement). Describe comparability of assessment methods if there is more than one group | Paras 2-3 of Methods (p3 and p4)                                        |
| Bias                      | 9      | Describe any efforts to address potential sources of bias                                                                                                                            | Para 7 of Methods (p5)                                                  |
| Study size                | 10     | Explain how the study size was arrived at                                                                                                                                            | Para 2 of Discussion (p7), all available women were included.           |

|                        |     |                                                                                                                                                                                                              |                                                                             |
|------------------------|-----|--------------------------------------------------------------------------------------------------------------------------------------------------------------------------------------------------------------|-----------------------------------------------------------------------------|
| Quantitative variables | 11  | Explain how quantitative variables were handled in the analyses. If applicable, describe which groupings were chosen and why                                                                                 | Abstract, paras 2, 3, 5, 6 of Methods (p3 and p4), para 5 Discussion (p8)   |
| Statistical methods    | 12  | (a) Describe all statistical methods, including those used to control for confounding                                                                                                                        | Paras 5-6 of Methods (p4)                                                   |
|                        |     | (b) Describe any methods used to examine subgroups and interactions                                                                                                                                          | Para 6 of Discussion (p8)                                                   |
|                        |     | (c) Explain how missing data were addressed                                                                                                                                                                  | Para 1 of Results (p5)                                                      |
|                        |     | (d) If applicable, describe analytical methods taking account of sampling strategy                                                                                                                           | Paras 5-6 of Methods (p4)                                                   |
|                        |     | (e) Describe any sensitivity analyses                                                                                                                                                                        | Para 3 of Results (Figure 3) (p6)                                           |
| <b>Results</b>         |     |                                                                                                                                                                                                              |                                                                             |
| Participants           | 13* | (a) Report numbers of individuals at each stage of study—eg numbers potentially eligible, examined for eligibility, confirmed eligible, included in the study, completing follow-up, and analysed            | Para 1 of Results (p5), para 1 of methods (p3)                              |
|                        |     | (b) Give reasons for non-participation at each stage                                                                                                                                                         | Para 1 of Results (p5)                                                      |
|                        |     | (c) Consider use of a flow diagram                                                                                                                                                                           | Not applicable                                                              |
| Descriptive data       | 14* | (a) Give characteristics of study participants (eg demographic, clinical, social) and information on exposures and potential confounders                                                                     | Para 2 of Introduction (p3), para 1 of Methods (p3), para 1 of Results (p5) |
|                        |     | (b) Indicate number of participants with missing data for each variable of interest                                                                                                                          | Para 1 of Results (p5)                                                      |
| Outcome data           | 15* | Report numbers of outcome events or summary measures                                                                                                                                                         | Para 2-5 of Results (p5 and p6)                                             |
| Main results           | 16  | (a) Give unadjusted estimates and, if applicable, confounder-adjusted estimates and their precision (eg, 95% confidence interval). Make clear which confounders were adjusted for and why they were included | Tables 1 and 2                                                              |
|                        |     | (b) Report category boundaries when continuous variables were categorized                                                                                                                                    | Tables 1 and 2                                                              |
|                        |     | (c) If relevant, consider translating estimates of relative risk into absolute risk for a meaningful time period                                                                                             | Not Applicable                                                              |
| Other analyses         | 17  | Report other analyses done—eg analyses of subgroups and interactions, and sensitivity analyses                                                                                                               | Table 2 and Figure 2                                                        |
| <b>Discussion</b>      |     |                                                                                                                                                                                                              |                                                                             |
| Key results            | 18  | Summarise key results with reference to study objectives                                                                                                                                                     | Paras 2, 4, 5 of Results (p5 and p6), para 5 of Discussion (p8)             |

1  
2  
3  
4  
5  
6  
7  
8  
9  
10  
11  
12  
13  
14  
15  
16  
17  
18  
19  
20  
21  
22  
23  
24  
25  
26  
27  
28  
29  
30  
31  
32  
33  
34  
35  
36  
37  
38  
39  
40  
41  
42  
43  
44  
45  
46  
47  
48  
49

|                          |    |                                                                                                                                                                            |                                                                                                        |
|--------------------------|----|----------------------------------------------------------------------------------------------------------------------------------------------------------------------------|--------------------------------------------------------------------------------------------------------|
| Limitations              | 19 | Discuss limitations of the study, taking into account sources of potential bias or imprecision. Discuss both direction and magnitude of any potential bias                 | Abstract, para 1 of Introduction (p3), para 7 of Methods (p5), paras 2 and 5 of Discussion (p7 and p8) |
| Interpretation           | 20 | Give a cautious overall interpretation of results considering objectives, limitations, multiplicity of analyses, results from similar studies, and other relevant evidence | Abstract and Discussion                                                                                |
| Generalisability         | 21 | Discuss the generalisability (external validity) of the study results                                                                                                      | Paras 2, 3, 5 and 7 of Discussion (p7 and p8)                                                          |
| <b>Other information</b> |    |                                                                                                                                                                            |                                                                                                        |
| Funding                  | 22 | Give the source of funding and the role of the funders for the present study and, if applicable, for the original study on which the present article is based              | P9                                                                                                     |

\*Give information separately for cases and controls in case-control studies and, if applicable, for exposed and unexposed groups in cohort and cross-sectional studies.

**Note:** An Explanation and Elaboration article discusses each checklist item and gives methodological background and published examples of transparent reporting. The STROBE checklist is best used in conjunction with this article (freely available on the Web sites of PLoS Medicine at <http://www.plosmedicine.org/>, Annals of Internal Medicine at <http://www.annals.org/>, and Epidemiology at <http://www.epidem.com/>). Information on the STROBE Initiative is available at [www.strobe-statement.org](http://www.strobe-statement.org).

## CONVENIO PARA COMPARTIR INFORMACIÓN

**ENTRE:** La Asociación de Autoridades Tradicionales Indígenas de la Zona de Yapú, ASATRIZY, representada por su Junta Directiva.

**Y:** El Grupo de Estudios en Sistemas Tradicionales de Salud de la Facultad de Medicina de la Universidad del Rosario (GESTS) y el Centro de Estudios Médicos Interculturales (CEMI), representados por su director.

### 1. Preámbulo

El presente convenio reconoce y respeta el derecho a la autodeterminación de los pueblos indígenas de la zona de Yapú, en el marco de los cinco derechos fundamentales de los pueblos indígenas reconocidos por la Constitución Política de 1991, la Ley 21 de 1991 de la República de Colombia, aprobatoria del Convenio # 169 de la Organización Internacional del Trabajo, y su naturaleza jurídica de entidad de derecho público de carácter especial, que incluye la potestad para tomar decisiones sobre investigación en sus comunidades. Se considera que los beneficios a las comunidades, a cada región y al esfuerzo nacional se deben fortalecer por medio de la investigación, culturalmente sensible. La investigación tiene que facilitar la propiedad y el manejo por parte de las comunidades de la información sobre su salud y contribuir con la promoción de estilos de vida saludables, prácticas y planeación efectiva de programas, en el marco de sus Planes de Vida.

### 2. Propósito

El presente convenio define los términos para compartir información entre Asatriza y el GESTS, en relación con los datos recogidos en el *Estudio epidemiológico para un programa de intervención en atención primaria de salud para la promoción y prevención de las enfermedades relacionadas con el ciclo reproductivo de las mujeres indígenas en comunidades del Vaupés*, (en adelante el Proyecto). El propósito del presente convenio es formalizar un acuerdo entre ASATRIZY y el GESTS, respecto de la ejecución del proyecto de investigación, incluyendo la propiedad y el manejo de todos los datos recogidos como parte del proyecto.

### 3. Antecedentes

La Asociación de Autoridades Tradicionales Indígenas de la Zona de Yapú está conformada por siete capitanías vecinas a los ríos Papurí, Yapú y Caño Colorado, en el departamento del Vaupés y tiene como propósito impulsar y liderar la ejecución del Plan de Vida promoviendo la cultura, los valores y las normas tradicionales de manera que permita el desarrollo integral y la conservación física y cultural de la comunidad.

El Grupo de Estudios en Sistemas Tradicionales de Salud de la facultad de medicina de la Universidad del Rosario, reconocido formalmente por COLCIENCIAS desde el año 2002, tiene como objetivo aportar al estudio, conservación, recuperación y promoción de los sistemas médicos tradicionales para contribuir al mejoramiento de la salud humana.

El Centro de Estudios Médicos Interculturales, CEMI, es una organización no gubernamental colombiana, sin ánimo de lucro, cuyo objetivo es contribuir al desarrollo de una política intercultural de salud, mediante el estudio, la evaluación, el diseño y la aplicación de estrategias de atención en las que se amplía la noción del concepto salud-enfermedad, considerando los aspectos culturales y ambientales.

1  
2  
3  
4 Integrantes del GESTS y del CEMI vienen acompañando a las comunidades indígenas de Yapú  
5 en su proceso de organización, diseño y ejecución del Plan de Vida, siempre procurando la  
6 protección de la diversidad biológica y la defensa de la cultura y los conocimientos  
7 tradicionales. En noviembre de 2007 Asatrizy y el CEMI firmaron un convenio de  
8 acompañamiento que tiene vigencia hasta junio de 2009, el cual incluye reglas claras sobre el  
9 manejo compartido de la información resultante del trabajo conjunto y que tienen vigencia para  
10 el presente convenio.  
11

12  
13 Asatrizy, después de tres años de trabajo comunitario, en mayo de 2007 estableció el Plan de  
14 Vida, uno de cuyos capítulos promueve la construcción de un modelo propio de atención de  
15 salud, basado en la defensa y promoción de la cultura y los conocimientos tradicionales, pero  
16 procurando una prudente y respetuosa articulación con el sistema occidental de salud.  
17

18  
19 Para esto Asatrizy ha pedido al Dr. Zuluaga su acompañamiento, de manera que se pueda  
20 trabajar conjuntamente, conscientes de que las comunidades están siendo afectadas por  
21 muchos problemas de salud que no siempre tienen solución con la medicina occidental y que  
22 se han perdido muchas tradiciones y prácticas culturales que antes mantenían la salud. Esto  
23 incluye el desarrollo de un programa de recuperación y promoción de conocimientos  
24 tradicionales y prácticas de autocuidado.  
25

26 En la reunión de Junta Directiva de enero 11 de 2008 recibimos información sobre la propuesta  
27 de investigación que el CEMI propone realizar en nuestras comunidades, en el marco de los  
28 estudios de Maestría en Ciencias Médicas, Vertiente Epidemiología Aplicada, que el Dr.  
29 Zuluaga adelanta con la Universidad Autónoma de Guerrero (México) y el CIET, siendo  
30 aceptada de manera preliminar, por lo que se envió carta al Dr. Neil Andersson manifestando  
31 nuestro acuerdo.  
32

#### 33 34 **4. Meta**

35  
36 Realizar un estudio epidemiológico para un programa de intervención en atención primaria de  
37 salud para la promoción y prevención de las enfermedades relacionadas con el ciclo  
38 reproductivo de las mujeres indígenas en comunidades de Asatrizy, Vaupés.  
39

#### 40 41 **5. Objetivos**

- 42 a. Fortalecer, recuperar y promover los conocimientos tradicionales y la cultura de las  
43 comunidades de Asatrizy.
- 44 b. Adelantar un estudio transversal con la participación de las mujeres pertenecientes a las  
45 siete comunidades de Asatrizy.
- 46 c. Estudiar la prevalencia de problemas de salud relacionados con el ciclo vital de la mujer.
- 47 d. Estudiar la frecuencia de prácticas tradicionales relacionadas con el cuidado de los  
48 ciclos vitales de la mujer.
- 49 e. Determinar las posibles asociaciones entre enfermedades propias de la mujer y la  
50 pérdida de las prácticas tradicionales y culturales de salud.
- 51 f. Divulgar los resultados del estudio a las mujeres participantes, miembros de las  
52 comunidades, líderes, agentes sanitarios y educativos y la Junta Directiva de Asatrizy.
- 53 g. A partir de los resultados, realizar un programa de intervención en autocuidado y  
54 atención primaria en salud para la promoción y prevención de enfermedades  
55 relacionadas con el ciclo vital de la mujer.  
56  
57  
58  
59  
60



- 1  
2  
3  
4  
5  
6  
7  
8  
9
- h. A partir de los resultados, incluir un proceso de formación específica en salud tradicional en el proceso de educación propia que adelanta Asatrizy.
  - i. Compartir los resultados del estudio con las entidades de carácter municipal, departamental y nacional que tienen responsabilidad en los programas de salud, educación y desarrollo adelantados en las comunidades de Asatrizy, de manera que los programas tengan mayor sensibilidad cultural.

## 10 11 **6. Principios**

- 12  
13  
14  
15  
16  
17  
18  
19  
20  
21  
22  
23  
24  
25  
26
- a. El proyecto mejorará la capacidad y habilidades de miembros de la comunidad en investigación basada en la comunidad.
  - b. Las comunidades se involucrarán como socios en todos los aspectos de la investigación, desde el diseño hasta la implementación.
  - c. Se guardará el anonimato de los encuestados en todas las etapas y su identidad será protegida cuando los datos sean recogidos y los resultados presentados.
  - d. Asatrizy retiene la propiedad de los datos y será la primera en recibir los resultados.
  - e. Para proteger la identidad de los encuestados, el Gests guardará los datos en nombre de Asatrizy en un lugar seguro.
  - f. Todos los datos serán recogidos y guardados según lo establecido en este convenio.
  - g. Los datos de este proyecto sólo serán utilizados para alcanzar los objetivos y la meta establecida.

## 27 28 **7. Responsabilidades**

29  
30 Las partes se comprometen a que el proyecto se desarrolle como sigue:

- 31  
32  
33  
34  
35  
36  
37  
38  
39  
40  
41  
42  
43  
44  
45  
46  
47  
48  
49  
50  
51  
52
- a. Asatrizy supervisará el proyecto a través de la Junta Directiva y la Coordinadora de Mujeres.
  - b. El Gests trabajará con un individuo identificado por Asatrizy para coordinar la comunicación entre las comunidades participantes.
  - c. El Gests vinculará a investigadores de la comunidad seleccionados por Asatrizy para acompañar la investigación, recoger los datos e interpretar los resultados que han de compartir con sus comunidades.
  - d. El Gests validará el instrumento de recolección con los investigadores seleccionados por Asatrizy, considerando los aspectos culturales, de traducción de lengua y de sensibilidad de género.
  - e. El Gests financiará según necesidad la reunión de mujeres de las siete comunidades para la realización y retroalimentación del proyecto.
  - f. Asatrizy acompañará, con por lo menos un representante, la gira para la realización de las encuestas y la recolección de todos los datos.
  - g. El Gests presentará los resultados a Asatrizy de manera apropiada y útil, y responderá ante solicitudes adicionales de análisis.
  - h. Los hallazgos serán presentados a los participantes de la comunidad y serán invitados a ofrecer retroalimentación/interpretación de los resultados. El Gests también asistirá en la presentación de los hallazgos a nivel comunitario, según solicitud.

## 53 54 **8. Confidencialidad**

55  
56  
57  
58  
59  
60

Asatrizy y Gests se comprometen a salvaguardar la privacidad y seguridad de toda la información que contenga identificaciones personales y/o comunitarios. Se obtendrá consentimiento informado, culturalmente adecuado, según los requerimientos de la Junta

Directiva de Asatrizy, de la Unión de Mayores Kumuá Yoamará, de las mujeres encuestadas, previo a la recolección de la información personal.

## 9. Posterior divulgación

Asatrizy y Gests no divulgarán la información recolectada para ningún otro propósito a menos que acuerden lo contrario las dos partes y lo autoricen por escrito.

## 10. Modificaciones de éste convenio

Las modificaciones a este convenio se harán por escrito y firmadas por las partes.

En constancia las partes suscriben el presente convenio, en dos ejemplares del mismo tenor y valor, a los 18 días del mes de mayo de 2008.

Grupo de Estudios en Sistemas Tradicionales de Salud de la facultad de medicina de la Universidad del Rosario  
Centro de Estudios Médicos Interculturales (CEMI)

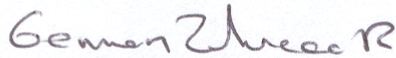

Germán Zuluaga R.  
Director General  
Investigador Principal

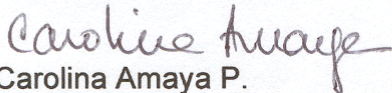

Carolina Amaya P.  
Investigadora asociada

Asociación de Autoridades Tradicionales Indígenas de la Zona de Yapú, ASATRIZY



Efraín R. Mejía A.  
Presidente

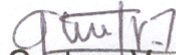

Gustavo Vargas B.  
Vicepresidente

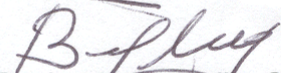

Benjamín Jaramillo G.  
Secretario



Ramiro Ardila  
Fiscal

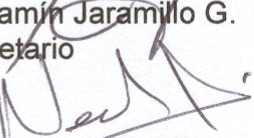

Nelson C. Muñoz L.  
Coord. Plan de vida

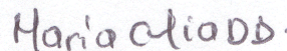

María C. Duque  
Coord. Mujeres



David Ramírez  
Suplente fiscal



**DYSMENORRHOEA AND INITIATION RITES AMONG  
INDIGENOUS WOMEN OF THE COLOMBIAN AMAZON: A  
CROSS-SECTIONAL STUDY**

|                                 |                                                                                                                                                                                                 |
|---------------------------------|-------------------------------------------------------------------------------------------------------------------------------------------------------------------------------------------------|
| Journal:                        | <i>BMJ Open</i>                                                                                                                                                                                 |
| Manuscript ID:                  | bmjopen-2012-002012.R1                                                                                                                                                                          |
| Article Type:                   | Research                                                                                                                                                                                        |
| Date Submitted by the Author:   | 05-Nov-2012                                                                                                                                                                                     |
| Complete List of Authors:       | Zuluaga, German; Universidad del Rosario, Escuela de Medicina; Cemi, General Direction<br>Andersson, Neil; Universidad Autónoma de Guerrero, Centro de Investigación de Enfermedades Tropicales |
| <b>Primary Subject Heading</b>: | Epidemiology                                                                                                                                                                                    |
| Secondary Subject Heading:      | Public health, Sexual health, Obstetrics and gynaecology                                                                                                                                        |
| Keywords:                       | Intercultural , Dysmenorrhoea, Medicine tradicional, Initiation rites                                                                                                                           |
|                                 |                                                                                                                                                                                                 |

SCHOLARONE™  
Manuscripts

1  
2  
3  
4  
5 **DYSMENORRHOEA AND INITIATION RITES AMONG INDIGENOUS WOMEN OF THE**  
6 **COLOMBIAN AMAZON: A CROSS-SECTIONAL STUDY**  
7  
8  
9

10 Germán Zuluaga, calle 12 no. 3A-21 (Cota – Colombia, SA), gzuluaga@cemi.org.co, 57  
11 3132625103 and 57 1 8777040.  
12  
13

14  
15  
16 Neil Andersson, Centro de Investigación de Enfermedades Tropicales (CIET), Universidad  
17 Autónoma de Guerrero, Calle Pino, El Roble, Acapulco México, andersson@ciet.org, 52 744  
18 488 0012 and 52 744 487 7230.  
19  
20

21 Germán Zuluaga, Escuela de Medicina y Ciencias de la Salud, Universidad del Rosario,  
22 Bogotá, Colombia.  
23  
24

25  
26 Neil Andersson, Universidad Autónoma de Guerrero, Centro de Investigación de  
27 Enfermedades Tropicales, Acapulco, México.  
28  
29

30  
31  
32 Keywords:

33 Intercultural

34  
35  
36 Dysmenorrhoea

37  
38  
39 Medicine, Traditional

40  
41  
42 Initiation rites  
43

44  
45  
46  
47  
48  
49  
50  
51  
52  
53  
54  
55  
56  
57  
58  
59  
60  
Word count: 2133

## ABSTRACT

**Objectives:** Investigate the association between dysmenorrhoea and the decline of female initiation rites among Amazonian indigenous peoples of Vaupés in Colombia.

**Design:** Cross-sectional study of all women in seven indigenous communities. Questionnaire administered in local language documented female initiation rites and experience of dysmenorrhoea. Analysis examined ten initiation components separately, then together, comparing women who underwent all rites, some rites and no rites.

**Settings:** Seven indigenous communities belonging to the Tukano language group in the Great Eastern Reservation of Vaupés (Colombia) in 2008.

**Participants:** All women over the age of 13 years living in the seven communities in Vaupés, who had experienced at least two menstruations.

**Primary and secondary outcome measures:** The analysis rested on pelvic pain to define dysmenorrhoea as main outcome. Women were also asked about other disorders present during menstruation or the precedent days, and about the interval between menstruation and its duration.

**Results:** Only 17.3% (32/185) completed all initiation rites and 52.4% (97/185) reported dysmenorrhoea. Women not completing the rites were more likely to report dysmenorrhoea than those who did so ( $p=0.01$  Fisher exact), taking into account age, education, community, parity, and use of family planning. Women who completed less than the full complement of rites had higher risk than those who completed all rites. Those who did not complete all rites reported increased severity of dysmenorrhoea ( $p=0.00014$ ).

**Conclusions:** Our results are compatible with a protective effect of initiation rites. We could exclude indirect associations with age, education, parity and use of family planning as explanations for the association. The study indicates feasibility, possible utility and limits of inter-cultural epidemiology in small groups.

## Article summary

### Article focus

- Female initiation rites and dysmenorrhoea.
- Epidemiology and cultural safety.

### Key messages

- There is an association between abandoning initiation rites and dysmenorrhoea.
- The study suggests effectiveness of traditional practice.
- The study proposes the feasibility and usefulness of intercultural epidemiology.

### Strengths and limitations of this study

- There are no epidemiological studies of indigenous initiation and dysmenorrhoea.
- The small numbers problem is recognized, even with all eligible women participating.

## INTRODUCTION

Qualitative research methods, like unstructured conversations, are relatively easily adapted to cultural contexts. This cultural adaptation is less common in epidemiology, which is often perceived as unreceptive to alternative epistemologies.[1] Yet inter-cultural epidemiology can be useful to identify potential health benefits of traditional health practices, many of which are being lost as globalization erodes indigenous cultures.

This loss of culture is a concern for Amazon indigenous communities, where every year people have less to do with traditional medical practices.[2] The Tatuyo, Bará, Carapana, Tuyuca y Tukano ethnicities in Tukano language group live between the Papurí and Yapú rivers in the Great Eastern Reservation of Vaupés.[3, 4] In collective reservations, the seven communities with very similar customs in a subsistence economy.[5] In the context of a decade long partnership with the traditional health systems group at Universidad del Rosario in Colombia, the indigenous authorities of these communities requested scientific support to study their loss of cultural practices and the effect of this on women's reproductive health, particularly dysmenorrhoea.

Problems related to women's reproductive cycle are increasing worldwide.[6-8] Western medicine has few satisfactory solutions to offer women with dysmenorrhoea, offering an interesting case in point as the World Health Organization calls to explore possible contributions of traditional medicine.[9-11] A sparse epidemiological literature addresses the links with dysmenorrhoea and cultural influences,[12, 13] ethnicity and religiosity.[14, 15] Better documented risk factors are diet, exercise, psychological or emotional episodes, and use of alcohol and tobacco.[16-20] We found no epidemiological studies of indigenous initiation rites and dysmenorrhoea.

## METHODS

**Study population:** All women over the age of 13 years living in the seven communities in Vaupés, who had experienced at least two menstruations in their lifetime.

**Outcome:** Interviewers asked if, during menstruation, women suffered pelvic pain, dizziness, headache, bodily pains, and problems in the days prior to menstruation. They also asked about the interval between menstruation and duration of menstruation. The analysis rested on pelvic pain to define dysmenorrhoea.[21-23] Because pain perception is subjective, we used a well-established graphic approach showing faces with different grades of discomfort

1  
2  
3  
4  
5 (Figure 1).[24] Respondents simply pointed to the face that reflected their experience during  
6 menstruation.  
7

8 **Exposure:** Traditional healers described initiation rites at the onset of menarche, lasting  
9 three to five days, during which time the young women completed a number of discrete  
10 activities: each initiate had a god-mother (*madrina*); each had a mentor during the initiation;  
11 the initiate spent 3-5 days away from others; she received a diet limited to specific foods; she  
12 received a blessing or prayer from the traditional healer; she applied powdered *carayurú*, a  
13 vegetable stain (*Arrhabidea chica*); her hair was cut; her body was painted with *we*, another  
14 vegetable stain (*Bignoniaceae sp.*); she inhaled *ají*, a hot spice mix (*Capsicum spp.*); and  
15 water or a plant precipitated emesis. The questionnaire documented exposure to each  
16 component rite (yes/no) separately. Without understanding the exact workings of the  
17 initiation rites, we followed the WHO guideline to handle the component activities as a “black  
18 box”[25]: we do not always have to understand exactly how a traditional therapy works to  
19 measure its effect.  
20  
21

22 **Instrument:** A month of consultation with local healers (*payés*) clarified the main research  
23 question and a list of culturally appropriate questions. After approval of the questionnaire for  
24 semantic and cultural equivalence with the *payés*, the researchers piloted it with 14 women  
25 of the same ethnic group living in Mitu (not part of the study). The authorities in each  
26 community invited all women – by cultural definition, the first menstruation identifies the  
27 woman as an adult -- to the communal hall (*maloka*) where the researchers explained the  
28 instrument, issues of confidentiality and the right to decline to participate or to leave out any  
29 question. No eligible woman declined to participate. Interviewers administered a 37-question  
30 instrument through a translator during December 2008.  
31  
32

33 **Analysis:** Epi-data 3.1 served for manual data capture analysis relied on CIETmap 2.0 beta  
34 8 (Centro de Investigación de Enfermedades Tropicales, Mexico), public domain software  
35 that provides a Windows-like interface with R. Bivariate analysis with each of the 10  
36 component activities examined the relationship of each component rite on its own with  
37 dysmenorrhoea. We also analysed complete and incomplete initiation using sequential  
38 stratification by age of the woman, community of origin (some had more access to Western  
39 ways), education, parity, family planning and menopause. We analysed trend using the  
40 Mantel extension of the Mantel-Haenszel test.[26] We report results as adjusted odds ratios  
41 (aOR) with 95% confidence intervals. The two-tailed Fisher exact test served for estimation  
42 of confidence with the resulting sparse numbers comparisons.  
43  
44  
45  
46  
47  
48  
49  
50  
51  
52  
53  
54  
55  
56  
57  
58  
59  
60



1  
2  
3  
4  
5 Without any prior basis for weighting importance of different activities in the initiation, we  
6 calculated the average effect across the ten components as though each was a separate  
7 exposure; this relied on Meta, an R program. A Forest plot summarises this (Figure 2).  
8 Compared with occurrence among women who completed all ten rites of initiation, a  
9 sensitivity analysis dropped each initiation rite in turn to test relevance of each in initiation.  
10  
11

12  
13 **Control of biases:** Involvement of healers and elders in the design guaranteed cultural fit.  
14 The questionnaire inquired for current family planning, and if so, which is the method used  
15 (plants, pill, injection, condom, pessary, surgery, partner-managed contraception), and  
16 duration of use of each method, as this could affect dysmenorrhoea; hormonal pills can  
17 diminish pain and IUDs can increase pain. Use of Western contraceptive methods also  
18 coincides with Western acculturation. We stratified by contraceptive use to separate between  
19 the effect of the contraceptive and the initiation rites. To avoid an acculturation bias from  
20 interviewing only women who did not go to nearby towns for work, we conducted the study in  
21 December when most return to their homes. We took age, menopause and education into  
22 account by stratification to limit the differential influence of these on responses.  
23  
24  
25  
26  
27

28  
29 **Ethical aspects:** The CIET ethical review committee at the Universidad Autónoma de  
30 Guerrero and Research Fund at the Universidad del Rosario in Colombia both approved the  
31 proposal. The leadership of each community signed formal agreements for data  
32 management and sharing with all participants present, after the researchers had explained to  
33 all the nature of the study, how data would be used, confidentiality, and rights to decline  
34 participation.[27]  
35  
36  
37  
38  
39

## 40 RESULTS

41  
42 A total of 185 women participated, representing 70.6% of the 262 women over the age of 12  
43 years identified in the 2006 census. The 77 women excluded had either migrated from the  
44 area or they had not completed two menstruations. Of 158 women who knew their age in  
45 years, the average was 32.5 years (mode 19 years, sd 15.6). Respondents reported low  
46 levels of education, 28.3% (52/184) with no schooling and only 17.4% (32/184 women  
47 interviewed) with secondary education. Few used family planning (11.1% based on 15/135  
48 women of reproductive age) with an average of 4.9 children each (SD 2.7).  
49

50  
51 The average age of menarche was 13.8 years (SD 1.16). Some 52% (97/185) reported  
52 dysmenorrhoea and 88.6% (164/185) reported undergoing at least some rite of initiation  
53  
54  
55  
56  
57  
58  
59  
60

during menarche. Table 1 shows the proportion involved in each of ten activities identified by traditional healers as the initiation rites. Considering each rite separately, only emesis retained a significant association on its own with dysmenorrhoea, after taking into account age of the woman, community of origin (some had more access to Western ways), parity, family planning by sequential stratification and adjusting for menopause and education. The Forest plot (Figure 2) shows dysmenorrhoea associated with each component rite compared with women who did no rites. The average effect size was OR 1.66 (95%CI 1.35-2.04).

Table 1: Exposure to different aspects of initiation rite and risk of dysmenorrhoea (odds ratio)

| Initiation rite                | % of all women receiving this rite** | Risk of dysmenorrhoea in each subgroup |                    |       |        |      |
|--------------------------------|--------------------------------------|----------------------------------------|--------------------|-------|--------|------|
|                                |                                      | Receiving rite                         | Not receiving rite | aOR*  | 95% CI |      |
| Emesis                         | 38.4%                                | 27/71                                  | 70/114             | 0.39* | 0.21   | 0.70 |
| Cared for during the ceremony  | 76.8%                                | 69/142                                 | 28/43              | 0.51  | 0.25   | 1.02 |
| Applied <i>carayurú</i> powder | 84.3%                                | 78/156                                 | 19/29              | 0.53  | 0.23   | 1.19 |
| Spent time in isolation        | 71.9%                                | 64/133                                 | 33/52              | 0.53  | 0.28   | 1.03 |
| Followed prescribed diet       | 71.9%                                | 64/133                                 | 33/52              | 0.53  | 0.28   | 1.03 |
| Body painted with <i>we</i>    | 50.8%                                | 44/94                                  | 53/91              | 0.63  | 0.35   | 1.12 |
| Had a godmother                | 50.8%                                | 45/94                                  | 50/88              | 0.70  | 0.39   | 1.25 |
| Cut hair                       | 68.6%                                | 64/127                                 | 33/58              | 0.77  | 0.41   | 1.45 |
| Inhaled <i>ají</i>             | 49.2%                                | 45/91                                  | 52/94              | 0.79  | 0.44   | 1.41 |
| Blessed by traditional healer  | 88.6%                                | 85/164                                 | 12/21              | 0.81  | 0.32   | 2.04 |

\* Adjusted for age and level of education in a stratified analysis..

\*\* Total 185 women; no missing data

To understand the role of each rite in relation to dysmenorrhoea, a sensitivity analysis compared dysmenorrhoea rates among women who did all ten rites (n=32) with women who participated in less than the ten, dropping each rite in turn. Figure 3 shows the unadjusted odds of dysmenorrhoea for all rites compared with failing to do specific rites, and those who did no rites. Those who completed the 10 rites (8/32) contrasted sharply with those who completed some or no rites (89/153) (p-Fisher 0.001).

Most respondents with dysmenorrhoea (92/97) reported severity using the Wong-Baker Faces Pain Rating Scale. Table 2 shows a statistically significant increase across five levels of severity for those who completed all rites compared with those who did any or no rites ( $p=0.0014$ ). It also contrasts those who did no rites with those who completed all rites ( $p=0.0039$ ).

Table 2 Completion of initiation rites and reported intensity of dysmenorrhoea

|                               | No dysmenorrhoea | Intensity of dysmenorrhoea                                              |              |              |              |
|-------------------------------|------------------|-------------------------------------------------------------------------|--------------|--------------|--------------|
|                               |                  | 0                                                                       | 1            | 2            | 3            |
| <b>Incomplete or no rites</b> | 64               | 18                                                                      | 20           | 19           | 27           |
| <b>All rites completed</b>    | 24               | 2                                                                       | 4            | 1            | 1            |
| <b>Total</b>                  | 88               | 20                                                                      | 24           | 20           | 28           |
| <b>OR</b>                     |                  | 3.94                                                                    | 3.49         | 6.76         | 6.92         |
| <b>95%CI</b>                  |                  | 1.72 - 9.00                                                             | 1.41 - 8.64  | 1.84 - 24.93 | 1.17 - 40.88 |
|                               |                  | Mantel-Haenszel chi square for linear trend = 10.16<br>p-value = 0.0014 |              |              |              |
|                               |                  |                                                                         |              |              |              |
| <b>No rites at all</b>        | 4                | 1                                                                       | 3            | 3            | 2            |
| <b>All rites completed</b>    | 24               | 2                                                                       | 4            | 1            | 1            |
| <b>Total</b>                  | 28               | 3                                                                       | 7            | 4            | 3            |
| <b>OR</b>                     |                  | 6.75                                                                    | 6.93         | 9.38         | 5.64         |
| <b>IC 95%</b>                 |                  | 1.72 - 26.42                                                            | 1.77 - 27.17 | 1.82 - 48.41 | 0.57 - 55.87 |
| <b>P-Fisher</b>               |                  | 0.01                                                                    | 0.01         | 0.02         | 0.2          |
|                               |                  | Mantel-Haenszel chi square for linear trend = 8.33;<br>p-value = 0.0039 |              |              |              |

## DISCUSSION

Our results support the idea that abandoning traditional initiation rites, or adopting practices that go along with abandoning these rites, is a risk factor for dysmenorrhoea. Emesis was the single strongest protective rite on its own, but sensitivity analysis showed a consistent effect of the other rites for those who did not abandon the initiation practices. The apparent lack of specific effects of each component rite supports the idea that synergy between all components completes the protective effect.

1  
2  
3  
4  
5 This study faced several common challenges in inter-cultural epidemiology. Even with all  
6 eligible women participating, the small numbers problem is well recognised[28-31] and has  
7 no easy solution. As anticipated, we found it difficult to untangle issues like use of  
8 contraceptives and reporting of age, given the effect of acculturation on these. Despite this  
9 interdependence of exposures, we believe we were able to show an independent effect of  
10 initiation rites.  
11  
12  
13

14 Inter-cultural approaches have received little attention in the epidemiological literature, and  
15 these need further investment. In this study, the indigenous leaders of the seven  
16 communities requested the study and set the research question; they specified the cultural  
17 exposures of interest; they participated in the design and testing of instruments; they led the  
18 interpretation of results; and they are the primary research users, sharing the results with  
19 their communities in support of traditional health practices.  
20  
21  
22  
23

24 In these important dynamics, the research was culturally safe. Even so, cultural issues  
25 probably reduced the effectiveness of the study and reduced the numbers further. The 14.6%  
26 (27/185) of women who could not give their age in calendar years is testimony to their  
27 distance from Western culture. Analysing only those who mention an age included a cultural  
28 filter, limiting our conclusions to those with some measure of Western acculturation.  
29  
30  
31

32 The average age of menarche of our sample was higher than typically reported in the  
33 literature,[32-37] possibly indicating a relatively low level of secular change.[38, 39] That one  
34 half of the women reported dysmenorrhoea (97/185) is lower than reported in international  
35 studies.[40-44] Although the local definition (facial expressions) was useful for internal  
36 comparisons, it is of limited value in international comparisons.  
37  
38  
39

40 We tried to take account of other acculturation issues, beyond initiation rites, by stratifying for  
41 education, age, parity, community of residence (some had greater access to modern towns)  
42 and use of family planning. The lower risk associated with initiation rites might still be due to  
43 unmeasured lifestyle issues associated with maintaining initiation rites. Resolving this  
44 requires a randomised controlled trial that supports initiation rites in some communities and  
45 not in others, measuring decrease in dysmenorrhoea as the outcome.  
46  
47  
48  
49

50 Since the 1950s, public health programmes have contemplated primary, secondary and  
51 tertiary prevention.[45] More recently, *primordial prevention* identified social, economic and  
52 cultural patterns that affect risks.[46, 47] Albeit with limitations, our study suggests that  
53 primary or primordial prevention of dysmenorrhoea might be possible for indigenous women  
54  
55  
56  
57  
58  
59  
60

1  
2  
3  
4  
5 who are increasingly in contact with Western ways.  
6  
7

## 8 9 **CONCLUSIONS**

10 Without adding insight into exact mechanisms, this cross-sectional study shows an  
11 association between abandoning initiation rites and dysmenorrhoea. No one of the rites on  
12 its own explains this association. The study suggests feasibility and usefulness of inter-  
13 cultural epidemiology: a longer term dialogue led to the research question and design; the  
14 indigenous leaders defined the exposure of interest; the ethical review process fitted with  
15 indigenous ethical concepts; it generated evidence suggesting an effective traditional  
16 practice, without understanding how this works.  
17  
18  
19  
20  
21  
22  
23  
24  
25  
26  
27  
28  
29  
30  
31  
32  
33  
34  
35  
36  
37  
38  
39  
40  
41  
42  
43  
44  
45  
46  
47  
48  
49  
50  
51  
52  
53  
54  
55  
56  
57  
58  
59  
60

## ACKNOWLEDGMENTS

Field work was financed by The Research Fund of Universidad del Rosario. Benedicto Mejía and Efraín Mejía, along with other *payés* (wise men, healers) from the seven communities participated in formulation of research questions, design, application of the instrument and interpretation of results. Alicia Jaramillo and Guillermina Ferrer translated the questions during the application of the instrument. Carolina Amaya and Natalia Reinoso carried out the pilot study and the research instrument application in the seven communities. Iván Sarmiento helped with data analysis, tables and figures elaboration and revision of citations and bibliographic references. Andrés Cañón and Sebastián Luna collaborated with the systematic review of cultural risk factors for dysmenorrhea.

## COMPETING INTERESTS

We, the authors, declare that there are no conflicts of interest in this study regarding the Indigenous communities that took part, the recognised rights of the Indigenous Peoples, or the financing institutions.

## FUNDING

Fieldwork was financed by The Research Fund of Universidad del Rosario. Germán Zuluaga, MD, MSc carried out the research project as part fulfilment of the requirements of MSc (Epidemiology) at the Universidad Autónoma de Guerrero.

## FIGURE LEGENDS

Figure 1: Wong-Baker Faces Pain Rating Scale

Figure 2: Forest plot of individual initiation rites and risk of dysmenorrhoea

Figure 3: Sensitivity analysis compared dysmenorrhoea risk among women who did all ten rites (n=32) compared with women who did not do at least one rite, and those who did no rite (listing shows excluded rites)

## REFERENCE LIST

---

1. Cameron M, Andersson N, and Ledogar RJ. Culturally safe epidemiology: oxymoron or scientific imperative. *Pimatisiwin: Journal of Aboriginal and Indigenous Community Health* 2010;**8**(2):89-116.
2. Piñeros-Petersen M, Ruiz-Salguero M. Aspectos demográficos en comunidades indígenas de tres regiones de Colombia. *Salud Pública Mex* 1998;**40**:324-329.
3. Dirección de Etnias del Ministerio del Interior y de Justicia. *Resolución no. 0006 de 26 de enero de 2005, por medio de la cual se inscribe en el registro de asociaciones de autoridades tradicionales y/o cabildos la constitución de la asociación de autoridades tradicionales indígenas de la zona de Yapú - ASATRIZY*. Bogotá (CO): Min. Int. Just, 2005.
4. Asociación de Autoridades Tradicionales Indígenas de la Zona de Yapú. *Plan de vida: unidos con un Solo pensamiento para vivir bien*. Sarmiento I, Amaya C, eds. Bogotá (CO): Asoc. de Aut. Trad. Indíg. de la Zona de Yapú, 2008.
5. Asociación de Autoridades Tradicionales Indígenas de la Zona de Yapú. *Historia y origen del proceso de un Nuevo despertar*. Sarmiento I, Amaya C, eds. Bogotá (CO): Asoc. de Aut. Trad. Indíg. de la Zona de Yapú, 2008.
6. World Health Organization. *Engaging for Health. 11th General Program of Work 2006-2015, a Global Health Agenda*. Geneva (CH): WHO, 2006. (Working paper GPW/2006-2015). Available at: [http://whqlibdoc.who.int/publications/2006/GPW\\_eng.pdf](http://whqlibdoc.who.int/publications/2006/GPW_eng.pdf). Accessed October 15, 2008.
7. Rodríguez J. *Descripción de la mortalidad por departamentos: Colombia año 2000*. Bogotá (CO): Pontificia Universidad Javeriana, Cendex. (Working Paper ASS /DT 016-05). Available at: <http://www.cendex.org.co/pdf/DT016-05.pdf>. Accessed January 15, 2008.
8. Cuevas E. *Mortalidad materna, Colombia 2005: análisis de la información de la vigilancia rutinaria*. In: Inf. quincenal Epidemiológico Nac. Bogotá (CO): Ministerio de Protección Social, Dir. General de Salud Pública; 2007 Mar 15. 12(5):65-80. (Inf. quincenal Epidemiol Nal.).
9. World Health Organization. *Traditional Medicine and Health Coverage*. Geneva (CH): WHO, 1983.
10. World Health Organization. *WHO Traditional Medicine Strategy: 2002-2005*. Geneva,

1  
2  
3  
4  
5 (CH): WHO, 2002.  
6

7 11. Organización Panamericana de la Salud, División de Desarrollos de Sistemas y  
8 Servicios de Salud. *Fortalecimiento y desarrollo de los sistemas de salud tradicionales: plan*  
9 *de acción 1995-1998*. Washington: OPS, 1995.  
10

11 12. Garg S, Sharma N, Sahay R. Socio-cultural aspects of menstruation in an urban slum  
12 in Delhi, India. *Reprod Health Matters* 2001;**9**:16-25.  
13

14 13. Avasarala AK, Panchangam S. Dysmenorrhoea in different settings: are the rural and  
15 urban adolescent girls perceiving and managing the dysmenorrhoea problem differently?  
16 *Indian J Community Med* 2008;**33**:246-249.  
17

18 14. Goldstein-Ferber S, Granot M. The association between somatization and perceived  
19 ability: roles in dysmenorrhea among israeli arab adolescents. *Psychosom Med*  
20 2006;**68**:136-142.  
21

22 15. Marván ML, Vacio A, García-Yañez G, *et al*. Attitudes toward menarche among  
23 mexican preadolescents. *Women Health* 2007;**46**:7-23.  
24

25 16. Latthe P, Mignini L, Gray R, *et al*. Factors predisposing women to chronic pelvic pain:  
26 systematic review. *BMJ* 2006;**332**:749-755.  
27

28 17. Patel A, Tanksale V, Sahasrabhojane M, *et al*. The burden and determinants of  
29 dysmenorrhoea: a population-based survey of 2262 women in Goa, India. *BJOG*  
30 2006;**113**:453-463.  
31

32 18. Balbi C, Musone R, Menditto A, *et al*. Influence of menstrual factors and dietary habits  
33 on menstrual pain in adolescence age. *Eur J Obstet Gynecol Reprod Biol* 2000;**91**:143-148.  
34

35 19. Proctor ML, Murphy PA. Herbal and dietary therapies for primary and secondary  
36 dysmenorrhoea. *Cochrane Database Syst Rev* 2001;**(3)**:CD002124.  
37

38 20. Parazzini F, Tozzi L, Mezzopane R, *et al*. Cigarette smoking, alcohol consumption,  
39 and risk of primary dysmenorrhea. *Epidemiology* 1994;**5**:469-472.  
40

41 21. Mazza D. *Women's Health in General Practice*. Oxford: Butterworth Heinemann,  
42 2004.  
43

44 22. Deb Sh, Raine-Fenning N. Dysmenorrhoea. *Obstetrics, Gynaecology and*  
45 *Reproductive Medicine* 2008;**18**:294-299.  
46

47 23. Dawood MY. Primary dysmenorrhoea: advances in pathogenesis and management.  
48  
49  
50  
51  
52  
53  
54  
55  
56  
57  
58  
59  
60



1  
2  
3  
4  
5  
6  
7  
8  
9  
10  
11  
12  
13  
14  
15  
16  
17  
18  
19  
20  
21  
22  
23  
24  
25  
26  
27  
28  
29  
30  
31  
32  
33  
34  
35  
36  
37  
38  
39  
40  
41  
42  
43  
44  
45  
46  
47  
48  
49  
50  
51  
52  
53  
54  
55  
56  
57  
58  
59  
60

*Obstet Gynecol* 2006;**108**:428-441.

24. Wong D, Whaley L. *Clinical handbook of pediatric nursing*. 2nd ed. Saint Louis (MO): Mosby Company, 1986. Quoted by: National Institutes of Health, NIH Pain Consortium. Pain intensity scales – Wong-Baker faces pain rating scale [NIH Pain Consortium Web site]. July 17, 2007.

[http://painconsortium.nih.gov/pain\\_scales/Wong-Baker\\_Faces.pdf](http://painconsortium.nih.gov/pain_scales/Wong-Baker_Faces.pdf) (accessed 24 April 2012).

25. World Health Organization. *General Guidelines for Methodologies on Research and Evaluation of Traditional Medicine*. Geneva (CH): WHO, 2000. (Working paper WHO/EDM/TRM/2000.1)

26. Dean AG, Sullivan KM, Soe MM. OpenEpi: Open Source Epidemiologic Statistics for Public Health, Version 2.3.1.

[www.OpenEpi.com](http://www.OpenEpi.com) (accessed 23 August 2012).

27. Grupo de Estudios en Sistemas Tradicionales de Salud. Principios éticos para estudios médicos aplicados a los sistemas tradicionales de salud [CEMI Web site], 2008.

[http://www.cemi.org.co/images/PRINCIPIOS\\_ETICOS\\_GESTS\\_CEMI.pdf](http://www.cemi.org.co/images/PRINCIPIOS_ETICOS_GESTS_CEMI.pdf) (accessed 14 Jun 2010).

28. Andresen EM, Diehr PH, Luke DA. Public health surveillance of low-frequency populations. *Annu Rev Public Health* 2004;**25**:25-52.

29. Friedsam D. *Racial and Ethnic Data: are They Reliable for Program and Policy Development?*. Madison (Wis): Population Health Institute, University of Wisconsin, 2002. Wisconsin Public Health and Health Policy Institute Issue Brief Vol. 3 no. 5.

30. Landau LB, Roever S. The Burden of Representation in Humanitarian Contexts: Survey Research on Mobile and Marginal Populations. Wits (ZA): Forced Migration Studies Programme, University of the Witwatersrand; 2004. (Working paper no. 10).

[http://migration.org.za/research/downloads/papers/10\\_landauroever.pdf](http://migration.org.za/research/downloads/papers/10_landauroever.pdf) (accessed 21 January 2008).

31. Monasta L, Andersson N, Ledogar RJ, *et al*. Minority health and small numbers epidemiology: a case study of living conditions and health of children in five foreign Roma camps in Italy. *Am J Public Health* 2008;**98**:2035-2041.

32. Vera Y, Hidalgo G, Gollo O, *et al*. Edad de la menarquia y su relación con el estrato

- 1  
2  
3  
4  
5 social en cinco estados venezolanos. *Acta Cient Estud* 2009;**7**:130-135.
- 6  
7 33. Ulate G. Edad de la menarquia en el Valle Central de Costa Rica y factores  
8 asociados a su aparición. *Rev Costarric Cienc Med* 1995;**16**:37-41.
- 9  
10 34. Fonseca J, Aguilar O. Edad de la Menarquia en San Pedro Sula. *Rev Med Hondur*  
11 1991;**59**: 4-7.
- 12  
13 35. Hernández I, Unanue N, Gaete X, *et al.* Edad de la menarquia y su relación con el  
14 nivel socioeconómico e índice de masa corporal. *Rev Med Chil* 2007;**135**:1429-1436.
- 15  
16 36. Sharma N, Vaid S, Manhas A. Age at menarche in two caste groups (brahmins and  
17 rajputs) from rural areas of Jammu. *Anthropologist* 2006;**8**:55-7.
- 18  
19 37. Romans SE, Martin JM, Gendall K, *et al.* Age of menarche: the role of some  
20 psychosocial factors. *Psychol Med* 2003;**33**:933-939.
- 21  
22 38. Padez C. Social background and age at menarche in portuguese university students:  
23 a note on the secular changes in Portugal. *Am J Hum Biol* 2003;**15**:415-427.
- 24  
25 39. Tanner JM. *Growth at Adolescence*. 2nd ed. Oxford: Blackwell, 1962. Quoted by:  
26 Korah L. Knowledge and perceptions regarding menstruation among adolescent girls: a  
27 research study. *Nurs J India* 1991;**82**:205-209.
- 28  
29 40. Woods NF, Most A, Dery GK. Prevalence of perimenstrual symptoms. *Am J Public*  
30 *Health* 1982;**72**:1257-1264.
- 31  
32 41. Klein JR, Litt IF. Epidemiology of adolescent dysmenorrhea. *Pediatrics* 1981;**68**:661-  
33 664.
- 34  
35 42. Wilson CA, Keye WRJ. A survey of adolescent dysmenorrhea and premenstrual  
36 symptom frequency, a model program for prevention, detection, and treatment. *J Adolesc*  
37 *Health Care*. 1989;**10**:317-322.
- 38  
39 43. Jamieson D, Steege J. Prevalence of dysmenorrhoea, dyspareunia, pelvic pain and  
40 irritable bowle syndrome in primary care practices. *Obstet Gynecol* 1996;**87**:55-58.
- 41  
42 44. Latthe P, Latthe M, Say L, *et al.* WHO systematic review of prevalence of chronic  
43 pelvic pain: a neglected reproductive health morbidity. *BMC Public Health* 2006;**6**:177.
- 44  
45 45. Blanco J, Maya J, eds. *Fundamentos de salud pública, Tomo 1, salud pública*.  
46 Medellín (CO): Corporación para Investigaciones Biológicas, 1997.
- 47  
48 46. Beaglehole R, Bonita R, Kjellstrom T. *Epidemiología básica*. Washington: OPS, 2003.
- 49  
50  
51  
52  
53  
54  
55  
56  
57  
58  
59  
60

1  
2  
3  
4  
5 47. García-Pérez H, Harlow SD, Erdmann CA, Denman C. Pelvic pain and associated  
6 characteristics among women in northern Mexico. *Int Perspect Sex Reprod Health*.  
7 2010;**36**:90-8.  
8  
9  
10  
11  
12  
13  
14  
15  
16  
17  
18  
19  
20  
21  
22  
23  
24  
25  
26  
27  
28  
29  
30  
31  
32  
33  
34  
35  
36  
37  
38  
39  
40  
41  
42  
43  
44  
45  
46  
47  
48  
49  
50  
51  
52  
53  
54  
55  
56  
57  
58  
59  
60

For peer review only

1  
2  
3  
4  
5  
6  
7  
8 **INSIGHTS FROM INTER-CULTURAL EPIDEMIOLOGY: A CROSS-SECTIONAL STUDY**  
9 **OF DYSMENORRHOEA AND INITIATION RITES AMONG INDIGENOUS WOMEN OF THE**  
10 **COLOMBIAN AMAZON: A CROSS-SECTIONAL STUDY**  
11

12  
13  
14 Germán Zuluaga, calle 12 no. 3A-21 (Cota – Colombia, SA), gzuluaga@cemi.org.co, 57  
15 3132625103 and 57 1 8777040.  
16

17  
18  
19 Neil Andersson, [Centro de Investigación de Enfermedades Tropicales \(CIET\), Universidad](#)  
20 [Autónoma de Guerrero, Calle Pino, El Roble, Acapulco México](#), andersson@ciet.org, 52 744  
21 488 0012 and 52 744 487 7230.  
22

23  
24 Germán Zuluaga, Escuela de Medicina y Ciencias de la Salud, Universidad del Rosario,  
25 Bogotá, Colombia.  
26

27  
28  
29 Neil Andersson, Universidad Autónoma de Guerrero, Centro de Investigación de  
30 Enfermedades Tropicales, Acapulco, México.  
31

32  
33 Keywords:

34 Intercultural

35 Dysmenorrhoea

36 Medicine, Traditional

37 Initiation rites  
38  
39  
40  
41  
42

43 Word count: 2133  
44  
45  
46  
47  
48  
49  
50  
51  
52  
53  
54  
55  
56  
57  
58  
59  
60

Comment [Germán Zu1]: From the managing editor: please remove the first part of the title as this does not really add anything specific that assists the reader.  
>>Done

## ABSTRACT

**Objectives:** Investigate the association between dysmenorrhoea and the decline of female initiation rites among Amazonian indigenous peoples of Vaupés in Colombia.

**Design:** Cross-sectional study of all women in seven indigenous communities. Questionnaire administered in local language documented female initiation rites and experience of dysmenorrhoea. Analysis examined ten initiation components separately, then together, comparing women who underwent all rites, some rites and no rites.

**Settings:** Seven indigenous communities belonging to the Tukano language group in the Great Eastern Reservation of Vaupés (Colombia) in 2008.

**Participants:** All women over the age of 13 years living in the seven communities in Vaupés, who had experienced at least two menstruations.

**Primary and secondary outcome measures:** The analysis rested on pelvic pain to define dysmenorrhoea as main outcome. Women were also asked about other disorders present during menstruation or the precedent days, and about the interval between menstruation and its duration.

**Results:** Only 17.3% (32/185) completed all initiation rites and 52.4% (97/185) reported dysmenorrhoea. Women not completing the rites were more likely to report dysmenorrhoea than those who did so ( $p=0.01$  Fisher exact), taking into account age, education, community, parity, and use of family planning. Women who completed less than the full complement of rites had higher risk than those who completed all rites. Those who did not complete all rites reported increased severity of dysmenorrhoea ( $p=0.00014$ ).

**Conclusions:** Our results are compatible with a protective effect of initiation rites. We could exclude indirect associations with age, education, parity and use of family planning as explanations for the association. The study indicates feasibility, possible utility and limits of inter-cultural epidemiology in small groups.

**Comment [Germán Zu2]:** HGP: Abstracts. In page 2, row 19 the authors indicate that data collection took place in 2009 yet in page 5, row 31 they also mention that data collection was completed on December 2008. This point needs clarification. CORRECTED

## Article summary

### Article focus

#### ~~Cross-sectional study 2009.~~

- Female initiation rites and dysmenorrhoea.
- Epidemiology and cultural safety.

### Key messages

- ~~There is an~~ association between abandoning initiation rites and dysmenorrhoea.
- ~~The study suggests an effectiveness of ity of a~~ traditional practice.
- ~~The study proposes the~~ suggests feasibility and usefulness of ~~an~~ intercultural epidemiology.

### Strengths and limitations of this study

- ~~There are n~~No epidemiological studies of indigenous initiation and dysmenorrhoea.
- ~~The small numbers problem is recognized, e~~Even with all eligible women participating ~~the small numbers problem is recognized.~~

## INTRODUCTION

Qualitative research methods, like unstructured conversations, are relatively easily adapted to cultural contexts. This cultural adaptation is less common in epidemiology, which is often perceived as unreceptive to alternative epistemologies.[1] Yet inter-cultural epidemiology can be useful to identify potential health benefits of traditional health practices, many of which are being lost as globalization erodes indigenous cultures.

This loss of culture is a concern for Amazon indigenous communities, where every year people have less to do with traditional medical practices.[2] The Tatuyo, Bará, Carapana, Tuyuca y Tukano ethnicities in Tukano language group live between the Papurí and Yapú rivers in the Great Eastern Reservation of Vaupés.[3, 4] In collective reservations, the seven communities with very similar customs in a subsistence economy.[5] In the context of a decade long partnership with the traditional health systems group at Universidad del Rosario in Colombia, the indigenous authorities of these communities requested scientific support to study their loss of cultural practices and the effect of this on women's reproductive health, particularly dysmenorrhoea.

Problems related to women's reproductive cycle are increasing worldwide.[6-8] Western medicine has few satisfactory solutions to offer women with dysmenorrhoea, offering an interesting case in point as the World Health Organization calls to explore possible contributions of traditional medicine.[9-11] A sparse epidemiological literature addresses the links with dysmenorrhoea and cultural influences,[12, 13] ethnicity and religiosity.[14, 15] Better documented risk factors are diet, exercise, psychological or emotional episodes, and use of alcohol and tobacco.[16-20] We found no epidemiological studies of indigenous initiation rites and dysmenorrhoea.

## METHODS

**Study population:** All women over the age of 13 years living in the seven communities in Vaupés, who had experienced at least two menstruations in their lifetime.

**Outcome:** Interviewers asked if, during menstruation, women suffered pelvic pain, dizziness, headache, bodily pains, and problems in the days prior to menstruation. They also asked about the interval between menstruation and duration of menstruation. The analysis rested on pelvic pain to define dysmenorrhoea.[21-23] Because pain perception is subjective, we used a well-established graphic approach showing faces with different grades of discomfort

**Comment [Germán Zu3]:** KEM: Article summary needs copy editing: Main focus is not on cross sectional study 2009.  
>copy editing done

Key messages and strength and limitations of the study are not in complete sentences. Difficult to understand.  
>CORRECTED

**Comment [Germán Zu4]:** KEM: Introduction: why is qualitative research mentioned in the first sentence of the introduction? Is it important?

>Qualitative studies have been able to adapt more easily to intercultural perspectives. The first sentence simply sets up the second

**Comment [Germán Zu5]:** KEM: Descriptive data were not provided in full for appraisal.  
> the references provide this detailed information

**Comment [Germán Zu6]:** HGP: Women's sampling criteria were defined as "all women over the age of 13 years who had experienced at least two menstruations". The authors need to clarify the specific time frame used, for example at least two menstruation during last year.  
>>clarified

1  
2  
3  
4  
5  
6  
7  
8 (Figure 1).[24] Respondents simply pointed to the face that reflected their experience during  
9 menstruation.  
10

11 **Exposure:** Traditional healers described initiation rites at the onset of menarche, lasting  
12 three to five days, during which time the young women completed a number of discrete  
13 activities: each initiate had a god-mother (*madrina*); each had a mentor during the initiation;  
14 the initiate spent 3-5 days away from others; she received a diet limited to specific foods; she  
15 received a blessing or prayer from the traditional healer; she applied powdered *carayurú*, a  
16 vegetable stain (*Arrhabidea chica*); her hair was cut; her body was painted with *we*, another  
17 vegetable stain (*Bignoniaceae sp.*); she inhaled ají, a hot spice mix (*Capsicum spp.*); and  
18 water or a plant precipitated emesis. The questionnaire documented exposure to each  
19 component rite (yes/no) separately. Without understanding the exact workings of the  
20 initiation rites, we followed the WHO guideline to handle the component activities as a “black  
21 box”[25]: we do not always have to understand exactly how a traditional therapy works to  
22 measure its effect.  
23  
24  
25  
26

27  
28 **Instrument:** A month of consultation with local healers (*payés*) clarified the main research  
29 question and a list of culturally appropriate questions. After approval of the questionnaire for  
30 semantic and cultural equivalence with the *payés*, the researchers piloted it with 14 women  
31 of the same ethnic group living in Mitu (not part of the study). The authorities in each  
32 community invited all women – by cultural definition, the first menstruation identifies the  
33 woman as an adult -- to the communal hall (*maloka*) where the researchers explained the  
34 instrument, issues of confidentiality and the right to decline to participate or to leave out any  
35 question. No eligible woman declined to participate. Interviewers administered a 37-question  
36 instrument through a translator during December 2008.  
37  
38  
39

40 **Analysis:** Epi-data 3.1 served for manual data capture analysis relied on CIETmap 2.0 beta  
41 8 (Community Information and Epidemiological Technologies, New YorkCentro de  
42 Investigación de Enfermedades Tropicales, Mexico), public domain software that provides a  
43 Windows-like interface with R. Bivariate analysis with each of the 10 component activities  
44 examined the relationship of each component rite on its own with dysmenorrhoea. We also  
45 analysed complete and incomplete initiation using sequential stratification by age of the  
46 woman, community of origin (some had more access to Western ways), education, parity,  
47 family planning and menopause. We analysed trend using the Mantel extension of the  
48 Mantel-Haenszel test.[26] We report results as adjusted odds ratios (aOR) with 95%  
49 confidence intervals. The two-tailed Fisher exact test served for estimation of confidence with  
50  
51  
52  
53  
54  
55  
56  
57  
58  
59  
60

**Comment [Germán Zu7]:** KEM: How was the quality of the translation of the 37 item questionnaire ensured for semantic and cultural equivalence?  
>>Clarified in the text



the resulting sparse numbers comparisons.

Without any prior basis for weighting importance of different activities in the initiation, we calculated the average effect across the ten components as though each was a separate exposure; this relied on Meta, an R program. A Forest plot summarises this (Figure 2). Compared with occurrence among women who completed all ten rites of initiation, a sensitivity analysis dropped each initiation rite in turn to test relevance of each in initiation.

**Control of biases:** Involvement of healers and elders in the design guaranteed cultural fit.

The questionnaire documented-inquired for type-of-current family planning, and if so, which is the method used (~~none~~, plants, pill, injection, condom, pessary, surgery, partner-managed contraception), and duration of use of each method, as this could affect dysmenorrhoea; hormonal pills can diminish pain and IUDs can increase pain. Use of Western contraceptive methods also coincides with Western acculturation. We stratified by contraceptive use to separate between the effect of the contraceptive and the initiation rites. To avoid an acculturation bias from interviewing only women who did not go to nearby towns for work, we conducted the study in December when most return to their homes. We took age, menopause and education into account by stratification to limit the differential influence of these on responses.

**Ethical aspects:** The CIET ethical review committee at the Universidad Autónoma de Guerrero and Research Fund at the Universidad del Rosario in Colombia both approved the proposal. The leadership of each community signed formal agreements for data management and sharing with all participants present, after the researchers had explained to all the nature of the study, how data would be used, confidentiality, and rights to decline participation.[27]

## RESULTS

A total of 185 women participated, representing 70.6% of the 262 women over the age of 12 years identified in the 2006 census. The 77 women excluded had either migrated from the area or they had not completed two menstruations. Of 158 women who knew their age in years, the average was 32.5 years (mode 19 years, sd 15.6). Respondents reported low levels of education, 28.3% (52/184) with no schooling and only 17.43% (32/184 women interviewed) with secondary education. Few used family planning (11.1% based on 15/135 women of reproductive age) with an average of 4.9 children each (SD 2.7).

**Comment [Germán Zu8]:** HGP: Also, the authors should provide a more clear definition of all the independent variables: contraceptive use (current or 12 months contraceptive use?)  
>>Done

**Comment [Germán Zu9]:** HGP: Also, the authors should clarify (page 6, row 39 and 40) whether the percent of women in the categories of education were computed in a population of 184 or 185 women.  
>>Done

**Comment [Germán Zu10]:** KEM: Missing number for family planning is big.  
>>This question was only asked of 135 women in their reproductive years, no clarified in the text.

The average age of menarche was 13.8 years (SD 1.16). Some 52% (97/185) reported dysmenorrhoea and 88.6% (164/185) reported undergoing at least some rite of initiation during menarche. Table 1 shows the proportion involved in each of ten activities identified by traditional healers as the initiation rites. Considering each rite separately, only emesis retained a significant association on its own with dysmenorrhoea, after taking into account age of the woman, community of origin (some had more access to Western ways), parity, family planning by sequential stratification and adjusting for menopause and education. The Forest plot (Figure 2) shows dysmenorrhoea associated with each component rite compared with women who did no rites. The average effect size was OR 1.66 (95%CI 1.35-2.04).

Table 1: Exposure to different aspects of initiation rite and risk of dysmenorrhoea (odds ratio)

| Initiation rite                | % of all women receiving this rite** | Risk of dysmenorrhoea in each subgroup |                     |                              |                                                       |
|--------------------------------|--------------------------------------|----------------------------------------|---------------------|------------------------------|-------------------------------------------------------|
|                                |                                      | SiReceiving rite                       | Not receivin g rite | aOR*                         | 95% CI                                                |
| Emesis                         | 38.4%                                | 27/71                                  | 70/114              | <u>2.59</u><br><u>0.39</u> * | <u>1.42</u><br><u>0.21</u> <u>4.75</u><br><u>0.70</u> |
| Cared for during the ceremony  | 76.8%                                | 69/142                                 | 28/43               | <u>1.97</u><br><u>0.51</u>   | <u>0.98</u><br><u>0.25</u> <u>3.99</u><br><u>1.02</u> |
| Applied <i>carayurú</i> powder | 84.3%                                | 78/156                                 | 19/29               | <u>1.9</u><br><u>0.53</u>    | <u>0.84</u><br><u>0.23</u> <u>4.32</u><br><u>1.19</u> |
| Spent time in isolation        | 71.9%                                | 64/133                                 | 33/52               | <u>1.87</u><br><u>0.53</u>   | <u>0.97</u><br><u>0.28</u> <u>3.64</u><br><u>1.03</u> |
| Followed prescribed diet       | 71.9%                                | 64/133                                 | 33/52               | <u>1.87</u><br><u>0.53</u>   | <u>0.97</u><br><u>0.28</u> <u>3.64</u><br><u>1.03</u> |
| Body painted with we           | 50.8%                                | 44/94                                  | 53/91               | <u>1.58</u><br><u>0.63</u>   | <u>0.89</u><br><u>0.35</u> <u>2.83</u><br><u>1.12</u> |
| Had a godmother                | 50.8%                                | 45/94                                  | 50/88               | <u>1.43</u><br><u>0.70</u>   | <u>0.8</u><br><u>0.39</u> <u>2.57</u><br><u>1.25</u>  |
| Cut hair                       | 68.6%                                | 64/127                                 | 33/58               | <u>1.3</u><br><u>0.77</u>    | <u>0.69</u><br><u>0.41</u> <u>2.43</u><br><u>1.45</u> |
| Inhaled <i>aji</i>             | 49.2%                                | 45/91                                  | 52/94               | <u>1.27</u><br><u>0.79</u>   | <u>0.71</u><br><u>0.44</u> <u>2.26</u><br><u>1.41</u> |
| Blessed by traditional healer  | 88.6%                                | 85/164                                 | 12/21               | <u>0.81</u>                  | <u>0.49</u><br><u>0.32</u> <u>3.4</u><br><u>2.04</u>  |

\* Adjusted for age and level of education, after in a stratified analysis.

\*\* Total 185 women; no missing data.

To understand the role of each rite in relation to dysmenorrhoea, a sensitivity analysis compared dysmenorrhoea rates among women who did all ten rites (n=32) with women who participated in less than the ten, dropping each rite in turn. Figure 3 shows the unadjusted odds of dysmenorrhoea for all rites compared with failing to do specific rites, and those who did no rites. Those who completed the 10 rites (8/32) contrasted sharply with those who

**Comment [Germán Zu11]:** HGP: Table 1. It is no clear whether table 1 is describing the "risk" of experiencing dysmenorrhoea or its absence. The title of the table should clearly state that the values correspond to odds ratios. >>title changed to clarify this

**Formatted Table**

**Comment [Germán Zu12]:** HGP: The study reports an OR of 2.59 for the initiation rite of emesis. Table 1 suggests that there is an increase in the odds of dysmenorrhoea for this initiation rite but in the abstract and in the conclusion it is stated that emesis has a protective effect. If this is the case, then values should be presented in a more standard way with an OR below 1 and the information should indicate what the reference group is. >>Corrected

**Comment [Germán Zu13]:** HGP: In its current state the table does not communicate well how the adjustment by age and education was computed. >Done

**Comment [Germán Zu14]:** KEM: Table 1, % of each rites were given but not number (N) and the total N to account for missing values. Please provide this for each items. >>Clarified with a footnote to table

completed some or no rites (89/153) (p-Fisher 0.001).

Most respondents with dysmenorrhoea (92/97) reported severity using the Wong-Baker Faces Pain Rating Scale. Table 2 shows a statistically significant increase across five levels of severity for those who completed all rites compared with those who did any or no rites (p=0.0014). It also contrasts those who did no rites with those who completed all rites (p=0.0039).

Table 2 Completion of initiation rites and reported intensity of dysmenorrhoea

|                               | No dysmenorrhoea | Intensity of dysmenorrhoea                                              |              |              |              |
|-------------------------------|------------------|-------------------------------------------------------------------------|--------------|--------------|--------------|
|                               |                  | 0                                                                       | 1            | 2            | 3            |
| <b>Incomplete or no rites</b> | 64               | 18                                                                      | 20           | 19           | 27           |
| <b>All rites completed</b>    | 24               | 2                                                                       | 4            | 1            | 1            |
| <b>Total</b>                  | 88               | 20                                                                      | 24           | 20           | 28           |
| <b>OR</b>                     |                  | 3.94                                                                    | 3.49         | 6.76         | 6.92         |
| <b>95%CI</b>                  |                  | 1.72 - 9.00                                                             | 1.41 - 8.64  | 1.84 - 24.93 | 1.17 - 40.88 |
|                               |                  | Mantel-Haenszel chi square for linear trend = 10.16<br>p-value = 0.0014 |              |              |              |
| <b>No rites at all</b>        | 4                | 1                                                                       | 3            | 3            | 2            |
| <b>All rites completed</b>    | 24               | 2                                                                       | 4            | 1            | 1            |
| <b>Total</b>                  | 28               | 3                                                                       | 7            | 4            | 3            |
| <b>OR</b>                     |                  | 6.75                                                                    | 6.93         | 9.38         | 5.64         |
| <b>IC 95%</b>                 |                  | 1.72 - 26.42                                                            | 1.77 - 27.17 | 1.82 - 48.41 | 0.57 - 55.87 |
| <b>P-Fisher</b>               |                  | 0.01                                                                    | 0.01         | 0.02         | 0.2          |
|                               |                  | Mantel-Haenszel chi square for linear trend = 8.33;<br>p-value = 0.0039 |              |              |              |

## DISCUSSION

Our results support the idea that abandoning traditional initiation rites, or adopting practices that go along with abandoning these rites, is a risk factor for dysmenorrhoea. Emesis was the single strongest protective rite on its own, but sensitivity analysis showed a consistent effect of the other rites for those who did not abandon the initiation practices. The apparent lack of

**Comment [Germán Zu15]:** KEM: Table 3 (assuming it is the table below table 2 as there is no label) results were singled out to no rites compared with all rites. This would introduce bias to the result  
Table 2 and 3. The number of those with severe intensity was only 1. There will be problem with the significance analysis  
>> Tables have been consolidated. The sparse data do affect the analysis, but the trend is still significant however we set the contrast.

**Comment [Germán Zu16]:** HGP: Table 2 and the remaining charts don't add much to the analysis. In my opinion it does not make sense to include table 2 because the 95% CI are not only very wide but also because several of these interval overlap each other. It is not clear what the intentions of the authors are, with the inclusion of this material.  
KEM: Table 2. There was 180/185 that had a response to rites, which was not described in the text.  
How is the intensity of dysmenorrhoea categorized? (table 2) what is 4y5?  
>> 180 women responded to the scale of severity; this i show intensity was categorised. We feel the table adds a useful confirmatory dimensión, suggesting that severity is also associated with rites.

1  
2  
3  
4  
5  
6  
7  
8 specific effects of each component rite supports the idea that synergy between all  
9 components completes the protective effect.  
10

11 This study faced several common challenges in inter-cultural epidemiology. Even with all  
12 eligible women participating, the small numbers problem is well recognised[28-31] and has  
13 no easy solution. As anticipated, we found it difficult to untangle issues like use of  
14 contraceptives and reporting of age, given the effect of acculturation on these. Despite this  
15 interdependence of exposures, we believe we were able to show an independent effect of  
16 initiation rites.  
17  
18

19 Inter-cultural approaches have received little attention in the epidemiological literature, and  
20 these need further investment. In this study, the indigenous leaders of the seven  
21 communities requested the study and set the research question; they specified the cultural  
22 exposures of interest; they participated in the design and testing of instruments; they led the  
23 interpretation of results; and they are the primary research users, sharing the results with  
24 their communities in support of traditional health practices.  
25  
26  
27

28 In these important dynamics, the research was culturally safe. Even so, cultural issues  
29 probably reduced the effectiveness of the study and reduced the numbers further. The 14.6%  
30 (27/185) of women who could not give their age in calendar years is testimony to their  
31 distance from Western culture. Analysing only those who mention an age included a cultural  
32 filter, limiting our conclusions to those with some measure of Western acculturation.  
33  
34

35 The average age of menarche of our sample was higher than typically reported in the  
36 literature,[32-37] possibly indicating a relatively low level of secular change.[38, 39] That one  
37 half of the women reported dysmenorrhoea (97/185) is lower than reported in international  
38 studies.[40-44] Although the local definition (facial expressions) was useful for internal  
39 comparisons, it is of limited value in international comparisons.  
40  
41

42 We tried to take account of other acculturation issues, beyond initiation rites, by stratifying for  
43 education, age, parity, community of residence (some had greater access to modern towns)  
44 and use of family planning. The lower risk associated with initiation rites might still be due to  
45 unmeasured lifestyle issues associated with maintaining initiation rites. Resolving this  
46 requires a randomised controlled trial that supports initiation rites in some communities and  
47 not in others, measuring decrease in dysmenorrhoea as the outcome.  
48  
49

50 Since the 1950s, public health programmes have contemplated primary, secondary and  
51 tertiary prevention.[45] More recently, *primordial prevention* identified social, economic and  
52  
53  
54  
55  
56  
57  
58  
59  
60

1  
2  
3  
4  
5  
6  
7  
8  
9  
10  
11  
12  
13  
14  
15  
16  
17  
18  
19  
20  
21  
22  
23  
24  
25  
26  
27  
28  
29  
30  
31  
32  
33  
34  
35  
36  
37  
38  
39  
40  
41  
42  
43  
44  
45  
46  
47  
48  
49  
50  
51  
52  
53  
54  
55  
56  
57  
58  
59  
60

cultural patterns that affect risks.<sup>[46,47]</sup> Albeit with limitations, our study suggests that primary or primordial prevention of dysmenorrhoea might be possible for indigenous women who are increasingly in contact with Western ways.

## CONCLUSIONS

Without adding insight into exact mechanisms, this cross-sectional study shows an association between abandoning initiation rites and dysmenorrhoea. No one of the rites on its own explains this association. The study suggests feasibility and usefulness of inter-cultural epidemiology: a longer term dialogue led to the research question and design; the indigenous leaders defined the exposure of interest; the ethical review process fitted with indigenous ethical concepts; it generated evidence suggesting an effective traditional practice, without understanding how this works.

## ACKNOWLEDGMENTS

Field work was financed by The Research Fund of Universidad del Rosario. Benedicto Mejía and Efraín Mejía, along with other *payés* (wise men, healers) from the seven communities participated in formulation of research questions, design, application of the instrument and interpretation of results. Alicia Jaramillo and Guillermina Ferrer translated the questions during the application of the instrument. Carolina Amaya and Natalia Reinoso carried out the pilot study and the research instrument application in the seven communities. Iván Sarmiento helped with data analysis, tables and figures elaboration and revision of citations and bibliographic references. Andrés Cañón and Sebastián Luna collaborated with the systematic review of cultural risk factors for dysmenorrhea.

## COMPETING INTERESTS

We, the authors, declare that there are no conflicts of interest in this study regarding the Indigenous communities that took part, the recognised rights of the Indigenous Peoples, or the financing institutions.

## FUNDING

Fieldwork was financed by The Research Fund of Universidad del Rosario. Germán Zuluaga, MD, MSc carried out the research project as part fulfilment of the requirements of MSc (Epidemiology) at the Universidad Autónoma de Guerrero.

## FIGURE LEGENDS

Figure 1: Wong-Baker Faces Pain Rating Scale

Figure 2: Forest plot of individual initiation rites and risk of dysmenorrhoea

Figure 3: Sensitivity analysis compared dysmenorrhoea risk among women who did all ten rites (n=32) compared with women who did not do at least one rite, and those who did no rite (listing shows excluded rites)

1  
2  
3  
4  
5  
6  
7  
8  
9  
10  
11  
12  
13  
14  
15  
16  
17  
18  
19  
20  
21  
22  
23  
24  
25  
26  
27  
28  
29  
30  
31  
32  
33  
34  
35  
36  
37  
38  
39  
40  
41  
42  
43  
44  
45  
46  
47  
48  
49  
50  
51  
52  
53  
54  
55  
56  
57  
58  
59  
60

## REFERENCE LIST

---

1. Cameron M, Andersson N, and Ledogar RJ. Culturally safe epidemiology: oxymoron or scientific imperative. *Pimatisiwin: Journal of Aboriginal and Indigenous Community Health* 2010;**8**(2):89-116.
2. Piñeros-Petersen M, Ruiz-Salguero M. Aspectos demográficos en comunidades indígenas de tres regiones de Colombia. *Salud Pública Mex* 1998;**40**:324-329.
3. Dirección de Etnias del Ministerio del Interior y de Justicia. *Resolución no. 0006 de 26 de enero de 2005, por medio de la cual se inscribe en el registro de asociaciones de autoridades tradicionales y/o cabildos la constitución de la asociación de autoridades tradicionales indígenas de la zona de Yapú - ASATRIZY*. Bogotá (CO): Min. Int. Just, 2005.
4. Asociación de Autoridades Tradicionales Indígenas de la Zona de Yapú. *Plan de vida: unidos con un Solo pensamiento para vivir bien*. Sarmiento I, Amaya C, eds. Bogotá (CO): Asoc. de Aut. Trad. Indíg. de la Zona de Yapú, 2008.
5. Asociación de Autoridades Tradicionales Indígenas de la Zona de Yapú. *Historia y origen del proceso de un Nuevo despertar*. Sarmiento I, Amaya C, eds. Bogotá (CO): Asoc. de Aut. Trad. Indíg. de la Zona de Yapú, 2008.
6. World Health Organization. *Engaging for Health. 11th General Program of Work 2006-2015, a Global Health Agenda*. Geneva (CH): WHO, 2006. (Working paper GPW/2006-2015). Available at: [http://whqlibdoc.who.int/publications/2006/GPW\\_eng.pdf](http://whqlibdoc.who.int/publications/2006/GPW_eng.pdf). Accessed October 15, 2008.
7. Rodríguez J. *Descripción de la mortalidad por departamentos: Colombia año 2000*. Bogotá (CO): Pontificia Universidad Javeriana, Cendex. (Working Paper ASS /DT 016-05). Available at: <http://www.cendex.org.co/pdf/DT016-05.pdf>. Accessed January 15, 2008.
8. Cuevas E. *Mortalidad materna, Colombia 2005: análisis de la información de la vigilancia rutinaria*. In: Inf. quincenal Epidemiológico Nac. Bogotá (CO): Ministerio de Protección Social, Dir. General de Salud Pública; 2007 Mar 15. 12(5):65-80. (Inf. quincenal Epidemiol Nal.).
9. World Health Organization. *Traditional Medicine and Health Coverage*. Geneva (CH): WHO, 1983.
10. World Health Organization. *WHO Traditional Medicine Strategy: 2002-2005*. Geneva,

1  
2  
3  
4  
5  
6  
7  
8 (CH): WHO, 2002.  
9

10 11. Organización Panamericana de la Salud, División de Desarrollos de Sistemas y  
11 Servicios de Salud. *Fortalecimiento y desarrollo de los sistemas de salud tradicionales: plan*  
12 *de acción 1995-1998*. Washington: OPS, 1995.  
13

14 12. Garg S, Sharma N, Sahay R. Socio-cultural aspects of menstruation in an urban slum  
15 in Delhi, India. *Reprod Health Matters* 2001;**9**:16-25.  
16

17 13. Avasarala AK, Panchangam S. Dysmenorrhoea in different settings: are the rural and  
18 urban adolescent girls perceiving and managing the dysmenorrhoea problem differently?  
19 *Indian J Community Med* 2008;**33**:246-249.  
20

21 14. Goldstein-Ferber S, Granot M. The association between somatization and perceived  
22 ability: roles in dysmenorrhea among israeli arab adolescents. *Psychosom Med*  
23 2006;**68**:136-142.  
24

25 15. Marván ML, Vacio A, García-Yañez G, *et al*. Attitudes toward menarche among  
26 mexican preadolescents. *Women Health* 2007;**46**:7-23.  
27

28 16. Latthe P, Mignini L, Gray R, *et al*. Factors predisposing women to chronic pelvic pain:  
29 systematic review. *BMJ* 2006;**332**:749-755.  
30

31 17. Patel A, Tanksale V, Sahasrabhojane M, *et al*. The burden and determinants of  
32 dysmenorrhoea: a population-based survey of 2262 women in Goa, India. *BJOG*  
33 2006;**113**:453-463.  
34

35 18. Balbi C, Musone R, Menditto A, *et al*. Influence of menstrual factors and dietary habits  
36 on menstrual pain in adolescence age. *Eur J Obstet Gynecol Reprod Biol* 2000;**91**:143-148.  
37

38 19. Proctor ML, Murphy PA. Herbal and dietary therapies for primary and secondary  
39 dysmenorrhoea. *Cochrane Database Syst Rev* 2001;**(3)**:CD002124.  
40

41 20. Parazzini F, Tozzi L, Mezzopane R, *et al*. Cigarette smoking, alcohol consumption,  
42 and risk of primary dysmenorrhea. *Epidemiology* 1994;**5**:469-472.  
43

44 21. Mazza D. Women's Health in General Practice. Oxford: Butterworth Heinemann,  
45 2004.  
46

47 22. Deb Sh, Raine-Fenning N. Dysmenorrhoea. *Obstetrics, Gynaecology and*  
48 *Reproductive Medicine* 2008;**18**:294-299.  
49

50 23. Dawood MY. Primary dysmenorrhoea: advances in pathogenesis and management.  
51  
52  
53  
54  
55  
56  
57  
58  
59  
60



1  
2  
3  
4  
5  
6  
7  
8 *Obstet Gynecol* 2006;**108**:428-441.

9  
10 24. Wong D, Whaley L. *Clinical handbook of pediatric nursing*. 2nd ed. Saint Louis (MO):  
11 Mosby Company, 1986. Quoted by: National Institutes of Health, NIH Pain Consortium. Pain  
12 intensity scales – Wong-Baker faces pain rating scale [NIH Pain Consortium Web site]. July  
13 17, 2007.

14  
15 [http://painconsortium.nih.gov/pain\\_scales/Wong-Baker\\_Faces.pdf](http://painconsortium.nih.gov/pain_scales/Wong-Baker_Faces.pdf) (accessed 24 April 2012).

16  
17 25. World Health Organization. *General Guidelines for Methodologies on Research and*  
18 *Evaluation of Traditional Medicine*. Geneva (CH): WHO, 2000. (Working paper  
19 WHO/EDM/TRM/2000.1)

20  
21 26. Dean AG, Sullivan KM, Soe MM. OpenEpi: Open Source Epidemiologic Statistics for  
22 Public Health, Version 2.3.1.

23  
24 [www.OpenEpi.com](http://www.OpenEpi.com) (accessed 23 August 2012).

25  
26 27. Grupo de Estudios en Sistemas Tradicionales de Salud. Principios éticos para  
27 estudios médicos aplicados a los sistemas tradicionales de salud [CEMI Web site], 2008.

28  
29 [http://www.cemi.org.co/images/PRINCIPIOS\\_ETICOS\\_GESTS\\_CEMI.pdf](http://www.cemi.org.co/images/PRINCIPIOS_ETICOS_GESTS_CEMI.pdf) (accessed 14 Jun  
30 2010).

31  
32 28. Andresen EM, Diehr PH, Luke DA. Public health surveillance of low-frequency  
33 populations. *Annu Rev Public Health* 2004;**25**:25-52.

34  
35 29. Friedsam D. *Racial and Ethnic Data: are They Reliable for Program and Policy*  
36 *Development?*. Madison (Wis): Population Health Institute, University of Wisconsin, 2002.  
37 Wisconsin Public Health and Health Policy Institute Issue Brief Vol. 3 no. 5.

38  
39 30. Landau LB, Roever S. The Burden of Representation in Humanitarian Contexts:  
40 Survey Research on Mobile and Marginal Populations. Wits (ZA): Forced Migration Studies  
41 Programme, University of the Witwatersrand; 2004. (Working paper no. 10).

42  
43 [http://migration.org.za/research/downloads/papers/10\\_landauroever.pdf](http://migration.org.za/research/downloads/papers/10_landauroever.pdf) (accessed 21  
44 January 2008).

45  
46 31. Monasta L, Andersson N, Ledogar RJ, *et al*. Minority health and small numbers  
47 epidemiology: a case study of living conditions and health of children in five foreign Roma  
48 camps in Italy. *Am J Public Health* 2008;**98**:2035-2041.

49  
50 32. Vera Y, Hidalgo G, Gollo O, *et al*. Edad de la menarquia y su relación con el estrato  
51  
52  
53  
54  
55  
56  
57  
58  
59  
60

1  
2  
3  
4  
5  
6  
7  
8 social en cinco estados venezolanos. *Acta Cient Estud* 2009;**7**:130-135.

9  
10 33. Ulate G. Edad de la menarquia en el Valle Central de Costa Rica y factores  
11 asociados a su aparición. *Rev Costarric Cienc Med* 1995;**16**:37-41.

12  
13 34. Fonseca J, Aguilar O. Edad de la Menarquia en San Pedro Sula. *Rev Med Hondur*  
14 1991;**59**: 4-7.

15  
16 35. Hernández I, Unanue N, Gaete X, *et al*. Edad de la menarquia y su relación con el  
17 nivel socioeconómico e índice de masa corporal. *Rev Med Chil* 2007;**135**:1429-1436.

18  
19 36. Sharma N, Vaid S, Manhas A. Age at menarche in two caste groups (brahmins and  
20 rajputs) from rural areas of Jammu. *Anthropologist* 2006;**8**:55-7.

21  
22 37. Romans SE, Martin JM, Gendall K, *et al*. Age of menarche: the role of some  
23 psychosocial factors. *Psychol Med* 2003;**33**:933–939.

24  
25 38. Padez C. Social background and age at menarche in portuguese university students:  
26 a note on the secular changes in Portugal. *Am J Hum Biol* 2003;**15**:415-427.

27  
28 39. Tanner JM. *Growth at Adolescence*. 2nd ed. Oxford: Blackwell, 1962. Quoted by:  
29 Korah L. Knowledge and perceptions regarding menstruation among adolescent girls: a  
30 research study. *Nurs J India* 1991;**82**:205-209.

31  
32 40. Woods NF, Most A, Dery GK. Prevalence of perimenstrual symptoms. *Am J Public*  
33 *Health* 1982;**72**:1257-1264.

34  
35 41. Klein JR, Litt IF. Epidemiology of adolescent dysmenorrhea. *Pediatrics* 1981;**68**:661-  
36 664.

37  
38 42. Wilson CA, Keye WRJ. A survey of adolescent dysmenorrhea and premenstrual  
39 symptom frequency, a model program for prevention, detection, and treatment. *J Adolesc*  
40 *Health Care*. 1989;**10**:317-322.

41  
42 43. Jamieson D, Steege J. Prevalence of dysmenorrhoea, dyspareunia, pelvic pain and  
43 irritable bowle syndrome in primary care practices. *Obstet Gynecol* 1996;**87**:55-58.

44  
45 44. Latthe P, Latthe M, Say L, *et al*. WHO systematic review of prevalence of chronic  
46 pelvic pain: a neglected reproductive health morbidity. *BMC Public Health* 2006;**6**:177.

47  
48 45. Blanco J, Maya J, eds. *Fundamentos de salud pública, Tomo 1, salud pública*.  
49 Medellín (CO): Corporación para Investigaciones Biológicas, 1997.

50  
51 46. Beaglehole R, Bonita R, Kjellstrom T. *Epidemiología básica*. Washington: OPS, 2003.

1  
2  
3  
4  
5  
6  
7  
8  
9  
10  
11  
12  
13  
14  
15  
16  
17  
18  
19  
20  
21  
22  
23  
24  
25  
26  
27  
28  
29  
30  
31  
32  
33  
34  
35  
36  
37  
38  
39  
40  
41  
42  
43  
44  
45  
46  
47  
48  
49  
50  
51  
52  
53  
54  
55  
56  
57  
58  
59  
60

47. [García-Pérez H, Harlow SD, Erdmann CA, Denman C. Pelvic pain and associated characteristics among women in northern Mexico. \*Int Perspect Sex Reprod Health\*. 2010;\*\*36\*\*:90-8.](#)

For peer review only

1  
2  
3  
4  
5  
6  
7  
8  
9  
10  
11  
12  
13  
14  
15  
16  
17  
18  
19  
20  
21  
22  
23  
24  
25  
26  
27  
28  
29  
30  
31  
32  
33  
34  
35  
36  
37  
38  
39  
40  
41  
42  
43  
44  
45  
46  
47  
48  
49  
50  
51  
52  
53  
54  
55  
56  
57  
58  
59  
60

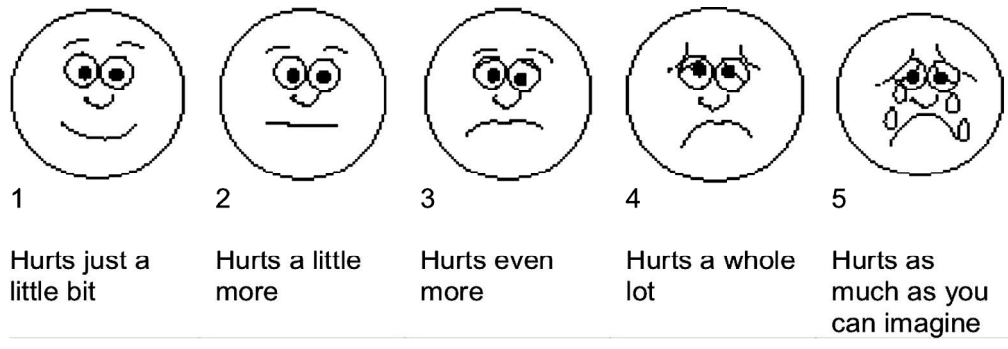

Wong-Baker Faces Pain Rating Scale  
180x59mm (300 x 300 DPI)

peer review only

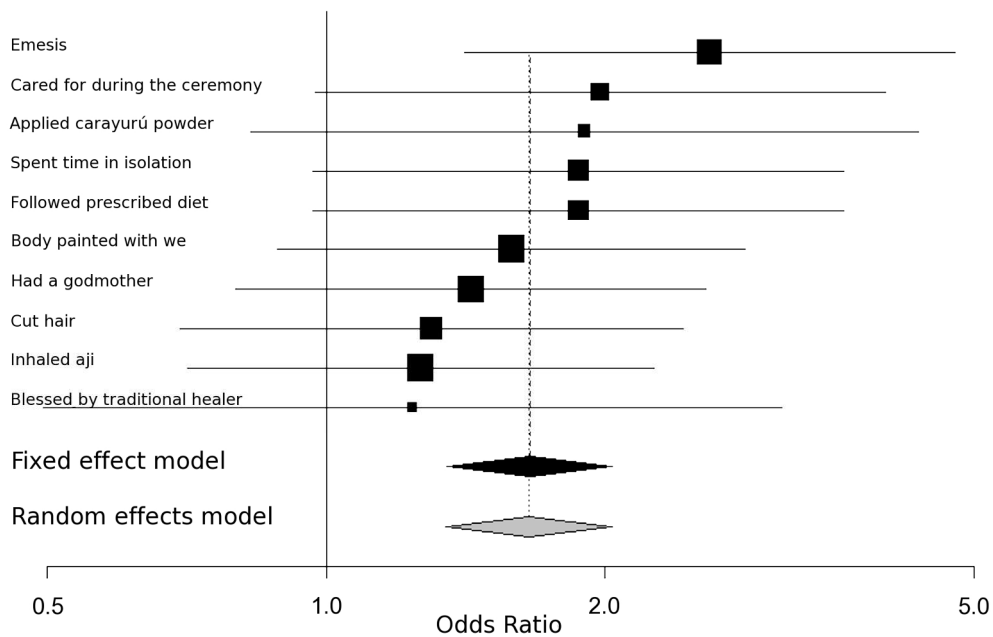

Forest plot of individual initiation rites and risk of dysmenorrhoea  
180x114mm (300 x 300 DPI)

Review only

1  
2  
3  
4  
5  
6  
7  
8  
9  
10  
11  
12  
13  
14  
15  
16  
17  
18  
19  
20  
21  
22  
23  
24  
25  
26  
27  
28  
29  
30  
31  
32  
33  
34  
35  
36  
37  
38  
39  
40  
41  
42  
43  
44  
45  
46  
47  
48  
49  
50  
51  
52  
53  
54  
55  
56  
57  
58  
59  
60

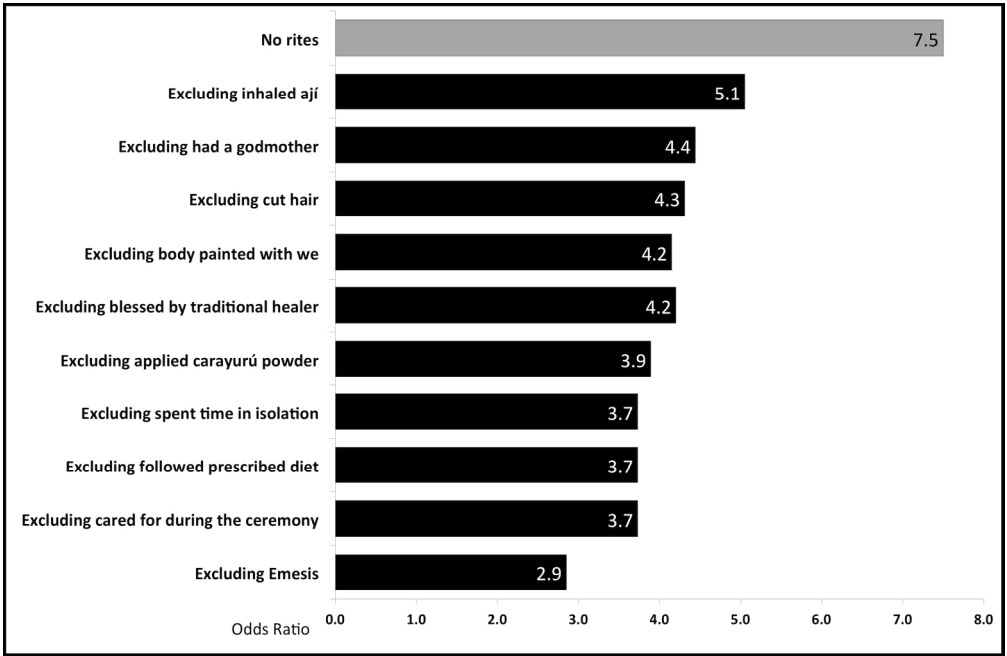

Sensitivity analysis compared dysmenorrhoea risk among women who did all ten rites (n=32) compared with women who did not do at least one rite, and those who did no rite (listing shows excluded rites)  
180x117mm (300 x 300 DPI)

STROBE 2007 (v4) Statement—Checklist of items that should be included in reports of *cross-sectional studies*

| Section/Topic            | Item # | Recommendation                                                                                                                                                                       | Reported on page #                                                      |
|--------------------------|--------|--------------------------------------------------------------------------------------------------------------------------------------------------------------------------------------|-------------------------------------------------------------------------|
| Title and abstract       | 1      | (a) Indicate the study's design with a commonly used term in the title or the abstract                                                                                               | "Cross-sectional studies" appears in title                              |
|                          |        | (b) Provide in the abstract an informative and balanced summary of what was done and what was found                                                                                  | Structured abstract provided                                            |
| <b>Introduction</b>      |        |                                                                                                                                                                                      |                                                                         |
| Background/rationale     | 2      | Explain the scientific background and rationale for the investigation being reported                                                                                                 | Abstract and para 1 and 3 of introduction (p3)                          |
| Objectives               | 3      | State specific objectives, including any prespecified hypotheses                                                                                                                     | Abstract and para 2 Introduction (p3)                                   |
| <b>Methods</b>           |        |                                                                                                                                                                                      |                                                                         |
| Study design             | 4      | Present key elements of study design early in the paper                                                                                                                              | Abstract, paras 1 and 3 of Introduction (p1), para 1 of Discussion (p7) |
| Setting                  | 5      | Describe the setting, locations, and relevant dates, including periods of recruitment, exposure, follow-up, and data collection                                                      | Methods (p3 and p4)                                                     |
| Participants             | 6      | (a) Give the eligibility criteria, and the sources and methods of selection of participants                                                                                          | First para of Methods, p3                                               |
| Variables                | 7      | Clearly define all outcomes, exposures, predictors, potential confounders, and effect modifiers. Give diagnostic criteria, if applicable                                             | Paras 2-3 of Methods (p3 and p4), and para 2 of Discussion (p8)         |
| Data sources/measurement | 8*     | For each variable of interest, give sources of data and details of methods of assessment (measurement). Describe comparability of assessment methods if there is more than one group | Paras 2-3 of Methods (p3 and p4)                                        |
| Bias                     | 9      | Describe any efforts to address potential sources of bias                                                                                                                            | Para 7 of Methods (p5)                                                  |
| Study size               | 10     | Explain how the study size was arrived at                                                                                                                                            | Para 2 of Discussion (p7), all available women were included.           |

|                        |     |                                                                                                                                                                                                              |                                                                             |
|------------------------|-----|--------------------------------------------------------------------------------------------------------------------------------------------------------------------------------------------------------------|-----------------------------------------------------------------------------|
| Quantitative variables | 11  | Explain how quantitative variables were handled in the analyses. If applicable, describe which groupings were chosen and why                                                                                 | Abstract, paras 2, 3, 5, 6 of Methods (p3 and p4), para 5 Discussion (p8)   |
| Statistical methods    | 12  | (a) Describe all statistical methods, including those used to control for confounding                                                                                                                        | Paras 5-6 of Methods (p4)                                                   |
|                        |     | (b) Describe any methods used to examine subgroups and interactions                                                                                                                                          | Para 6 of Discussion (p8)                                                   |
|                        |     | (c) Explain how missing data were addressed                                                                                                                                                                  | Para 1 of Results (p5)                                                      |
|                        |     | (d) If applicable, describe analytical methods taking account of sampling strategy                                                                                                                           | Paras 5-6 of Methods (p4)                                                   |
|                        |     | (e) Describe any sensitivity analyses                                                                                                                                                                        | Para 3 of Results (Figure 3) (p6)                                           |
| <b>Results</b>         |     |                                                                                                                                                                                                              |                                                                             |
| Participants           | 13* | (a) Report numbers of individuals at each stage of study—eg numbers potentially eligible, examined for eligibility, confirmed eligible, included in the study, completing follow-up, and analysed            | Para 1 of Results (p5), para 1 of methods (p3)                              |
|                        |     | (b) Give reasons for non-participation at each stage                                                                                                                                                         | Para 1 of Results (p5)                                                      |
|                        |     | (c) Consider use of a flow diagram                                                                                                                                                                           | Not applicable                                                              |
| Descriptive data       | 14* | (a) Give characteristics of study participants (eg demographic, clinical, social) and information on exposures and potential confounders                                                                     | Para 2 of Introduction (p3), para 1 of Methods (p3), para 1 of Results (p5) |
|                        |     | (b) Indicate number of participants with missing data for each variable of interest                                                                                                                          | Para 1 of Results (p5)                                                      |
| Outcome data           | 15* | Report numbers of outcome events or summary measures                                                                                                                                                         | Para 2-5 of Results (p5 and p6)                                             |
| Main results           | 16  | (a) Give unadjusted estimates and, if applicable, confounder-adjusted estimates and their precision (eg, 95% confidence interval). Make clear which confounders were adjusted for and why they were included | Tables 1 and 2                                                              |
|                        |     | (b) Report category boundaries when continuous variables were categorized                                                                                                                                    | Tables 1 and 2                                                              |
|                        |     | (c) If relevant, consider translating estimates of relative risk into absolute risk for a meaningful time period                                                                                             | Not Applicable                                                              |
| Other analyses         | 17  | Report other analyses done—eg analyses of subgroups and interactions, and sensitivity analyses                                                                                                               | Table 2 and Figure 2                                                        |
| <b>Discussion</b>      |     |                                                                                                                                                                                                              |                                                                             |
| Key results            | 18  | Summarise key results with reference to study objectives                                                                                                                                                     | Paras 2, 4, 5 of Results (p5 and p6), para 5 of Discussion (p8)             |



|                          |    |                                                                                                                                                                            |                                                                                                        |
|--------------------------|----|----------------------------------------------------------------------------------------------------------------------------------------------------------------------------|--------------------------------------------------------------------------------------------------------|
| Limitations              | 19 | Discuss limitations of the study, taking into account sources of potential bias or imprecision. Discuss both direction and magnitude of any potential bias                 | Abstract, para 1 of Introduction (p3), para 7 of Methods (p5), paras 2 and 5 of Discussion (p7 and p8) |
| Interpretation           | 20 | Give a cautious overall interpretation of results considering objectives, limitations, multiplicity of analyses, results from similar studies, and other relevant evidence | Abstract and Discussion                                                                                |
| Generalisability         | 21 | Discuss the generalisability (external validity) of the study results                                                                                                      | Paras 2, 3, 5 and 7 of Discussion (p7 and p8)                                                          |
| <b>Other information</b> |    |                                                                                                                                                                            |                                                                                                        |
| Funding                  | 22 | Give the source of funding and the role of the funders for the present study and, if applicable, for the original study on which the present article is based              | P9                                                                                                     |

\*Give information separately for cases and controls in case-control studies and, if applicable, for exposed and unexposed groups in cohort and cross-sectional studies.

**Note:** An Explanation and Elaboration article discusses each checklist item and gives methodological background and published examples of transparent reporting. The STROBE checklist is best used in conjunction with this article (freely available on the Web sites of PLoS Medicine at <http://www.plosmedicine.org/>, Annals of Internal Medicine at <http://www.annals.org/>, and Epidemiology at <http://www.epidem.com/>). Information on the STROBE Initiative is available at [www.strobe-statement.org](http://www.strobe-statement.org).

## CONVENIO PARA COMPARTIR INFORMACIÓN

**ENTRE:** La Asociación de Autoridades Tradicionales Indígenas de la Zona de Yapú, ASATRIZY, representada por su Junta Directiva.

**Y:** El Grupo de Estudios en Sistemas Tradicionales de Salud de la Facultad de Medicina de la Universidad del Rosario (GESTS) y el Centro de Estudios Médicos Interculturales (CEMI), representados por su director.

### 1. Preámbulo

El presente convenio reconoce y respeta el derecho a la autodeterminación de los pueblos indígenas de la zona de Yapú, en el marco de los cinco derechos fundamentales de los pueblos indígenas reconocidos por la Constitución Política de 1991, la Ley 21 de 1991 de la República de Colombia, aprobatoria del Convenio # 169 de la Organización Internacional del Trabajo, y su naturaleza jurídica de entidad de derecho público de carácter especial, que incluye la potestad para tomar decisiones sobre investigación en sus comunidades. Se considera que los beneficios a las comunidades, a cada región y al esfuerzo nacional se deben fortalecer por medio de la investigación, culturalmente sensible. La investigación tiene que facilitar la propiedad y el manejo por parte de las comunidades de la información sobre su salud y contribuir con la promoción de estilos de vida saludables, prácticas y planeación efectiva de programas, en el marco de sus Planes de Vida.

### 2. Propósito

El presente convenio define los términos para compartir información entre Asatriza y el GESTS, en relación con los datos recogidos en el *Estudio epidemiológico para un programa de intervención en atención primaria de salud para la promoción y prevención de las enfermedades relacionadas con el ciclo reproductivo de las mujeres indígenas en comunidades del Vaupés*, (en adelante el Proyecto). El propósito del presente convenio es formalizar un acuerdo entre ASATRIZY y el GESTS, respecto de la ejecución del proyecto de investigación, incluyendo la propiedad y el manejo de todos los datos recogidos como parte del proyecto.

### 3. Antecedentes

La Asociación de Autoridades Tradicionales Indígenas de la Zona de Yapú está conformada por siete capitanías vecinas a los ríos Papurí, Yapú y Caño Colorado, en el departamento del Vaupés y tiene como propósito impulsar y liderar la ejecución del Plan de Vida promoviendo la cultura, los valores y las normas tradicionales de manera que permita el desarrollo integral y la conservación física y cultural de la comunidad.

El Grupo de Estudios en Sistemas Tradicionales de Salud de la facultad de medicina de la Universidad del Rosario, reconocido formalmente por COLCIENCIAS desde el año 2002, tiene como objetivo aportar al estudio, conservación, recuperación y promoción de los sistemas médicos tradicionales para contribuir al mejoramiento de la salud humana.

El Centro de Estudios Médicos Interculturales, CEMI, es una organización no gubernamental colombiana, sin ánimo de lucro, cuyo objetivo es contribuir al desarrollo de una política intercultural de salud, mediante el estudio, la evaluación, el diseño y la aplicación de estrategias de atención en las que se amplía la noción del concepto salud-enfermedad, considerando los aspectos culturales y ambientales.

1  
2  
3  
4 Integrantes del GESTS y del CEMI vienen acompañando a las comunidades indígenas de Yapú  
5 en su proceso de organización, diseño y ejecución del Plan de Vida, siempre procurando la  
6 protección de la diversidad biológica y la defensa de la cultura y los conocimientos  
7 tradicionales. En noviembre de 2007 Asatrizy y el CEMI firmaron un convenio de  
8 acompañamiento que tiene vigencia hasta junio de 2009, el cual incluye reglas claras sobre el  
9 manejo compartido de la información resultante del trabajo conjunto y que tienen vigencia para  
10 el presente convenio.  
11

12  
13 Asatrizy, después de tres años de trabajo comunitario, en mayo de 2007 estableció el Plan de  
14 Vida, uno de cuyos capítulos promueve la construcción de un modelo propio de atención de  
15 salud, basado en la defensa y promoción de la cultura y los conocimientos tradicionales, pero  
16 procurando una prudente y respetuosa articulación con el sistema occidental de salud.  
17

18  
19 Para esto Asatrizy ha pedido al Dr. Zuluaga su acompañamiento, de manera que se pueda  
20 trabajar conjuntamente, conscientes de que las comunidades están siendo afectadas por  
21 muchos problemas de salud que no siempre tienen solución con la medicina occidental y que  
22 se han perdido muchas tradiciones y prácticas culturales que antes mantenían la salud. Esto  
23 incluye el desarrollo de un programa de recuperación y promoción de conocimientos  
24 tradicionales y prácticas de autocuidado.  
25

26 En la reunión de Junta Directiva de enero 11 de 2008 recibimos información sobre la propuesta  
27 de investigación que el CEMI propone realizar en nuestras comunidades, en el marco de los  
28 estudios de Maestría en Ciencias Médicas, Vertiente Epidemiología Aplicada, que el Dr.  
29 Zuluaga adelanta con la Universidad Autónoma de Guerrero (México) y el CIET, siendo  
30 aceptada de manera preliminar, por lo que se envió carta al Dr. Neil Andersson manifestando  
31 nuestro acuerdo.  
32

#### 33 34 **4. Meta**

35  
36 Realizar un estudio epidemiológico para un programa de intervención en atención primaria de  
37 salud para la promoción y prevención de las enfermedades relacionadas con el ciclo  
38 reproductivo de las mujeres indígenas en comunidades de Asatrizy, Vaupés.  
39

#### 40 41 **5. Objetivos**

- 42 a. Fortalecer, recuperar y promover los conocimientos tradicionales y la cultura de las  
43 comunidades de Asatrizy.
- 44 b. Adelantar un estudio transversal con la participación de las mujeres pertenecientes a las  
45 siete comunidades de Asatrizy.
- 46 c. Estudiar la prevalencia de problemas de salud relacionados con el ciclo vital de la mujer.
- 47 d. Estudiar la frecuencia de prácticas tradicionales relacionadas con el cuidado de los  
48 ciclos vitales de la mujer.
- 49 e. Determinar las posibles asociaciones entre enfermedades propias de la mujer y la  
50 pérdida de las prácticas tradicionales y culturales de salud.
- 51 f. Divulgar los resultados del estudio a las mujeres participantes, miembros de las  
52 comunidades, líderes, agentes sanitarios y educativos y la Junta Directiva de Asatrizy.
- 53 g. A partir de los resultados, realizar un programa de intervención en autocuidado y  
54 atención primaria en salud para la promoción y prevención de enfermedades  
55 relacionadas con el ciclo vital de la mujer.  
56  
57  
58  
59  
60

- 1
  - 2
  - 3
  - 4
  - 5
  - 6
  - 7
  - 8
  - 9
  - 10
  - 11
  - 12
  - 13
  - 14
  - 15
  - 16
  - 17
  - 18
  - 19
  - 20
  - 21
  - 22
  - 23
  - 24
  - 25
  - 26
  - 27
  - 28
  - 29
  - 30
  - 31
  - 32
  - 33
  - 34
  - 35
  - 36
  - 37
  - 38
  - 39
  - 40
  - 41
  - 42
  - 43
  - 44
  - 45
  - 46
  - 47
  - 48
  - 49
  - 50
  - 51
  - 52
  - 53
  - 54
  - 55
  - 56
  - 57
  - 58
  - 59
  - 60
- h. A partir de los resultados, incluir un proceso de formación específica en salud tradicional en el proceso de educación propia que adelanta Asatrizy.
  - i. Compartir los resultados del estudio con las entidades de carácter municipal, departamental y nacional que tienen responsabilidad en los programas de salud, educación y desarrollo adelantados en las comunidades de Asatrizy, de manera que los programas tengan mayor sensibilidad cultural.

## 6. Principios

- a. El proyecto mejorará la capacidad y habilidades de miembros de la comunidad en investigación basada en la comunidad.
- b. Las comunidades se involucrarán como socios en todos los aspectos de la investigación, desde el diseño hasta la implementación.
- c. Se guardará el anonimato de los encuestados en todas las etapas y su identidad será protegida cuando los datos sean recogidos y los resultados presentados.
- d. Asatrizy retiene la propiedad de los datos y será la primera en recibir los resultados.
- e. Para proteger la identidad de los encuestados, el Gests guardará los datos en nombre de Asatrizy en un lugar seguro.
- f. Todos los datos serán recogidos y guardados según lo establecido en este convenio.
- g. Los datos de este proyecto sólo serán utilizados para alcanzar los objetivos y la meta establecida.

## 7. Responsabilidades

Las partes se comprometen a que el proyecto se desarrolle como sigue:

- a. Asatrizy supervisará el proyecto a través de la Junta Directiva y la Coordinadora de Mujeres.
- b. El Gests trabajará con un individuo identificado por Asatrizy para coordinar la comunicación entre las comunidades participantes.
- c. El Gests vinculará a investigadores de la comunidad seleccionados por Asatrizy para acompañar la investigación, recoger los datos e interpretar los resultados que han de compartir con sus comunidades.
- d. El Gests validará el instrumento de recolección con los investigadores seleccionados por Asatrizy, considerando los aspectos culturales, de traducción de lengua y de sensibilidad de género.
- e. El Gests financiará según necesidad la reunión de mujeres de las siete comunidades para la realización y retroalimentación del proyecto.
- f. Asatrizy acompañará, con por lo menos un representante, la gira para la realización de las encuestas y la recolección de todos los datos.
- g. El Gests presentará los resultados a Asatrizy de manera apropiada y útil, y responderá ante solicitudes adicionales de análisis.
- h. Los hallazgos serán presentados a los participantes de la comunidad y serán invitados a ofrecer retroalimentación/interpretación de los resultados. El Gests también asistirá en la presentación de los hallazgos a nivel comunitario, según solicitud.

## 8. Confidencialidad

Asatrizy y Gests se comprometen a salvaguardar la privacidad y seguridad de toda la información que contenga identificaciones personales y/o comunitarios. Se obtendrá consentimiento informado, culturalmente adecuado, según los requerimientos de la Junta

1 Directiva de Asatrizy, de la Unión de Mayores Kumuá Yoamará, de las mujeres encuestadas,  
2 previo a la recolección de la información personal.  
3

#### 4 9. Posterior divulgación

5  
6 Asatrizy y Gests no divulgarán la información recolectada para ningún otro propósito a menos  
7 que acuerden lo contrario las dos partes y lo autoricen por escrito.  
8

#### 9 10. Modificaciones de éste convenio

10 Las modificaciones a este convenio se harán por escrito y firmadas por las partes.  
11

12  
13 En constancia las partes suscriben el presente convenio, en dos ejemplares del mismo tenor y  
14 valor, a los 18 días del mes de mayo de 2008.  
15

16  
17 Grupo de Estudios en Sistemas Tradicionales de Salud de la facultad de medicina de la  
18 Universidad del Rosario  
19 Centro de Estudios Médicos Interculturales (CEMI)  
20  
21

22   
23 Germán Zuluaga R.  
24 Director General  
25 Investigador Principal  
26  
27

28 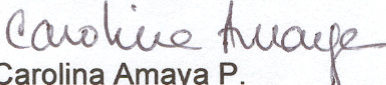  
29 Carolina Amaya P.  
30 Investigadora asociada  
31  
32

33 Asociación de Autoridades Tradicionales Indígenas de la Zona de Yapú, ASATRIZY  
34

35   
36 Efraín R. Mejía A.  
37 Presidente  
38

39   
40 Benjamín Jaramillo G.  
41 Secretario  
42  
43

44 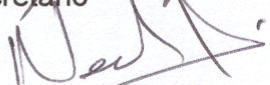  
45 Nelson C. Muñoz L.  
46 Coord. Plan de vida  
47  
48

49 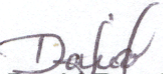  
50 David Ramírez  
51 Suplente fiscal  
52  
53  
54  
55  
56  
57  
58  
59  
60

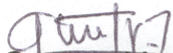  
Gustavo Vargas B.  
Vicepresidente

  
Ramiro Ardila  
Fiscal

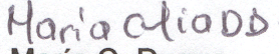  
María C. Duque  
Coord. Mujeres



**INITIATION RITES AT MENARCHE AND SELF REPORTED  
DYSMENORRHEA AMONG INDIGENOUS WOMEN OF THE  
COLOMBIAN AMAZON: A CROSS-SECTIONAL STUDY**

|                                 |                                                                                                                                                                                                 |
|---------------------------------|-------------------------------------------------------------------------------------------------------------------------------------------------------------------------------------------------|
| Journal:                        | <i>BMJ Open</i>                                                                                                                                                                                 |
| Manuscript ID:                  | bmjopen-2012-002012.R2                                                                                                                                                                          |
| Article Type:                   | Research                                                                                                                                                                                        |
| Date Submitted by the Author:   | 14-Dec-2012                                                                                                                                                                                     |
| Complete List of Authors:       | Zuluaga, German; Universidad del Rosario, Escuela de Medicina; Cemi, General Direction<br>Andersson, Neil; Universidad Autónoma de Guerrero, Centro de Investigación de Enfermedades Tropicales |
| <b>Primary Subject Heading</b>: | Epidemiology                                                                                                                                                                                    |
| Secondary Subject Heading:      | Public health, Sexual health, Obstetrics and gynaecology                                                                                                                                        |
| Keywords:                       | Intercultural , Dysmenorrhoea, Medicine tradicional, Initiation rites                                                                                                                           |
|                                 |                                                                                                                                                                                                 |

SCHOLARONE™  
Manuscripts

1  
2  
3  
4  
5 **INITIATION RITES AT MENARCHE AND SELF REPORTED DYSMENORRHEA AMONG**  
6 **INDIGENOUS WOMEN OF THE COLOMBIAN AMAZON: A CROSS-SECTIONAL STUDY**  
7  
8  
9

10 Germán Zuluaga, calle 12 no. 3A-21 (Cota – Colombia, SA), gzuluaga@cemi.org.co, 57  
11 3132625103 and 57 1 8777040.  
12  
13

14  
15  
16 Neil Andersson, Centro de Investigación de Enfermedades Tropicales (CIET), Universidad  
17 Autónoma de Guerrero, Calle Pino, El Roble, Acapulco México, andersson@ciet.org, 52 744  
18 488 0012 and 52 744 487 7230.  
19  
20

21 Germán Zuluaga, Escuela de Medicina y Ciencias de la Salud, Universidad del Rosario,  
22 Bogotá, Colombia.  
23  
24

25  
26  
27 Neil Andersson, Universidad Autónoma de Guerrero, Centro de Investigación de  
28 Enfermedades Tropicales, Acapulco, México.  
29  
30

31  
32 Keywords:

33 Intercultural

34  
35 Dysmenorrhoea

36  
37 Medicine, Traditional

38  
39 Initiation rites  
40  
41  
42

43  
44 Word count: 2373  
45  
46  
47  
48  
49  
50  
51  
52  
53  
54  
55  
56  
57  
58  
59  
60

## ABSTRACT

**Objectives:** Investigate the association between self reported dysmenorrhoea and patterns of female initiation rites at menarche among Amazonian indigenous peoples of Vaupés in Colombia..

**Design:** Cross-sectional study of all women in seven indigenous communities. Questionnaire administered in local language documented female initiation rites and experience of dysmenorrhoea. Analysis examined ten initiation components separately, then together, comparing women who underwent all rites, some rites and no rites.

**Settings:** Seven indigenous communities belonging to the Tukano language group in the Great Eastern Reservation of Vaupés (Colombia) in 2008.

**Participants:** All women over the age of 13 years living in the seven communities in Vaupés, who had experienced at least two menstruations (n=185), aged 13 to 88 years (mean 32,5; SD 15,6).

**Primary and secondary outcome measures:** The analysis rested on pelvic pain to define dysmenorrhoea as main outcome. Women were also asked about other disorders present during menstruation or the precedent days, and about the interval between menstruation and its duration.

**Results:** Only 17.3% (32/185) completed all initiation rites and 52.4% (97/185) reported dysmenorrhoea. Women not completing the rites were more likely to report dysmenorrhoea than those who did so (p=0.01 Fisher exact), taking into account age, education, community, parity, and use of family planning. Women who completed less than the full complement of rites had higher risk than those who completed all rites. Those who did not complete all rites reported increased severity of dysmenorrhoea (p=0.00014).

**Conclusions:** Our results are compatible with an association between traditional practices and women's health. We could exclude indirect associations with age, education, parity and use of family planning as explanations for the association. The study indicates feasibility, possible utility and limits of inter-cultural epidemiology in small groups.



## Article summary

### Article focus

- Female initiation rites and dysmenorrhoea.
- Epidemiology and cultural safety.

### Key messages

- There is an association between what women say about abandoning initiation rites and dysmenorrhoea.
- The study suggests an association between traditional practices and women's health.
- The study proposes the feasibility and usefulness of intercultural epidemiology.

### Strengths and limitations of this study

- There are no epidemiological studies of indigenous initiation and dysmenorrhoea.
- The small numbers problem is recognized, even with all eligible women participating.

**INTRODUCTION**The Tatuyo, Bará, Carapana, Tuyuca y Tukano ethnicities in Tukano language group live between the Papurí and Yapú rivers in the Great Eastern Reservation of Vaupés.[1,2] In collective reservations, the seven communities with very similar customs in a subsistence economy. They share traditional rituals around childbirth, management of the umbilicus, rites of sexual début, marriage, pregnancy, menopause and death but, like many traditional cultures, they have abandoned much of this with urbanisation and globalisation of culture.[3]

According to traditional wisdom, young women will be healthy if they complete initiation rites and follow traditional practices during menstruation. Young women in the region go to residential schools outside their communities. The school year follows a national standard, making it difficult for schoolgirls to participate in traditional rites.[4] This loss of culture is a concern for Amazon indigenous communities, where every year people have less to do with traditional medical practices.[5] This research began with the express concern of community elders who, in the course of a decade long partnership with the traditional health systems group at Universidad del Rosario in Colombia, asked if loss of their cultural practices could affect women's reproductive health, particularly dysmenorrhoea.

Qualitative research methods, like unstructured conversations, are relatively easily adapted to address cultural issues like this. Cultural adaptation is less common in epidemiology,

1  
2  
3  
4  
5 which is often perceived as unreceptive to alternative epistemologies.[6] Yet intercultural  
6 epidemiology can be useful to identify potential health benefits of traditional health practices,  
7 many of which are being lost as globalization erodes indigenous cultures.  
8

9  
10 Problems related to women's reproductive cycle are increasing worldwide.[7-9] Western  
11 medicine has few satisfactory solutions to offer women with dysmenorrhoea, offering an  
12 interesting case in point as the World Health Organization calls to explore possible  
13 contributions of traditional medicine.[10,11] A sparse epidemiological literature addresses the  
14 links with dysmenorrhoea and cultural influences,[12, 13] ethnicity and religiosity.[14, 15]  
15 Better documented risk factors are diet, exercise, psychological or emotional episodes, and  
16 use of alcohol and tobacco.[16-20] We found no epidemiological studies of indigenous  
17 initiation rites and dysmenorrhoea. A retrospective survey using a questionnaire evaluated  
18 this possible association.  
19  
20  
21  
22  
23

## 24 METHODS

25  
26 **Study population:** All women over the age of 13 years living in the seven communities in  
27 Vaupés, who had experienced at least two menstruations (n=185), aged 13 to 88 years  
28 (mean 32,5; SD 15,6).  
29  
30

31 **Outcome:** Interviewers asked if, during menstruation, women suffered pelvic pain, dizziness,  
32 headache, bodily pains, and problems in the days prior to menstruation. They also asked  
33 about the interval between menstruation and duration of menstruation. The analysis rested  
34 on pelvic pain to define dysmenorrhoea.[21-23] The interviewer asked directly about pain and  
35 its severity, without asking about duration of pain, proportion of menstruations affected or  
36 activities that could not be completed due to the pain. Because pain perception is subjective,  
37 we used a well-established graphic approach showing faces with different grades of  
38 discomfort (Figure 1).[24] Respondents simply pointed to the face that reflected their  
39 experience during menstruation.  
40  
41  
42  
43  
44

45 **Exposure:** Traditional healers described initiation rites at the onset of menarche, lasting  
46 three to five days, during which time the young women completed a number of discrete  
47 activities: each initiate had a god-mother (*madrina*); each had a mentor during the initiation;  
48 the initiate spent 3-5 days away from others; she received a diet limited to specific foods; she  
49 received a blessing or prayer from the traditional healer; she applied powdered *carayurú*, a  
50 vegetable stain (*Arrhabidea chica*); her hair was cut; her body was painted with *we*, another  
51 vegetable stain (*Bignoniaceae sp.*); she inhaled *ají*, a hot spice mix (*Capsicum spp.*); and  
52  
53  
54  
55  
56  
57  
58  
59  
60

1  
2  
3  
4  
5 water or a plant precipitated emesis. The questionnaire documented exposure to each  
6 component rite (yes/no) separately. Without understanding the exact workings of the initiation  
7 rites, we followed the WHO guideline to handle the component activities as a “black box”[25]:  
8 we do not always have to understand exactly how a traditional therapy works to measure its  
9 effect. We thus documented each of the individual rites.  
10  
11

12  
13 **Instrument:** A month of consultation with local healers (*payés*) clarified the main research  
14 question and a list of culturally appropriate questions. After approval of the questionnaire for  
15 semantic and cultural equivalence with the *payés*, the researchers piloted the questionnaire  
16 and pain images with 14 women of the same ethnic group living in Mitu (not part of the  
17 study), their pain report was assessed using the graphic approach showing faces with  
18 different grades of discomfort. The authorities in each community invited all women – by  
19 cultural definition, the first menstruation identifies the woman as an adult -- to the communal  
20 hall (*maloka*) where the researchers explained the instrument, issues of confidentiality and  
21 the right to decline to participate or to leave out any question. No eligible woman declined to  
22 participate. Interviewers administered a 37-question instrument through a translator during  
23 December 2008.  
24  
25  
26  
27  
28  
29

30  
31 **Analysis:** Epi-data 3.1 served for manual data capture analysis relied on CIETmap 2.0 beta  
32 8 (Centro de Investigación de Enfermedades Tropicales, Mexico), public domain software  
33 that provides a Windows-like interface with R. Bivariate analysis with each of the 10  
34 component activities examined the relationship of each component rite on its own with  
35 dysmenorrhoea. We also analysed complete and incomplete initiation using sequential  
36 stratification by age of the woman, community of origin (some had more access to Western  
37 ways), education, parity, family planning and menopause. We analysed trend using the  
38 Mantel extension of the Mantel-Haenszel test.[26] We report results as adjusted odds ratios  
39 (aOR) with 95% confidence intervals. The two-tailed Fisher exact test served for estimation  
40 of confidence with the resulting sparse numbers comparisons.  
41  
42  
43  
44  
45

46 Without any prior basis for weighting importance of different activities in the initiation, we  
47 calculated the average effect across the ten components as though each was a separate  
48 exposure; this relied on Meta, an R program. A Forest plot summarises this (Figure 2).  
49 Compared with occurrence among women who completed all ten rites of initiation, a  
50 sensitivity analysis dropped each initiation rite in turn to test relevance of each in initiation.  
51  
52  
53

54 **Control of biases:** Involvement of healers and elders in the design guaranteed cultural fit.  
55 The questionnaire inquired for current family planning, and if so, which is the method used  
56  
57  
58  
59  
60

(plants, pill, injection, condom, pessary, surgery, partner-managed contraception), and duration of use of each method, as this could affect dysmenorrhoea; hormonal pills can diminish pain and IUDs can increase pain. Use of Western contraceptive methods also coincides with Western acculturation. We stratified by contraceptive use to separate between the effect of the contraceptive and the initiation rites. To avoid an acculturation bias from interviewing only women who did not go to nearby towns for work, we conducted the study in December when most return to their homes. We took age, menopause and education into account by stratification to limit the differential influence of these on responses.

**Ethical aspects:** The CIET ethical review committee at the Universidad Autónoma de Guerrero and Research Fund at the Universidad del Rosario in Colombia both approved the proposal. The leadership of each community signed formal agreements for data management and sharing with all participants present, after the researchers had explained to all the nature of the study, how data would be used, confidentiality, and rights to decline participation.[27]

## RESULTS

A total of 185 women participated, representing 70.6% of the 262 women over the age of 12 years identified in the 2006 census. The 77 women excluded had either migrated from the area or they had not completed two menstruations. Of 158 women who knew their age in years, the average was 32.5 years (mode 19 years, SD 15.6). Respondents reported low levels of education, 28.3% (52/184) with no schooling and only 17.4% (32/184 women interviewed) with secondary education. Few used family planning (11.1% based on 15/135 women of reproductive age) with an average of 4.9 children each (SD 2.7).

Table 1: Characteristics of the women included in the sample

| Variable               | Yes |       | No  |        | Total |
|------------------------|-----|-------|-----|--------|-------|
| Mixed ethnicity        | 0   | 0.0%  | 185 | 100.0% | 185   |
| Born in this community | 94  | 51.4% | 89  | 48.6%  | 183   |
| Knew her age           | 158 | 85.4% | 27  | 14.6%  | 185   |
| Menopausal             | 50  | 27.0% | 135 | 73.0%  | 185   |
| Had had children       | 139 | 75.1% | 46  | 24.9%  | 185   |

|                                        |     |       |     |       |     |
|----------------------------------------|-----|-------|-----|-------|-----|
| Using contraceptive methods            | 15  | 11.1% | 120 | 88.9% | 135 |
| Using contraceptive pills              | 0   | 0.0%  | -   | -     | -   |
| Using IUDs                             | 2   | 13.3% | -   | -     | -   |
| Using plants                           | 1   | 6.7%  | -   | -     | -   |
| Tubal ligation                         | 4   | 26.7% | -   | -     | -   |
| Using other methods                    | 8   | 53.3% | -   | -     | -   |
| Any education level                    | 133 | 71.9% | 52  | 28.1% | 185 |
| Lives in a community wit airplane road | 118 | 65.2% | 63  | 34.8% | 181 |
| Reported dysmenorrhea                  | 97  | 52.4% | 88  | 47.6% | 185 |
| Rites completion                       |     |       |     |       |     |
| All rites completed                    | 32  | 17.3% | 153 | 82.7% | 185 |
| No rites at all                        | 14  | 7.6%  | 171 | 92.4% | 185 |
| Incomplete rite                        | 139 | 75.1% | 46  | 24.9% | 185 |

The average age of menarche was 13.8 years (SD 1.16). Some 52% (97/185) reported dysmenorrhoea and 88.6% (164/185) reported undergoing at least some rite of initiation during menarche. Table 2 shows the proportion involved in each of ten activities identified by traditional healers as the initiation rites. Considering each rite separately, only emesis retained a significant association on its own with dysmenorrhea, after taking into account age of the woman, community of origin (some had more access to Western ways), parity, family planning by sequential stratification and adjusting for menopause and education. The Forest plot (Figure 2) shows dysmenorrhoea associated with each component rite compared with women who did no rites. The average effect size was OR 1.66 (95%CI 1.35-2.04).

Table 2: Exposure to different aspects of initiation rite and risk of dysmenorrhoea (odds ratio)

| Initiation rite | % of all women receiving this rite** | Risk of dysmenorrhoea in each subgroup |                    |       |             |
|-----------------|--------------------------------------|----------------------------------------|--------------------|-------|-------------|
|                 |                                      | Receiving rite                         | Not receiving rite | aOR*  | 95% CI      |
| Emesis          | 38.4%                                | 27/71                                  | 70/114             | 0.39* | 0.21   0.70 |

|                                |       |        |       |      |      |      |
|--------------------------------|-------|--------|-------|------|------|------|
| Cared for during the ceremony  | 76.8% | 69/142 | 28/43 | 0.51 | 0.25 | 1.02 |
| Applied <i>carayurú</i> powder | 84.3% | 78/156 | 19/29 | 0.53 | 0.23 | 1.19 |
| Spent time in isolation        | 71.9% | 64/133 | 33/52 | 0.53 | 0.28 | 1.03 |
| Followed prescribed diet       | 71.9% | 64/133 | 33/52 | 0.53 | 0.28 | 1.03 |
| Body painted with <i>we</i>    | 50.8% | 44/94  | 53/91 | 0.63 | 0.35 | 1.12 |
| Had a godmother                | 50.8% | 45/94  | 50/88 | 0.70 | 0.39 | 1.25 |
| Cut hair                       | 68.6% | 64/127 | 33/58 | 0.77 | 0.41 | 1.45 |
| Inhaled <i>aji</i>             | 49.2% | 45/91  | 52/94 | 0.79 | 0.44 | 1.41 |
| Blessed by traditional healer  | 88.6% | 85/164 | 12/21 | 0.81 | 0.32 | 2.04 |

\* Adjusted for age and level of education in a stratified analysis..

\*\* Total 185 women; no missing data

To understand the role of each rite in relation to dysmenorrhoea, a sensitivity analysis compared dysmenorrhoea rates among women who did all ten rites (n=32) with women who participated in less than the ten, dropping each rite in turn. Figure 3 shows the unadjusted odds of dysmenorrhoea for all rites compared with failing to do specific rites, and those who did no rites. Those who completed the 10 rites (8/32) contrasted sharply with those who completed some or no rites (89/153) (p-Fisher 0.001).

Table 3: Sensitivity analysis of initiation rites and dysmenorrhoea contrasting women who completed all rites and those who completed only one component rite.

|                                | n   | Frequencies |      |     |      |         | Risk of dysmenorrhoea |            |          |
|--------------------------------|-----|-------------|------|-----|------|---------|-----------------------|------------|----------|
|                                |     | No          |      | Yes |      | p-value | OR                    | 95% CI     | p-Fisher |
| None                           | 46  | 14          | 30,4 | 32  | 69,6 | 0.001   | 7,5                   | 1,95-28,7  | 0.001    |
| Emesis                         | 71  | 39          | 54,9 | 32  | 45,1 | 0.001   | 2,85                  | 1,04-7,82  | 0.050    |
| Cared for during the ceremony  | 142 | 110         | 77,5 | 32  | 22,5 | 0.001   | 3,73                  | 1,59-8,78  | 0.001    |
| Followed prescribed diet       | 133 | 101         | 75,9 | 32  | 24,1 | 0.001   | 3,73                  | 1,58-8,85  | 0.001    |
| Spent time in isolation        | 133 | 101         | 75,9 | 32  | 24,1 | 0.001   | 3,73                  | 1,58-8,85  | 0.001    |
| Applied <i>carayurú</i> powder | 156 | 124         | 79,5 | 32  | 20,5 | 0.001   | 3,89                  | 1,68-9,02  | 0.001    |
| Blessed by traditional healer  | 164 | 132         | 80,5 | 32  | 19,5 | 0.001   | 4,20                  | 1,83-9,66  | 0.001    |
| Body painted with <i>we</i>    | 94  | 62          | 66,0 | 32  | 34,0 | 0.001   | 4,15                  | 1,65-10,4  | 0.001    |
| Cut hair                       | 127 | 95          | 74,8 | 32  | 25,8 | 0.001   | 4,31                  | 1,81-10,2  | 0.001    |
| Had a godmother                | 94  | 62          | 66,0 | 32  | 34,0 | 0.001   | 4,44                  | 1,77-11,1  | 0.001    |
| Inhaled <i>aji</i>             | 91  | 59          | 64,8 | 32  | 35,2 | 0.001   | 5,05                  | 1,99-12,77 | 0.001    |

Most respondents with dysmenorrhoea (92/97) reported severity using the Wong-Baker

Faces Pain Rating Scale. Table 4 shows a statistically significant increase across five levels of severity for those who completed all rites compared with those who did any or no rites ( $p=0.0014$ ). It also contrasts those who did no rites with those who completed all rites ( $p=0.0039$ ).

Table 4: Completion of initiation rites and reported intensity of dysmenorrhoea

|                               | No dysmenorrhoea | Intensity of dysmenorrhoea                                              |              |              |              |
|-------------------------------|------------------|-------------------------------------------------------------------------|--------------|--------------|--------------|
|                               | 0                | 1                                                                       | 2            | 3            | 4 y 5        |
| <b>Incomplete or no rites</b> | 64               | 18                                                                      | 20           | 19           | 27           |
| <b>All rites completed</b>    | 24               | 2                                                                       | 4            | 1            | 1            |
| <b>Total</b>                  | 88               | 20                                                                      | 24           | 20           | 28           |
| <b>OR</b>                     |                  | 3.94                                                                    | 3.49         | 6.76         | 6.92         |
| <b>95%CI</b>                  |                  | 1.72 - 9.00                                                             | 1.41 - 8.64  | 1.84 - 24.93 | 1.17 - 40.88 |
|                               |                  | Mantel-Haenszel chi square for linear trend = 10.16<br>p-value = 0.0014 |              |              |              |
| <b>No rites at all</b>        | 4                | 1                                                                       | 3            | 3            | 2            |
| <b>All rites completed</b>    | 24               | 2                                                                       | 4            | 1            | 1            |
| <b>Total</b>                  | 28               | 3                                                                       | 7            | 4            | 3            |
| <b>OR</b>                     |                  | 6.75                                                                    | 6.93         | 9.38         | 5.64         |
| <b>IC 95%</b>                 |                  | 1.72 - 26.42                                                            | 1.77 - 27.17 | 1.82 - 48.41 | 0.57 - 55.87 |
| <b>P-Fisher</b>               |                  | 0.01                                                                    | 0.01         | 0.02         | 0.2          |
|                               |                  | Mantel-Haenszel chi square for linear trend = 8.33; p-value = 0.0039    |              |              |              |

## DISCUSSION

Our results support the idea that abandoning traditional initiation rites, or adopting practices that go along with abandoning these rites, is a risk factor for dysmenorrhoea. Emesis was the single strongest protective rite on its own, but sensitivity analysis showed a consistent effect

1  
2  
3  
4  
5 of the other rites for those who did not abandon the initiation practices. The apparent lack of  
6 specific effects of each component rite supports the idea that synergy between all  
7 components completes the protective effect.  
8

9  
10 The average age of menarche of our sample was higher than typically reported in the  
11 literature,[28-33] possibly indicating a relatively low level of secular change.[34,35] That one  
12 half of the women reported dysmenorrhoea (97/185) is lower than reported in international  
13 studies.[36-40] Although the local definition (facial expressions) was useful for internal  
14 comparisons, it is of limited value in international comparisons.  
15  
16

17  
18 This study faced several common challenges in inter-cultural epidemiology. Even with all  
19 eligible women participating, the small numbers problem is well recognised and has no easy  
20 solution.[41,42] As anticipated, we found it difficult to untangle issues like use of  
21 contraceptives and reporting of age, given the effect of acculturation on these. Despite this  
22 interdependence of exposures, we believe we were able to show an independent effect of  
23 initiation rites.  
24  
25  
26

27  
28 Cultural issues probably reduced the effectiveness of the study and reduced the numbers  
29 further. The 14.6% (27/185) of women who could not give their age in calendar years is  
30 testimony to their distance from Western culture. Analysing only those who mention an age  
31 included a cultural filter, limiting our conclusions to those with some measure of Western  
32 acculturation. Recall bias might have affected the results as some women had to remember  
33 rites that took place decades earlier; a social desirability bias (not wanting to be culturally  
34 different, wanting to avoid disapproval) might also have influenced the results. We have no  
35 additional information to clarify the directions of these biases.  
36  
37  
38  
39

40  
41 Within these constraints and the stringent limits imposed by our population size, we tried to  
42 take account of other acculturation issues, beyond initiation rites, by stratifying for education,  
43 age, parity, community of residence (some had greater access to modern towns) and use of  
44 family planning. The lower risk associated with initiation rites might still be due to  
45 unmeasured lifestyle issues associated with maintaining initiation rites. Solving this issue  
46 may require a randomised controlled trial where the differential support for the fulfilment of  
47 the rite among communities be contrasted with the occurrence of dysmenorrhoea.  
48  
49  
50

51  
52 Since the 1950s, public health programmes have contemplated primary, secondary and  
53 tertiary prevention. More recently, *primordial prevention* identified social, economic and  
54 cultural patterns that affect risks.[43] Within its limitations, our study is compatible with the  
55  
56  
57  
58  
59  
60



1  
2  
3  
4  
5 idea that primary or primordial prevention of dysmenorrhoea might be possible for indigenous  
6 women who are increasingly in contact with Western ways.  
7

## 8 **CONCLUSIONS**

9  
10 Without adding insight into exact mechanisms, this cross-sectional study shows an  
11 association between abandoning initiation rites and dysmenorrhoea. No one of the rites on  
12 its own explains this association.  
13  
14

15 Inter-cultural approaches have received little attention in the epidemiological literature, and  
16 these need further investment. In this study, the indigenous leaders of the seven  
17 communities requested the study and set the research question; they specified the cultural  
18 exposures of interest; they participated in the design and testing of instruments; they led  
19 interpretation of results; and they are the primary research users, sharing the results with  
20 their communities in support of traditional health practices.  
21  
22

23 Without underestimating the remaining intercultural challenges, the difficulties of research in  
24 small populations and the limits of observational studies, we feel this study achieves a first  
25 step in culturally safe descriptive epidemiology of traditional medicine: a longer term dialogue  
26 led to the research question and design; the indigenous leaders defined the exposure of  
27 interest; the ethical review process fitted with indigenous ethical concepts; it generated  
28 evidence suggesting an effective traditional practice, without understanding how this works.  
29  
30  
31  
32  
33  
34  
35  
36  
37  
38  
39  
40  
41  
42  
43  
44  
45  
46  
47  
48  
49  
50  
51  
52  
53  
54  
55  
56  
57  
58  
59  
60

## ACKNOWLEDGMENTS

Field work was financed by The Research Fund of Universidad del Rosario. Benedicto Mejía and Efraín Mejía, along with other *payés* (wise men, healers) from the seven communities participated in formulation of research questions, design, application of the instrument and interpretation of results. Alicia Jaramillo and Guillermina Ferrer translated the questions during the application of the instrument. Carolina Amaya and Natalia Reinoso carried out the pilot study and the research instrument application in the seven communities. Iván Sarmiento helped with data analysis, tables and figures elaboration and revision of citations and bibliographic references. Andrés Cañón and Sebastián Luna collaborated with the systematic review of cultural risk factors for dysmenorrhea.

## COMPETING INTERESTS

We, the authors, declare that there are no conflicts of interest in this study regarding the Indigenous communities that took part, the recognised rights of the Indigenous Peoples, or the financing institutions.

## FUNDING

Fieldwork was financed by The Research Fund of Universidad del Rosario. Germán Zuluaga, MD, MSc carried out the research project as part fulfilment of the requirements of MSc (Epidemiology) at the Universidad Autónoma de Guerrero.

## FIGURE LEGENDS

Figure 1: Wong-Baker Faces Pain Rating Scale

Figure 2: Forest plot of individual initiation rites and risk of dysmenorrhoea

Figure 3: Sensitivity analysis compared dysmenorrhoea risk among women who did all ten rites (n=32) compared with women who did not do at least one rite, and those who did no rite (listing shows excluded rites)

## REFERENCE LIST

---

1. Dirección de Etnias del Ministerio del Interior y de Justicia. *Resolución no. 0006 de 26 de enero de 2005, por medio de la cual se inscribe en el registro de asociaciones de autoridades tradicionales y/o cabildos la constitución de la asociación de autoridades tradicionales indígenas de la zona de Yapú - ASATRIZY*. Bogotá (CO): Min. Int. Just, 2005.
2. Sarmiento I, Amaya C. *Plan de vida: unidos con un solo pensamiento para vivir bien*. Asociación de Autoridades Tradicionales Indígenas de la Zona de Yapú. Bogota, Colombia 2008.
3. Sarmiento I, Amaya C. Asociación de Autoridades Tradicionales Indígenas de la Zona de Yapú. *Historia y origen del proceso de un Nuevo despertar*. Bogotá, Colombia, 2008.
4. Rembeck GI, Gunnarsson RK. Improving pre- and postmenarcheal 12-year-old girls' attitudes toward menstruation. *Health Care Women Int*. 2004;**25**:680-98.
5. Piñeros-Petersen M, Ruiz-Salguero M. Aspectos demográficos en comunidades indígenas de tres regiones de Colombia. *Salud Pública Mex* 1998;**40**:324-329.
6. Cameron M, Andersson N, and Ledogar RJ. Culturally safe epidemiology: oxymoron or scientific imperative. *Pimatisiwin: Journal of Aboriginal and Indigenous Community Health* 2010;**8**(2):89-116.
7. World Health Organization. *Engaging for Health. □ 11th General Program of Work 2006-2015, a Global Health Agenda*. Geneva (CH): WHO, 2006. (Working paper GPW/2006-2015). Available at: [http://whqlibdoc.who.int/publications/2006/GPW\\_eng.pdf](http://whqlibdoc.who.int/publications/2006/GPW_eng.pdf). Accessed October 15, 2008.
8. Rodríguez J. *Descripción de la mortalidad por departamentos: Colombia año 2000*. Bogotá (CO): Pontificia Universidad Javeriana, Cendex. (Working Paper ASS /DT 016-05). Available at: <http://www.cendex.org.co/pdf/DT016-05.pdf>. Accessed January 15, 2008.
9. García-Pérez H, Harlow SD, Erdmann CA, Denman C. Pelvic pain and associated characteristics among women in northern Mexico. *Int Perspect Sex Reprod Health*. 2010;**36**:90-8.

10. World Health Organization. *Traditional Medicine and Health Coverage*. Geneva: WHO, 1983.
11. World Health Organization. *WHO Traditional Medicine Strategy: 2002-2005*. Geneva, (CH): WHO, 2002.
12. Garg S, Sharma N, Sahay R. Socio-cultural aspects of menstruation in an urban slum in Delhi, India. *Reprod Health Matters* 2001;**9**:16-25.
13. Avasarala AK, Panchangam S. Dysmenorrhoea in different settings: are the rural and urban adolescent girls perceiving and managing the dysmenorrhoea problem differently? *Indian J Community Med* 2008;**33**:246-249.
14. Goldstein-Ferber S, Granot M. The association between somatization and perceived ability: roles in dysmenorrhea among israeli arab adolescents. *Psychosom Med* 2006;**68**:136-142.
15. Marván ML, Vacio A, García-Yañez G, *et al*. Attitudes toward menarche among Mexican pre-adolescents. *Women Health* 2007;**46**:7-23.
16. Latthe P, Mignini L, Gray R, *et al*. Factors predisposing women to chronic pelvic pain: systematic review. *BMJ* 2006;**332**:749-755.
17. Patel A, Tanksale V, Sahasrabhojane M, *et al*. The burden and determinants of dysmenorrhoea: a population-based survey of 2262 women in Goa, India. *BJOG* 2006;**113**:453-463.
18. Balbi C, Musone R, Menditto A, *et al*. Influence of menstrual factors and dietary habits on menstrual pain in adolescence age. *Eur J Obstet Gynecol Reprod Biol* 2000;**91**:143-148.
19. Proctor ML, Murphy PA. Herbal and dietary therapies for primary and secondary dysmenorrhoea. *Cochrane Database Syst Rev* 2001;**(3)**:CD002124.
20. Parazzini F, Tozzi L, Mezzopane R, *et al*. Cigarette smoking, alcohol consumption, and risk of primary dysmenorrhea. *Epidemiology* 1994;**5**:469-472.
21. Mazza D. *Women's Health in General Practice*. Oxford: Butterworth Heinemann, 2004.
22. Deb Sh, Raine-Fenning N. Dysmenorrhoea. *Obstetrics, Gynaecology and Reproductive Medicine* 2008;**18**:294-299.

- 1  
2  
3  
4  
5 23. Dawood MY. Primary dysmenorrhoea: advances in pathogenesis and management.  
6 *Obstet Gynecol* 2006;**108**:428-441.  
7
- 8  
9 24. Wong D, Whaley L. *Clinical handbook of pediatric nursing*. 2nd ed. Saint Louis (MO):  
10 Mosby Company, 1986. Quoted by: National Institutes of Health, NIH Pain Consortium. Pain  
11 intensity scales – Wong-Baker faces pain rating scale [NIH Pain Consortium Web site]. July  
12 17, 2007. [http://painconsortium.nih.gov/pain\\_scales/Wong-Baker\\_Faces.pdf](http://painconsortium.nih.gov/pain_scales/Wong-Baker_Faces.pdf) (accessed 24  
13 April 2012).  
14  
15
- 16  
17 25. World Health Organization. *General Guidelines for Methodologies on Research and*  
18 *Evaluation of Traditional Medicine*. Geneva (CH): WHO, 2000. (Working paper  
19 WHO/EDM/TRM/2000.1)  
20  
21
- 22 26. Leuraud K, Benichou J: Tests for monotonic trend from case control data: Cochran-  
23 Armitage-Mantel trend test, isotonic regression and single and multiple contrast tests.  
24 *Biometrical Journal* 2004;**46**:731-749  
25  
26
- 27 27. Grupo de Estudios en Sistemas Tradicionales de Salud. Principios éticos para estudios  
28 médicos aplicados a los sistemas tradicionales de salud 2008.  
29 [http://www.cemi.org.co/images/PRINCIPIOS\\_ETICOS\\_GESTS\\_CEMI.pdf](http://www.cemi.org.co/images/PRINCIPIOS_ETICOS_GESTS_CEMI.pdf) (accessed 14 Jun  
30 2010).  
31  
32
- 33  
34 28. Vera Y, Hidalgo G, Gollo O, *et al*. Edad de la menarquia y su relación con el estrato social  
35 en cinco estados venezolanos. *Acta Cient Estud* 2009;**7**:130-135.  
36  
37
- 38 29. Ulate G. Edad de la menarquia en el Valle Central de Costa Rica y factores asociados a  
39 su aparición. *Rev Costarric Cienc Med* 1995;**16**:37-41.  
40  
41
- 42 30. Fonseca J, Aguilar O. Edad de la Menarquia en San Pedro Sula. *Rev Med Hondur*  
43 1991;**59**: 4-7.  
44  
45
- 46 31. Hernández I, Unanue N, Gaete X, *et al*. Edad de la menarquia y su relación con el nivel  
47 socioeconómico e índice de masa corporal. *Rev Med Chil* 2007;**135**:1429-1436.  
48  
49
- 50 32. Sharma N, Vaid S, Manhas A. Age at menarche in two caste groups (brahmins and  
51 rajputs) from rural areas of Jammu. *Anthropologist* 2006;**8**:55-7.  
52  
53
- 54 33. Romans SE, Martin JM, Gendall K, *et al*. Age of menarche: the role of some psychosocial  
55 factors. *Psychol Med* 2003;**33**:933–939.  
56  
57  
58  
59  
60

- 1  
2  
3  
4  
5 34. Padez C. Social background and age at menarche in portuguese university students: a  
6 note on the secular changes in Portugal. *Am J Hum Biol* 2003;**15**:415-427.  
7  
8  
9 35. Tanner JM. *Growth at Adolescence*. 2nd ed. Oxford: Blackwell, 1962. Quoted by: Korah  
10 L. Knowledge and perceptions regarding menstruation among adolescent girls: a research  
11 study. *Nurs J India* 1991;**82**:205-209.  
12  
13 36. Woods NF, Most A, Dery GK. Prevalence of perimenstrual symptoms. *Am J Public Health*  
14 1982;**72**:1257-1264.  
15  
16  
17 37. Klein JR, Litt IF. Epidemiology of adolescent dysmenorrhea. *Pediatrics* 1981;**68**:661-664.  
18  
19  
20 38. Wilson CA, Key WRJ. A survey of adolescent dysmenorrhea and premenstrual  
21 symptom frequency, a model program for prevention, detection, and treatment. *J Adolesc*  
22 *Health Care*. 1989;**10**:317-322.  
23  
24  
25 39. Jamieson D, Steege J. Prevalence of dysmenorrhoea, dyspareunia, pelvic pain and  
26 irritable bowle syndrome in primary care practices. *Obstet Gynecol* 1996;**87**:55-58.  
27  
28  
29 40. Latthe P, Latthe M, Say L, *et al*. WHO systematic review of prevalence of chronic pelvic  
30 pain: a neglected reproductive health morbidity. *BMC Public Health* 2006;**6**:177.  
31  
32  
33 41. Andresen EM, Diehr PH, Luke DA. Public health surveillance of low-frequency  
34 populations. *Annu Rev Public Health* 2004;**25**:25-52.  
35  
36  
37 42. Monasta L, Andersson N, Ledogar RJ, *et al*. Minority health and small numbers  
38 epidemiology: a case study of living conditions and health of children in five foreign Roma  
39 camps in Italy. *Am J Public Health* 2008;**98**:2035-2041.  
40  
41  
42 43. Bonita R, Beaglehole R, Kjellström T, Basic Epidemiology, Second Edition World Health  
43 Organization, Geneva 2006 p103  
44  
45  
46  
47  
48  
49  
50  
51  
52  
53  
54  
55  
56  
57  
58  
59  
60

1  
2  
3  
4  
5  
6  
7  
8 **INITIATION RITES AT MENARCHE AND SELF REPORTED DYSMENORRHEA**  
9 **~~DYSMENORRHOEA AND INITIATION RITES~~ AMONG INDIGENOUS WOMEN OF THE**  
10 **COLOMBIAN AMAZON: A CROSS-SECTIONAL STUDY**  
11  
12  
13

14 Germán Zuluaga, calle 12 no. 3A-21 (Cota – Colombia, SA), gzuluaga@cemi.org.co, 57  
15 3132625103 and 57 1 8777040.  
16

17  
18  
19 Neil Andersson, Centro de Investigación de Enfermedades Tropicales (CIET), Universidad  
20 Autónoma de Guerrero, Calle Pino, El Roble, Acapulco México, andersson@ciet.org, 52 744  
21 488 0012 and 52 744 487 7230.  
22

23 Germán Zuluaga, Escuela de Medicina y Ciencias de la Salud, Universidad del Rosario,  
24 Bogotá, Colombia.  
25  
26

27  
28 Neil Andersson, Universidad Autónoma de Guerrero, Centro de Investigación de  
29 Enfermedades Tropicales, Acapulco, México.  
30  
31

32  
33 Keywords:

34 Intercultural

35 Dysmenorrhoea

36 Medicine, Traditional

37 Initiation rites  
38  
39  
40  
41  
42

43 **Word count: 2373**  
44  
45  
46  
47  
48  
49  
50  
51  
52  
53  
54  
55  
56  
57  
58  
59  
60

Comment [GZR dic121]: ECh: "Title: Should be amended to..."  
>>Done

**ABSTRACT**

**Objectives:** ~~Investigate the association between self reported dysmenorrhoea and patterns of female initiation rites at menarche among Amazonian indigenous peoples of Vaupés in Colombia.~~ ~~Investigate the association between dysmenorrhoea and the decline of female initiation rites among Amazonian indigenous peoples of Vaupés in Colombia.~~

**Comment [GZR dic122]:** ECh: "First sentence would be more accurate as..."  
>>Done

**Design:** Cross-sectional study of all women in seven indigenous communities. Questionnaire administered in local language documented female initiation rites and experience of dysmenorrhoea. Analysis examined ten initiation components separately, then together, comparing women who underwent all rites, some rites and no rites.

**Settings:** Seven indigenous communities belonging to the Tukano language group in the Great Eastern Reservation of Vaupés (Colombia) in 2008.

**Participants:** All women over the age of 13 years living in the seven communities in Vaupés, who had experienced at least two menstruations ~~(n=185), aged 13 to 88 years (mean 32,5; SD 15.6).~~

**Comment [GZR dic123]:** ECh: "give the age range of the participants"  
>>Done

**Primary and secondary outcome measures:** The analysis rested on pelvic pain to define dysmenorrhoea as main outcome. Women were also asked about other disorders present during menstruation or the precedent days, and about the interval between menstruation and its duration.

**Results:** Only 17.3% (32/185) completed all initiation rites and 52.4% (97/185) reported dysmenorrhoea. Women not completing the rites were more likely to report dysmenorrhoea than those who did so (p=0.01 Fisher exact), taking into account age, education, community, parity, and use of family planning. Women who completed less than the full complement of rites had higher risk than those who completed all rites. Those who did not complete all rites reported increased severity of dysmenorrhoea (p=0.00014).

**Conclusions:** Our results are compatible with ~~an association between traditional practices and women's health~~ ~~protective effect of initiation rites.~~ We could exclude indirect associations with age, education, parity and use of family planning as explanations for the association. The study indicates feasibility, possible utility and limits of inter-cultural epidemiology in small groups.

**Comment [GZR dic124]:** ECh: "avoid any causal language"  
>>Done



1  
2  
3  
4  
5  
6  
7  
8  
9  
10  
11  
12  
13  
14  
15  
16  
17  
18  
19  
20  
21  
22  
23  
24  
25  
26  
27  
28  
29  
30  
31  
32  
33  
34  
35  
36  
37  
38  
39  
40  
41  
42  
43  
44  
45  
46  
47  
48  
49  
50  
51  
52  
53  
54  
55  
56  
57  
58  
59  
60

For peer review only

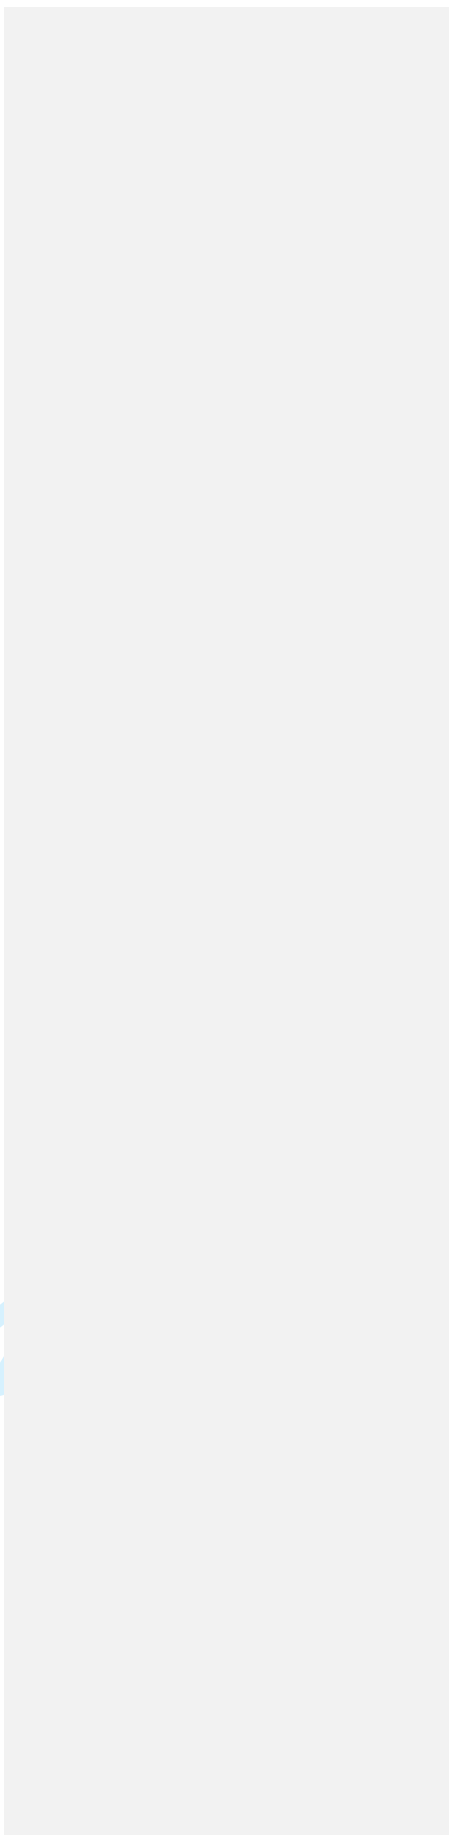

## Article summary

### Article focus

- Female initiation rites and dysmenorrhoea.
- Epidemiology and cultural safety.

### Key messages

- There is an association between what women say about abandoning initiation rites and dysmenorrhoea.
- The study suggests an association between effectiveness of traditional practices and women's health.
- The study proposes the feasibility and usefulness of intercultural epidemiology.

**Comment [GZR dic125]:** ECh: "the study design cannot show more than an association with self reported dysmenorrhea"  
>> Done

**Comment [GZR dic126]:** ECh: "Summary box: avoid any causal inferences."  
>>Done

### Strengths and limitations of this study

- There are no epidemiological studies of indigenous initiation and dysmenorrhoea.
- The small numbers problem is recognized, even with all eligible women participating.

## INTRODUCTION

~~Qualitative research methods, like unstructured conversations, are relatively easily adapted to cultural contexts. This cultural adaptation is less common in epidemiology, which is often perceived as unreceptive to alternative epistemologies.[1] Yet inter-cultural epidemiology can be useful to identify potential health benefits of traditional health practices, many of which are being lost as globalization erodes indigenous cultures.~~

~~This loss of culture is a concern for Amazon indigenous communities, where every year people have less to do with traditional medical practices.[2]~~ The Tatuayo, Bará, Carapana, Tuyuca y Tukano ethnicities in Tukano language group live between the Papurí and Yapú rivers in the Great Eastern Reservation of Vaupés.[1,2] In collective reservations, the seven communities with very similar customs in a subsistence economy. They share traditional rituals around childbirth, management of the umbilicus, rites of sexual début, marriage, pregnancy, menopause and death but, like many traditional cultures, they have abandoned much of this with urbanisation and globalisation of culture.[3]

According to traditional wisdom, young women will be healthy if they complete initiation rites and follow traditional practices during menstruation. Young women in the region go to residential schools outside their communities. The school year follows a national standard, making it difficult for schoolgirls to participate in traditional rites.[4] This loss of culture is a concern for Amazon indigenous communities, where every year people have less to do with traditional medical practices.[5] This research began with the express concern of community elders who, in the course of a decade long partnership with the traditional health systems group at Universidad del Rosario in Colombia, asked if loss of their cultural practices could affect women's reproductive health, particularly dysmenorrhoea.

Qualitative research methods, like unstructured conversations, are relatively easily adapted to address cultural issues like this. Cultural adaptation is less common in epidemiology, which is often perceived as unreceptive to alternative epistemologies.[6] Yet intercultural epidemiology can be useful to identify potential health benefits of traditional health practices, many of which are being lost as globalization erodes indigenous cultures.

Problems related to women's reproductive cycle are increasing worldwide.[7-9] Western medicine has few satisfactory solutions to offer women with dysmenorrhoea, offering an interesting case in point as the World Health Organization calls to explore possible contributions of traditional medicine.[10,11] A sparse epidemiological literature addresses the

**Comment [GZR dic127]:** ECh: "The paper doesn't report whether initiation rites have declined overall in Colombia or even in this sample of women..."  
>>Done

**Comment [GZR dic128]:** ECh: "describe the initiation rites here..."  
>>Because the level of detail does not fit here, we opted to enumerate the component rites in the methods section

**Comment [GZR dic129]:** ECh: "state more clearly that elders posed the question..."  
>>Done

**Comment [GZR dic1210]:** ECh: "the mention of qualitative research"  
>> We consider this mention is necessary in order to explain the importance of intercultural epidemiology. The text has been moved to the third paragraph.

links with dysmenorrhoea and cultural influences.[12, 13] ethnicity and religiosity.[14, 15] Better documented risk factors are diet, exercise, psychological or emotional episodes, and use of alcohol and tobacco.[16-20] We found no epidemiological studies of indigenous initiation rites and dysmenorrhoea. A retrospective survey using a questionnaire evaluated this possible association.

**Comment [GZR dic1211]:** ECh: "state briefly, in the last sentence of the introduction, that this was a retrospective survey using a questionnaire"  
>> Done

## METHODS

**Study population:** All women over the age of 13 years living in the seven communities in Vaupés, who had experienced at least two menstruations (n=185), aged 13 to 88 years (mean 32,5; SD 15,6).

**Outcome:** Interviewers asked if, during menstruation, women suffered pelvic pain, dizziness, headache, bodily pains, and problems in the days prior to menstruation. They also asked about the interval between menstruation and duration of menstruation. The analysis rested on pelvic pain to define dysmenorrhoea.[21-23] The interviewer asked directly about pain and its severity, without asking about duration of pain, proportion of menstruations affected or activities that could not be completed due to the pain. Because pain perception is subjective, we used a well-established graphic approach showing faces with different grades of discomfort (Figure 1).[24] Respondents simply pointed to the face that reflected their experience during menstruation.

**Comment [GZR dic1212]:** ECh: "women were asked about pelvic pain during menstruation - but occurring when and how often?..."  
>>Done

**Exposure:** Traditional healers described initiation rites at the onset of menarche, lasting three to five days, during which time the young women completed a number of discrete activities: each initiate had a god-mother (*madrina*); each had a mentor during the initiation; the initiate spent 3-5 days away from others; she received a diet limited to specific foods; she received a blessing or prayer from the traditional healer; she applied powdered *carayurú*, a vegetable stain (*Arrhabidea chica*); her hair was cut; her body was painted with *we*, another vegetable stain (*Bignoniaceae sp.*); she inhaled *ají*, a hot spice mix (*Capsicum spp.*); and water or a plant precipitated emesis. The questionnaire documented exposure to each component rite (yes/no) separately. Without understanding the exact workings of the initiation rites, we followed the WHO guideline to handle the component activities as a "black box"[25]: we do not always have to understand exactly how a traditional therapy works to measure its effect. We thus documented each of the individual rites.

**Instrument:** A month of consultation with local healers (*payés*) clarified the main research question and a list of culturally appropriate questions. After approval of the questionnaire for

1  
2  
3  
4  
5  
6  
7  
8 semantic and cultural equivalence with the *payés*, the researchers piloted the questionnaire  
9 and pain images with 14 women of the same ethnic group living in Mitu (not part of the  
10 study), their pain report was assessed using the graphic approach showing faces with  
11 different grades of discomfort. The authorities in each community invited all women – by  
12 cultural definition, the first menstruation identifies the woman as an adult – to the communal  
13 hall (*maloka*) where the researchers explained the instrument, issues of confidentiality and  
14 the right to decline to participate or to leave out any question. No eligible woman declined to  
15 participate. Interviewers administered a 37-question instrument through a translator during  
16 December 2008.

17  
18  
19  
20 **Analysis:** Epi-data 3.1 served for manual data capture analysis relied on CIETmap 2.0 beta  
21 8 (Centro de Investigación de Enfermedades Tropicales, Mexico), public domain software  
22 that provides a Windows-like interface with R. Bivariate analysis with each of the 10  
23 component activities examined the relationship of each component rite on its own with  
24 dysmenorrhoea. We also analysed complete and incomplete initiation using sequential  
25 stratification by age of the woman, community of origin (some had more access to Western  
26 ways), education, parity, family planning and menopause. We analysed trend using the  
27 Mantel extension of the Mantel-Haenszel test.[26] We report results as adjusted odds ratios  
28 (aOR) with 95% confidence intervals. The two-tailed Fisher exact test served for estimation  
29 of confidence with the resulting sparse numbers comparisons.

30  
31  
32  
33  
34 Without any prior basis for weighting importance of different activities in the initiation, we  
35 calculated the average effect across the ten components as though each was a separate  
36 exposure; this relied on Meta, an R program. A Forest plot summarises this (Figure 2).  
37 Compared with occurrence among women who completed all ten rites of initiation, a  
38 sensitivity analysis dropped each initiation rite in turn to test relevance of each in initiation.

39  
40  
41 **Control of biases:** Involvement of healers and elders in the design guaranteed cultural fit.  
42 The questionnaire inquired for current family planning, and if so, which is the method used  
43 (plants, pill, injection, condom, pessary, surgery, partner-managed contraception), and  
44 duration of use of each method, as this could affect dysmenorrhoea; hormonal pills can  
45 diminish pain and IUDs can increase pain. Use of Western contraceptive methods also  
46 coincides with Western acculturation. We stratified by contraceptive use to separate between  
47 the effect of the contraceptive and the initiation rites. To avoid an acculturation bias from  
48 interviewing only women who did not go to nearby towns for work, we conducted the study in  
49 December when most return to their homes. We took age, menopause and education into  
50  
51  
52  
53  
54  
55  
56  
57  
58  
59  
60

Comment [GZR dic1213]: ECh: "...The questionnaire was piloted, but were these images piloted too?"  
>>Done

account by stratification to limit the differential influence of these on responses.

**Ethical aspects:** The CIET ethical review committee at the Universidad Autónoma de Guerrero and Research Fund at the Universidad del Rosario in Colombia both approved the proposal. The leadership of each community signed formal agreements for data management and sharing with all participants present, after the researchers had explained to all the nature of the study, how data would be used, confidentiality, and rights to decline participation.[27]

## RESULTS

A total of 185 women participated, representing 70.6% of the 262 women over the age of 12 years identified in the 2006 census. The 77 women excluded had either migrated from the area or they had not completed two menstruations. Of 158 women who knew their age in years, the average was 32.5 years (mode 19 years, SD 15.6). Respondents reported low levels of education, 28.3% (52/184) with no schooling and only 17.4% (32/184 women interviewed) with secondary education. Few used family planning (11.1% based on 15/135 women of reproductive age) with an average of 4.9 children each (SD 2.7).

Table 1: Characteristics of the women included in the sample

| <u>Variable</u>                      | <u>Yes</u> |              | <u>No</u>  |               | <u>Total</u> |
|--------------------------------------|------------|--------------|------------|---------------|--------------|
| <u>Mixed ethnicity</u>               | <u>0</u>   | <u>0.0%</u>  | <u>185</u> | <u>100.0%</u> | <u>185</u>   |
| <u>Born in this community</u>        | <u>94</u>  | <u>51.4%</u> | <u>89</u>  | <u>48.6%</u>  | <u>183</u>   |
| <u>Knew her age</u>                  | <u>158</u> | <u>85.4%</u> | <u>27</u>  | <u>14.6%</u>  | <u>185</u>   |
| <u>Menopausal</u>                    | <u>50</u>  | <u>27.0%</u> | <u>135</u> | <u>73.0%</u>  | <u>185</u>   |
| <u>Had had children</u>              | <u>139</u> | <u>75.1%</u> | <u>46</u>  | <u>24.9%</u>  | <u>185</u>   |
| <u>Using contraceptive methods</u>   | <u>15</u>  | <u>11.1%</u> | <u>120</u> | <u>88.9%</u>  | <u>135</u>   |
| <u>    Using contraceptive pills</u> | <u>0</u>   | <u>0.0%</u>  | <u>=</u>   | <u>=</u>      | <u>=</u>     |
| <u>    Using IUDs</u>                | <u>2</u>   | <u>13.3%</u> | <u>=</u>   | <u>=</u>      | <u>=</u>     |
| <u>    Using plants</u>              | <u>1</u>   | <u>6.7%</u>  | <u>=</u>   | <u>=</u>      | <u>=</u>     |
| <u>    Tubal ligation</u>            | <u>4</u>   | <u>26.7%</u> | <u>=</u>   | <u>=</u>      | <u>=</u>     |
| <u>    Using other methods</u>       | <u>8</u>   | <u>53.3%</u> | <u>=</u>   | <u>=</u>      | <u>=</u>     |

**Comment [GZR dic1214]:** ECh: "Please add a new table 1..."  
>>Done

|                                               |            |              |            |              |            |
|-----------------------------------------------|------------|--------------|------------|--------------|------------|
| <u>Any education level</u>                    | <u>133</u> | <u>71.9%</u> | <u>52</u>  | <u>28.1%</u> | <u>185</u> |
| <u>Lives in a community wit airplane road</u> | <u>118</u> | <u>65.2%</u> | <u>63</u>  | <u>34.8%</u> | <u>181</u> |
| <u>Reported dysmenorrhea</u>                  | <u>97</u>  | <u>52.4%</u> | <u>88</u>  | <u>47.6%</u> | <u>185</u> |
| <u>Rites completion</u>                       | -          | -            | -          | -            | -          |
| <u>All rites completed</u>                    | <u>32</u>  | <u>17.3%</u> | <u>153</u> | <u>82.7%</u> | <u>185</u> |
| <u>No rites at all</u>                        | <u>14</u>  | <u>7.6%</u>  | <u>171</u> | <u>92.4%</u> | <u>185</u> |
| <u>Incomplete rite</u>                        | <u>139</u> | <u>75.1%</u> | <u>46</u>  | <u>24.9%</u> | <u>185</u> |

The average age of menarche was 13.8 years (SD 1.16). Some 52% (97/185) reported dysmenorrhoea and 88.6% (164/185) reported undergoing at least some rite of initiation during menarche. Table 2 shows the proportion involved in each of ten activities identified by traditional healers as the initiation rites. Considering each rite separately, only emesis retained a significant association on its own with dysmenorrhoea, after taking into account age of the woman, community of origin (some had more access to Western ways), parity, family planning by sequential stratification and adjusting for menopause and education. The Forest plot (Figure 2) shows dysmenorrhoea associated with each component rite compared with women who did no rites. The average effect size was OR 1.66 (95%CI 1.35-2.04).

Table 2: Exposure to different aspects of initiation rite and risk of dysmenorrhoea (odds ratio)

| Initiation rite                | % of all women receiving this rite** | Risk of dysmenorrhoea in each subgroup |                    |       |           |
|--------------------------------|--------------------------------------|----------------------------------------|--------------------|-------|-----------|
|                                |                                      | Receiving rite                         | Not receiving rite | aOR*  | 95% CI    |
| Emesis                         | 38.4%                                | 27/71                                  | 70/114             | 0.39* | 0.21 0.70 |
| Cared for during the ceremony  | 76.8%                                | 69/142                                 | 28/43              | 0.51  | 0.25 1.02 |
| Applied <i>carayurú</i> powder | 84.3%                                | 78/156                                 | 19/29              | 0.53  | 0.23 1.19 |
| Spent time in isolation        | 71.9%                                | 64/133                                 | 33/52              | 0.53  | 0.28 1.03 |
| Followed prescribed diet       | 71.9%                                | 64/133                                 | 33/52              | 0.53  | 0.28 1.03 |
| Body painted with we           | 50.8%                                | 44/94                                  | 53/91              | 0.63  | 0.35 1.12 |
| Had a godmother                | 50.8%                                | 45/94                                  | 50/88              | 0.70  | 0.39 1.25 |

|                               |       |        |       |      |      |      |
|-------------------------------|-------|--------|-------|------|------|------|
| Cut hair                      | 68.6% | 64/127 | 33/58 | 0.77 | 0.41 | 1.45 |
| Inhaled <i>aji</i>            | 49.2% | 45/91  | 52/94 | 0.79 | 0.44 | 1.41 |
| Blessed by traditional healer | 88.6% | 85/164 | 12/21 | 0.81 | 0.32 | 2.04 |

\* Adjusted for age and level of education in a stratified analysis..

\*\* Total 185 women; no missing data

To understand the role of each rite in relation to dysmenorrhoea, a sensitivity analysis compared dysmenorrhoea rates among women who did all ten rites (n=32) with women who participated in less than the ten, dropping each rite in turn. Figure 3 shows the unadjusted odds of dysmenorrhoea for all rites compared with failing to do specific rites, and those who did no rites. Those who completed the 10 rites (8/32) contrasted sharply with those who completed some or no rites (89/153) (p-Fisher 0.001).

Table 3: Sensitivity analysis of initiation rites and dysmenorrhoea contrasting women who completed all rites and those who completed only one component rite.

**Comment [GZR dic1215]:** ECh: "also add a table to show the adjusted/ sensitivity analyses" >>Done

|                                | n   | Frequencies |      |         |      | Risk of dysmenorrhoea |          |            |       |
|--------------------------------|-----|-------------|------|---------|------|-----------------------|----------|------------|-------|
|                                |     | No          | Yes  | p-value | OR   | 95% CI                | p-Fisher |            |       |
| None                           | 46  | 14          | 30.4 | 32      | 69.6 | 0.001                 | 7.5      | 1.95-28.7  | 0.001 |
| Emesis                         | 71  | 39          | 54.9 | 32      | 45.1 | 0.001                 | 2.85     | 1.04-7.82  | 0.050 |
| Cared for during the ceremony  | 142 | 110         | 77.5 | 32      | 22.5 | 0.001                 | 3.73     | 1.59-8.78  | 0.001 |
| Followed prescribed diet       | 133 | 101         | 75.9 | 32      | 24.1 | 0.001                 | 3.73     | 1.58-8.85  | 0.001 |
| Spent time in isolation        | 133 | 101         | 75.9 | 32      | 24.1 | 0.001                 | 3.73     | 1.58-8.85  | 0.001 |
| Applied <i>carayurú</i> powder | 156 | 124         | 79.5 | 32      | 20.5 | 0.001                 | 3.89     | 1.68-9.02  | 0.001 |
| Blessed by traditional healer  | 164 | 132         | 80.5 | 32      | 19.5 | 0.001                 | 4.20     | 1.83-9.66  | 0.001 |
| Body painted with <i>we</i>    | 94  | 62          | 66.0 | 32      | 34.0 | 0.001                 | 4.15     | 1.65-10.4  | 0.001 |
| Cut hair                       | 127 | 95          | 74.8 | 32      | 25.8 | 0.001                 | 4.31     | 1.81-10.2  | 0.001 |
| Had a godmother                | 94  | 62          | 66.0 | 32      | 34.0 | 0.001                 | 4.44     | 1.77-11.1  | 0.001 |
| Inhaled <i>aji</i>             | 91  | 59          | 64.8 | 32      | 35.2 | 0.001                 | 5.05     | 1.99-12.77 | 0.001 |

Most respondents with dysmenorrhoea (92/97) reported severity using the Wong-Baker Faces Pain Rating Scale. Table 4 shows a statistically significant increase across five levels of severity for those who completed all rites compared with those who did any or no rites (p=0.0014). It also contrasts those who did no rites with those who completed all rites (p=0.0039).

Table 4: Completion of initiation rites and reported intensity of dysmenorrhoea

|  | No dysmenorrhoea | Intensity of dysmenorrhoea |
|--|------------------|----------------------------|
|  |                  |                            |



|                        | 0  | 1                                                                       | 2            | 3            | 4 y 5        |
|------------------------|----|-------------------------------------------------------------------------|--------------|--------------|--------------|
| Incomplete or no rites | 64 | 18                                                                      | 20           | 19           | 27           |
| All rites completed    | 24 | 2                                                                       | 4            | 1            | 1            |
| Total                  | 88 | 20                                                                      | 24           | 20           | 28           |
| OR                     |    | 3.94                                                                    | 3.49         | 6.76         | 6.92         |
| 95%CI                  |    | 1.72 - 9.00                                                             | 1.41 - 8.64  | 1.84 - 24.93 | 1.17 - 40.88 |
|                        |    | Mantel-Haenszel chi square for linear trend = 10.16<br>p-value = 0.0014 |              |              |              |
| No rites at all        | 4  | 1                                                                       | 3            | 3            | 2            |
| All rites completed    | 24 | 2                                                                       | 4            | 1            | 1            |
| Total                  | 28 | 3                                                                       | 7            | 4            | 3            |
| OR                     |    | 6.75                                                                    | 6.93         | 9.38         | 5.64         |
| IC 95%                 |    | 1.72 - 26.42                                                            | 1.77 - 27.17 | 1.82 - 48.41 | 0.57 - 55.87 |
| P-Fisher               |    | 0.01                                                                    | 0.01         | 0.02         | 0.2          |
|                        |    | Mantel-Haenszel chi square for linear trend = 8.33; p-value = 0.0039    |              |              |              |

## DISCUSSION

Our results support the idea that abandoning traditional initiation rites, or adopting practices that go along with abandoning these rites, is a risk factor for dysmenorrhoea. Emesis was the single strongest protective rite on its own, but sensitivity analysis showed a consistent effect of the other rites for those who did not abandon the initiation practices. The apparent lack of specific effects of each component rite supports the idea that synergy between all components completes the protective effect.

The average age of menarche of our sample was higher than typically reported in the literature,[28-33] possibly indicating a relatively low level of secular change.[34,35] That one half of the women reported dysmenorrhoea (97/185) is lower than reported in international studies.[36-40] Although the local definition (facial expressions) was useful for internal

**Comment [GZR dic1216]:** ECh: "state principal findings first..."  
>>Done.

1  
2  
3  
4  
5  
6  
7  
8 comparisons, it is of limited value in international comparisons.

9  
10 This study faced several common challenges in inter-cultural epidemiology. Even with all  
11 eligible women participating, the small numbers problem is well recognised and has no easy  
12 solution.[41,42] As anticipated, we found it difficult to untangle issues like use of  
13 contraceptives and reporting of age, given the effect of acculturation on these. Despite this  
14 interdependence of exposures, we believe we were able to show an independent effect of  
15 initiation rites.

16  
17  
18 Cultural issues probably reduced the effectiveness of the study and reduced the numbers  
19 further. The 14.6% (27/185) of women who could not give their age in calendar years is  
20 testimony to their distance from Western culture. Analysing only those who mention an age  
21 included a cultural filter, limiting our conclusions to those with some measure of Western  
22 acculturation. Recall bias might have affected the results as some women had to remember  
23 rites that took place decades earlier; a social desirability bias (not wanting to be culturally  
24 different, wanting to avoid disapproval) might also have influenced the results. We have no  
25 additional information to clarify the directions of these biases.

26  
27  
28  
29 Within these constraints and the stringent limits imposed by our population size, we tried to  
30 take account of other acculturation issues, beyond initiation rites, by stratifying for education,  
31 age, parity, community of residence (some had greater access to modern towns) and use of  
32 family planning. The lower risk associated with initiation rites might still be due to  
33 unmeasured lifestyle issues associated with maintaining initiation rites. Solving this issue  
34 may require a randomised controlled trial where the differential support for the fulfilment of  
35 the rite among communities be contrasted with the occurrence of dysmenorrhoea.

36  
37  
38  
39 Since the 1950s, public health programmes have contemplated primary, secondary and  
40 tertiary prevention. More recently, *primordial prevention* identified social, economic and  
41 cultural patterns that affect risks.[43] Within its limitations, our study is compatible with the  
42 idea that primary or primordial prevention of dysmenorrhoea might be possible for indigenous  
43 women who are increasingly in contact with Western ways.

#### 44 45 46 **CONCLUSIONS**

47  
48 Without adding insight into exact mechanisms, this cross-sectional study shows an  
49 association between abandoning initiation rites and dysmenorrhoea. No one of the rites on  
50 its own explains this association.

51  
52 Inter-cultural approaches have received little attention in the epidemiological literature, and  
53  
54  
55  
56  
57  
58  
59  
60

**Comment [GZR dic1217]:** ECh: "discuss the subgroup analyses with caution, as the numbers are very small and the overall study design is relatively weak"  
>>Done

**Comment [ISC18]:** ECh: "recall bias (some of the women had to remember rites that took place decades earlier) and social desirability bias..."  
>>Done

**Comment [ISC19]:** ECh: "presumably it wasn't possible to conduct a prospective study - say why not"  
>>Done  
>>We believe it can be a second step in the research process.

1  
2  
3  
4  
5  
6  
7  
8  
9  
10  
11  
12  
13  
14  
15  
16  
17  
18  
19  
20  
21  
22  
23  
24  
25  
26  
27  
28  
29  
30  
31  
32  
33  
34  
35  
36  
37  
38  
39  
40  
41  
42  
43  
44  
45  
46  
47  
48  
49  
50  
51  
52  
53  
54  
55  
56  
57  
58  
59  
60

these need further investment. In this study, the indigenous leaders of the seven communities requested the study and set the research question; they specified the cultural exposures of interest; they participated in the design and testing of instruments; they led interpretation of results; and they are the primary research users, sharing the results with their communities in support of traditional health practices.

Without underestimating the remaining intercultural challenges, the difficulties of research in small populations and the limits of observational studies, we feel this study achieves a first step in culturally safe descriptive epidemiology of traditional medicine: a longer term dialogue led to the research question and design; the indigenous leaders defined the exposure of interest; the ethical review process fitted with indigenous ethical concepts; it generated evidence suggesting an effective traditional practice, without understanding how this works.

## ACKNOWLEDGMENTS

Field work was financed by The Research Fund of Universidad del Rosario. Benedicto Mejía and Efraín Mejía, along with other *payés* (wise men, healers) from the seven communities participated in formulation of research questions, design, application of the instrument and interpretation of results. Alicia Jaramillo and Guillermina Ferrer translated the questions during the application of the instrument. Carolina Amaya and Natalia Reinoso carried out the pilot study and the research instrument application in the seven communities. Iván Sarmiento helped with data analysis, tables and figures elaboration and revision of citations and bibliographic references. Andrés Cañón and Sebastián Luna collaborated with the systematic review of cultural risk factors for dysmenorrhea.

## COMPETING INTERESTS

We, the authors, declare that there are no conflicts of interest in this study regarding the Indigenous communities that took part, the recognised rights of the Indigenous Peoples, or the financing institutions.

## FUNDING

Fieldwork was financed by The Research Fund of Universidad del Rosario. Germán Zuluaga, MD, MSc carried out the research project as part fulfilment of the requirements of MSc (Epidemiology) at the Universidad Autónoma de Guerrero.

## FIGURE LEGENDS

Figure 1: Wong-Baker Faces Pain Rating Scale

Figure 2: Forest plot of individual initiation rites and risk of dysmenorrhoea

Figure 3: Sensitivity analysis compared dysmenorrhoea risk among women who did all ten rites (n=32) compared with women who did not do at least one rite, and those who did no rite (listing shows excluded rites)

1  
2  
3  
4  
5  
6  
7  
8 **REFERENCE LIST**  
9  
10  
11  
12  
13

- 
- 14 1. Dirección de Etnias del Ministerio del Interior y de Justicia. *Resolución no. 0006 de 26 de*  
15 *enero de 2005, por medio de la cual se inscribe en el registro de asociaciones de*  
16 *autoridades tradicionales y/o cabildos la constitución de la asociación de autoridades*  
17 *tradicionales indígenas de la zona de Yapú - ASATRIZY*. Bogotá (CO): Min. Int. Just, 2005.  
18  
19 2. Sarmiento I, Amaya C. *Plan de vida: unidos con un solo pensamiento para vivir bien*.  
20 Asociación de Autoridades Tradicionales Indígenas de la Zona de Yapú. Bogota, Colombia  
21 2008.  
22  
23 3. Sarmiento I, Amaya C. Asociación de Autoridades Tradicionales Indígenas de la Zona de  
24 Yapú. *Historia y origen del proceso de un Nuevo despertar*. Bogotá, Colombia, 2008.  
25  
26 4. Rembeck GI, Gunnarsson RK. Improving pre- and postmenarcheal 12-year-old girls'  
27 attitudes toward menstruation. *Health Care Women Int*. 2004;**25**:680-98.  
28  
29 5. Piñeros-Petersen M, Ruiz-Salguero M. Aspectos demográficos en comunidades indígenas  
30 de tres regiones de Colombia. *Salud Pública Mex* 1998;**40**:324-329.  
31  
32 6. Cameron M, Andersson N, and Ledogar RJ. Culturally safe epidemiology: oxymoron or  
33 scientific imperative. *Pimatisiwin: Journal of Aboriginal and Indigenous Community Health*  
34 2010;**8**(2):89-116.  
35  
36 7. World Health Organization. *Engaging for Health*. □ *11th General Program of Work 2006-*  
37 *2015, a Global Health Agenda*. Geneva (CH): WHO, 2006. (Working paper GPW/2006-  
38 2015). Available at: [http://whqlibdoc.who.int/publications/2006/GPW\\_eng.pdf](http://whqlibdoc.who.int/publications/2006/GPW_eng.pdf). Accessed  
39 October 15, 2008.  
40  
41 8. Rodríguez J. *Descripción de la mortalidad por departamentos: Colombia año 2000*. Bogotá  
42 (CO): Pontificia Universidad Javeriana, Cendex. (Working Paper ASS /DT 016-05). Available  
43 at: <http://www.cendex.org.co/pdf/DT016-05.pdf>. Accessed January 15, 2008.  
44  
45 9. García-Pérez H, Harlow SD, Erdmann CA, Denman C. Pelvic pain and associated  
46 characteristics among women in northern Mexico. *Int Perspect Sex Reprod Health*.  
47 2010;**36**:90-8.  
48  
49  
50  
51  
52  
53  
54  
55  
56  
57  
58  
59  
60

10. World Health Organization. *Traditional Medicine and Health Coverage*. Geneva: WHO, 1983.
11. World Health Organization. *WHO Traditional Medicine Strategy: 2002-2005*. Geneva, (CH): WHO, 2002.
12. Garg S, Sharma N, Sahay R. Socio-cultural aspects of menstruation in an urban slum in Delhi, India. *Reprod Health Matters* 2001;**9**:16-25.
13. Avasarala AK, Panchangam S. Dysmenorrhoea in different settings: are the rural and urban adolescent girls perceiving and managing the dysmenorrhoea problem differently? *Indian J Community Med* 2008;**33**:246-249.
14. Goldstein-Ferber S, Granot M. The association between somatization and perceived ability: roles in dysmenorrhea among israeli arab adolescents. *Psychosom Med* 2006;**68**:136-142.
15. Marván ML, Vacio A, García-Yañez G, *et al*. Attitudes toward menarche among Mexican pre-adolescents. *Women Health* 2007;**46**:7-23.
16. Latthe P, Mignini L, Gray R, *et al*. Factors predisposing women to chronic pelvic pain: systematic review. *BMJ* 2006;**332**:749-755.
17. Patel A, Tanksale V, Sahasrabhojane M, *et al*. The burden and determinants of dysmenorrhoea: a population-based survey of 2262 women in Goa, India. *BJOG* 2006;**113**:453-463.
18. Balbi C, Musone R, Menditto A, *et al*. Influence of menstrual factors and dietary habits on menstrual pain in adolescence age. *Eur J Obstet Gynecol Reprod Biol* 2000;**91**:143-148.
19. Proctor ML, Murphy PA. Herbal and dietary therapies for primary and secondary dysmenorrhoea. *Cochrane Database Syst Rev* 2001;**(3)**:CD002124.
20. Parazzini F, Tozzi L, Mezzopane R, *et al*. Cigarette smoking, alcohol consumption, and risk of primary dysmenorrhea. *Epidemiology* 1994;**5**:469-472.
21. Mazza D. *Women's Health in General Practice*. Oxford: Butterworth Heinemann, 2004.
22. Deb Sh, Raine-Fenning N. Dysmenorrhoea. *Obstetrics, Gynaecology and Reproductive Medicine* 2008;**18**:294-299.

- 1  
2  
3  
4  
5  
6  
7  
8  
9 23. Dawood MY. Primary dysmenorrhoea: advances in pathogenesis and management.  
10 *Obstet Gynecol* 2006;**108**:428-441.
- 11  
12 24. Wong D, Whaley L. *Clinical handbook of pediatric nursing*. 2nd ed. Saint Louis (MO):  
13 Mosby Company, 1986. Quoted by: National Institutes of Health, NIH Pain Consortium. Pain  
14 intensity scales – Wong-Baker faces pain rating scale [NIH Pain Consortium Web site]. July  
15 17, 2007. [http://painconsortium.nih.gov/pain\\_scales/Wong-Baker\\_Faces.pdf](http://painconsortium.nih.gov/pain_scales/Wong-Baker_Faces.pdf) (accessed 24  
16 April 2012).
- 17  
18 25. World Health Organization. *General Guidelines for Methodologies on Research and*  
19 *Evaluation of Traditional Medicine*. Geneva (CH): WHO, 2000. (Working paper  
20 WHO/EDM/TRM/2000.1)
- 21  
22 26. Leuraud K, Benichou J: Tests for monotonic trend from case control data: Cochran-  
23 Armitage-Mantel trend test, isotonic regression and single and multiple contrast tests.  
24 *Biometrical Journal* 2004;46:731-749
- 25  
26 27. Grupo de Estudios en Sistemas Tradicionales de Salud. Principios éticos para estudios  
27 médicos aplicados a los sistemas tradicionales de salud 2008.  
28 [http://www.cemi.org.co/images/PRINCIPIOS\\_ETICOS\\_GESTS\\_CEMI.pdf](http://www.cemi.org.co/images/PRINCIPIOS_ETICOS_GESTS_CEMI.pdf) (accessed 14 Jun  
29 2010).
- 30  
31 28. Vera Y, Hidalgo G, Gollo O, *et al*. Edad de la menarquia y su relación con el estrato social  
32 en cinco estados venezolanos. *Acta Cient Estud* 2009;**7**:130-135.
- 33  
34 29. Ulate G. Edad de la menarquia en el Valle Central de Costa Rica y factores asociados a  
35 su aparición. *Rev Costarric Cienc Med* 1995;**16**:37-41.
- 36  
37 30. Fonseca J, Aguilar O. Edad de la Menarquia en San Pedro Sula. *Rev Med Hondur*  
38 1991;**59**: 4-7.
- 39  
40 31. Hernández I, Unanue N, Gaete X, *et al*. Edad de la menarquia y su relación con el nivel  
41 socioeconómico e índice de masa corporal. *Rev Med Chil* 2007;**135**:1429-1436.
- 42  
43 32. Sharma N, Vaid S, Manhas A. Age at menarche in two caste groups (brahmins and  
44 rajputs) from rural areas of Jammu. *Anthropologist* 2006;**8**:55-7.
- 45  
46 33. Romans SE, Martin JM, Gendall K, *et al*. Age of menarche: the role of some psychosocial  
47 factors. *Psychol Med* 2003;**33**:933-939.
- 48  
49  
50  
51  
52  
53  
54  
55  
56  
57  
58  
59  
60

- 1  
2  
3  
4  
5  
6  
7  
8  
9  
10  
11  
12  
13  
14  
15  
16  
17  
18  
19  
20  
21  
22  
23  
24  
25  
26  
27  
28  
29  
30  
31  
32  
33  
34  
35  
36  
37  
38  
39  
40  
41  
42  
43  
44  
45  
46  
47  
48  
49  
50  
51  
52  
53  
54  
55  
56  
57  
58  
59  
60
34. Padez C. Social background and age at menarche in portuguese university students: a note on the secular changes in Portugal. *Am J Hum Biol* 2003;**15**:415-427.
35. Tanner JM. *Growth at Adolescence*. 2nd ed. Oxford: Blackwell, 1962. Quoted by: Korah L. Knowledge and perceptions regarding menstruation among adolescent girls: a research study. *Nurs J India* 1991;**82**:205-209.
36. Woods NF, Most A, Dery GK. Prevalence of perimenstrual symptoms. *Am J Public Health* 1982;**72**:1257-1264.
37. Klein JR, Litt IF. Epidemiology of adolescent dysmenorrhea. *Pediatrics* 1981;**68**:661-664.
38. Wilson CA, Keye WRJ. A survey of adolescent dysmenorrhea and premenstrual symptom frequency, a model program for prevention, detection, and treatment. *J Adolesc Health Care*. 1989;**10**:317-322.
39. Jamieson D, Steege J. Prevalence of dysmenorrhoea, dyspareunia, pelvic pain and irritable bowle syndrome in primary care practices. *Obstet Gynecol* 1996;**87**:55-58.
40. Latthe P, Latthe M, Say L, *et al*. WHO systematic review of prevalence of chronic pelvic pain: a neglected reproductive health morbidity. *BMC Public Health* 2006;**6**:177.
41. Andresen EM, Diehr PH, Luke DA. Public health surveillance of low-frequency populations. *Annu Rev Public Health* 2004;**25**:25-52.
42. Monasta L, Andersson N, Ledogar RJ, *et al*. Minority health and small numbers epidemiology: a case study of living conditions and health of children in five foreign Roma camps in Italy. *Am J Public Health* 2008;**98**:2035-2041.
43. Bonita R, Beaglehole R, Kjellström T, Basic Epidemiology, Second Edition World Health Organization, Geneva 2006 p103



1  
2  
3  
4  
5  
6  
7  
8  
9  
10  
11  
12  
13  
14  
15  
16  
17  
18  
19  
20  
21  
22  
23  
24  
25  
26  
27  
28  
29  
30  
31  
32  
33  
34  
35  
36  
37  
38  
39  
40  
41  
42  
43  
44  
45  
46  
47  
48  
49  
50  
51  
52  
53  
54  
55  
56  
57  
58  
59  
60



Wong-Baker Faces Pain Rating Scale  
180x59mm (300 x 300 DPI)

peer review only



Forest plot of individual initiation rites and risk of dysmenorrhoea  
180x114mm (300 x 300 DPI)

Review only

1  
2  
3  
4  
5  
6  
7  
8  
9  
10  
11  
12  
13  
14  
15  
16  
17  
18  
19  
20  
21  
22  
23  
24  
25  
26  
27  
28  
29  
30  
31  
32  
33  
34  
35  
36  
37  
38  
39  
40  
41  
42  
43  
44  
45  
46  
47  
48  
49  
50  
51  
52  
53  
54  
55  
56  
57  
58  
59  
60

1  
2  
3  
4  
5  
6  
7  
8  
9  
10  
11  
12  
13  
14  
15  
16  
17  
18  
19  
20  
21  
22  
23  
24  
25  
26  
27  
28  
29  
30  
31  
32  
33  
34  
35  
36  
37  
38  
39  
40  
41  
42  
43  
44  
45  
46  
47  
48  
49  
50  
51  
52  
53  
54  
55  
56  
57  
58  
59  
60

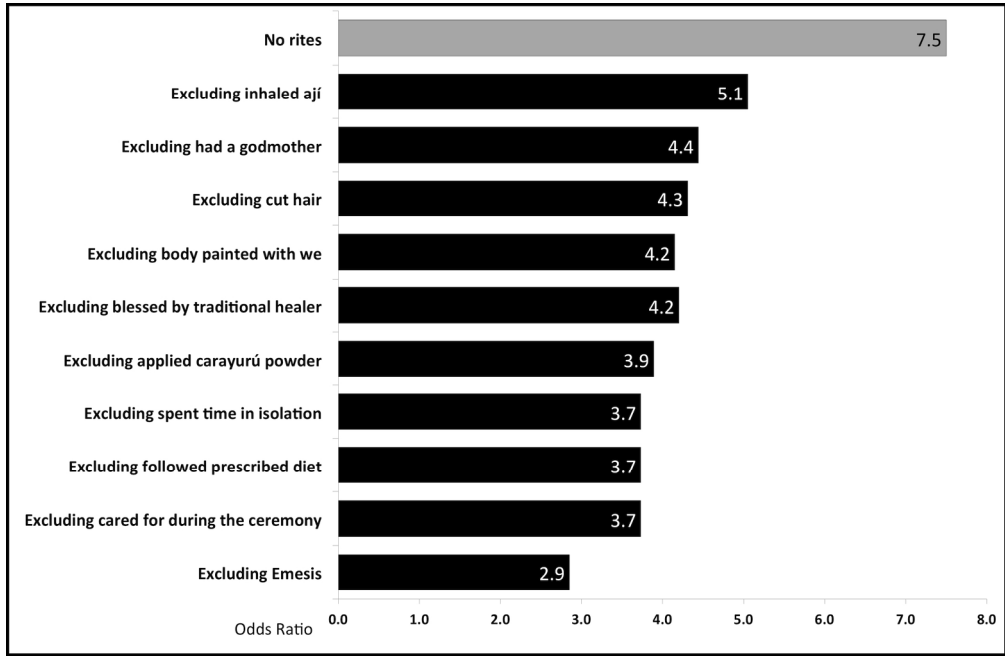

Sensitivity analysis compared dysmenorrhoea risk among women who did all ten rites (n=32) compared with women who did not do at least one rite, and those who did no rite (listing shows excluded rites)  
180x117mm (300 x 300 DPI)

STROBE 2007 (v4) Statement—Checklist of items that should be included in reports of *cross-sectional studies*

| Section/Topic            | Item # | Recommendation                                                                                                                                                                       | Reported on page #                                                       |
|--------------------------|--------|--------------------------------------------------------------------------------------------------------------------------------------------------------------------------------------|--------------------------------------------------------------------------|
| Title and abstract       | 1      | (a) Indicate the study's design with a commonly used term in the title or the abstract                                                                                               | "Cross-sectional studies" appears in title                               |
|                          |        | (b) Provide in the abstract an informative and balanced summary of what was done and what was found                                                                                  | Structured abstract provided                                             |
| <b>Introduction</b>      |        |                                                                                                                                                                                      |                                                                          |
| Background/rationale     | 2      | Explain the scientific background and rationale for the investigation being reported                                                                                                 | Abstract and para 1 and 3 of introduction (p3)                           |
| Objectives               | 3      | State specific objectives, including any prespecified hypotheses                                                                                                                     | Abstract and para 2 Introduction (p3)                                    |
| <b>Methods</b>           |        |                                                                                                                                                                                      |                                                                          |
| Study design             | 4      | Present key elements of study design early in the paper                                                                                                                              | Abstract, paras 1 and 3 of Introduction (p1), para 3 of Discussion (p11) |
| Setting                  | 5      | Describe the setting, locations, and relevant dates, including periods of recruitment, exposure, follow-up, and data collection                                                      | Methods (p3 and p4)                                                      |
| Participants             | 6      | (a) Give the eligibility criteria, and the sources and methods of selection of participants                                                                                          | First para of Methods, p3                                                |
| Variables                | 7      | Clearly define all outcomes, exposures, predictors, potential confounders, and effect modifiers. Give diagnostic criteria, if applicable                                             | Paras 2-3 of Methods (p4), and para 2 of Discussion (p10)                |
| Data sources/measurement | 8*     | For each variable of interest, give sources of data and details of methods of assessment (measurement). Describe comparability of assessment methods if there is more than one group | Paras 2-3 of Methods (p4)                                                |
| Bias                     | 9      | Describe any efforts to address potential sources of bias                                                                                                                            | Para 7 of Methods (p5)                                                   |
| Study size               | 10     | Explain how the study size was arrived at                                                                                                                                            | Para 3 of Discussion (p10), all available women were included.           |

|                        |     |                                                                                                                                                                                                              |                                                                                          |
|------------------------|-----|--------------------------------------------------------------------------------------------------------------------------------------------------------------------------------------------------------------|------------------------------------------------------------------------------------------|
| Quantitative variables | 11  | Explain how quantitative variables were handled in the analyses. If applicable, describe which groupings were chosen and why                                                                                 | Abstract, paras 2, 3, 5, 6 of Methods (p4 and p5), para 5 Discussion (p10)               |
| Statistical methods    | 12  | (a) Describe all statistical methods, including those used to control for confounding                                                                                                                        | Paras 5-6 of Methods (p5)                                                                |
|                        |     | (b) Describe any methods used to examine subgroups and interactions                                                                                                                                          | Para 5 of Discussion (p10)                                                               |
|                        |     | (c) Explain how missing data were addressed                                                                                                                                                                  | Para 2 of Results (p7)                                                                   |
|                        |     | (d) If applicable, describe analytical methods taking account of sampling strategy                                                                                                                           | Paras 5-6 of Methods (p5)                                                                |
|                        |     | (e) Describe any sensitivity analyses                                                                                                                                                                        | Para 3 of Results (Figure 3 and Table 3) (p8)                                            |
| <b>Results</b>         |     |                                                                                                                                                                                                              |                                                                                          |
| Participants           | 13* | (a) Report numbers of individuals at each stage of study—eg numbers potentially eligible, examined for eligibility, confirmed eligible, included in the study, completing follow-up, and analysed            | Para 1 of Results (p6), para 1 of methods (p4)                                           |
|                        |     | (b) Give reasons for non-participation at each stage                                                                                                                                                         | Para 1 of Results (p6)                                                                   |
|                        |     | (c) Consider use of a flow diagram                                                                                                                                                                           | Not applicable                                                                           |
| Descriptive data       | 14* | (a) Give characteristics of study participants (eg demographic, clinical, social) and information on exposures and potential confounders                                                                     | Para 2 of Introduction (p3), para 1 of Methods (p4), para 1 of Results (p6), and Table 1 |
|                        |     | (b) Indicate number of participants with missing data for each variable of interest                                                                                                                          | Para 1 of Results (p6)                                                                   |
| Outcome data           | 15* | Report numbers of outcome events or summary measures                                                                                                                                                         | Para 2-5 of Results (p6 and p7)                                                          |
| Main results           | 16  | (a) Give unadjusted estimates and, if applicable, confounder-adjusted estimates and their precision (eg, 95% confidence interval). Make clear which confounders were adjusted for and why they were included | Tables 2, 3 and 4                                                                        |
|                        |     | (b) Report category boundaries when continuous variables were categorized                                                                                                                                    | Tables 2 and 4                                                                           |
|                        |     | (c) If relevant, consider translating estimates of relative risk into absolute risk for a meaningful time period                                                                                             | Not Applicable                                                                           |
| Other analyses         | 17  | Report other analyses done—eg analyses of subgroups and interactions, and sensitivity analyses                                                                                                               | Table 3 and 4 and Figure 2                                                               |
| <b>Discussion</b>      |     |                                                                                                                                                                                                              |                                                                                          |
| Key results            | 18  | Summarise key results with reference to study objectives                                                                                                                                                     | Paras 2, 4, 5 of Results (p6 and p7), para 5 of Discussion (p10)                         |

|                          |    |                                                                                                                                                                            |                                                                                                        |
|--------------------------|----|----------------------------------------------------------------------------------------------------------------------------------------------------------------------------|--------------------------------------------------------------------------------------------------------|
| Limitations              | 19 | Discuss limitations of the study, taking into account sources of potential bias or imprecision. Discuss both direction and magnitude of any potential bias                 | Abstract, para 1 of Introduction (p3), para 7 of Methods (p6), paras 1 to 5 of Discussion (p9 and p10) |
| Interpretation           | 20 | Give a cautious overall interpretation of results considering objectives, limitations, multiplicity of analyses, results from similar studies, and other relevant evidence | Abstract and Discussion                                                                                |
| Generalisability         | 21 | Discuss the generalisability (external validity) of the study results                                                                                                      | Paras 2, 3, 5 and 7 of Discussion (p10)                                                                |
| <b>Other information</b> |    |                                                                                                                                                                            |                                                                                                        |
| Funding                  | 22 | Give the source of funding and the role of the funders for the present study and, if applicable, for the original study on which the present article is based              | P12                                                                                                    |

\*Give information separately for cases and controls in case-control studies and, if applicable, for exposed and unexposed groups in cohort and cross-sectional studies.

**Note:** An Explanation and Elaboration article discusses each checklist item and gives methodological background and published examples of transparent reporting. The STROBE checklist is best used in conjunction with this article (freely available on the Web sites of PLoS Medicine at <http://www.plosmedicine.org/>, Annals of Internal Medicine at <http://www.annals.org/>, and Epidemiology at <http://www.epidem.com/>). Information on the STROBE Initiative is available at [www.strobe-statement.org](http://www.strobe-statement.org).

## CONVENIO PARA COMPARTIR INFORMACIÓN

**ENTRE:** La Asociación de Autoridades Tradicionales Indígenas de la Zona de Yapú, ASATRIZY, representada por su Junta Directiva.

**Y:** El Grupo de Estudios en Sistemas Tradicionales de Salud de la Facultad de Medicina de la Universidad del Rosario (GESTS) y el Centro de Estudios Médicos Interculturales (CEMI), representados por su director.

### 1. Preámbulo

El presente convenio reconoce y respeta el derecho a la autodeterminación de los pueblos indígenas de la zona de Yapú, en el marco de los cinco derechos fundamentales de los pueblos indígenas reconocidos por la Constitución Política de 1991, la Ley 21 de 1991 de la República de Colombia, aprobatoria del Convenio # 169 de la Organización Internacional del Trabajo, y su naturaleza jurídica de entidad de derecho público de carácter especial, que incluye la potestad para tomar decisiones sobre investigación en sus comunidades. Se considera que los beneficios a las comunidades, a cada región y al esfuerzo nacional se deben fortalecer por medio de la investigación, culturalmente sensible. La investigación tiene que facilitar la propiedad y el manejo por parte de las comunidades de la información sobre su salud y contribuir con la promoción de estilos de vida saludables, prácticas y planeación efectiva de programas, en el marco de sus Planes de Vida.

### 2. Propósito

El presente convenio define los términos para compartir información entre Asatrizy y el GESTS, en relación con los datos recogidos en el *Estudio epidemiológico para un programa de intervención en atención primaria de salud para la promoción y prevención de las enfermedades relacionadas con el ciclo reproductivo de las mujeres indígenas en comunidades del Vaupés*, (en adelante el Proyecto). El propósito del presente convenio es formalizar un acuerdo entre ASATRIZY y el GESTS, respecto de la ejecución del proyecto de investigación, incluyendo la propiedad y el manejo de todos los datos recogidos como parte del proyecto.

### 3. Antecedentes

La Asociación de Autoridades Tradicionales Indígenas de la Zona de Yapú está conformada por siete capitanías vecinas a los ríos Papurí, Yapú y Caño Colorado, en el departamento del Vaupés y tiene como propósito impulsar y liderar la ejecución del Plan de Vida promoviendo la cultura, los valores y las normas tradicionales de manera que permita el desarrollo integral y la conservación física y cultural de la comunidad.

El Grupo de Estudios en Sistemas Tradicionales de Salud de la facultad de medicina de la Universidad del Rosario, reconocido formalmente por COLCIENCIAS desde el año 2002, tiene como objetivo aportar al estudio, conservación, recuperación y promoción de los sistemas médicos tradicionales para contribuir al mejoramiento de la salud humana.

El Centro de Estudios Médicos Interculturales, CEMI, es una organización no gubernamental colombiana, sin ánimo de lucro, cuyo objetivo es contribuir al desarrollo de una política intercultural de salud, mediante el estudio, la evaluación, el diseño y la aplicación de estrategias de atención en las que se amplía la noción del concepto salud-enfermedad, considerando los aspectos culturales y ambientales.

1  
2  
3  
4 Integrantes del GESTS y del CEMI vienen acompañando a las comunidades indígenas de Yapú  
5 en su proceso de organización, diseño y ejecución del Plan de Vida, siempre procurando la  
6 protección de la diversidad biológica y la defensa de la cultura y los conocimientos  
7 tradicionales. En noviembre de 2007 Asatrizy y el CEMI firmaron un convenio de  
8 acompañamiento que tiene vigencia hasta junio de 2009, el cual incluye reglas claras sobre el  
9 manejo compartido de la información resultante del trabajo conjunto y que tienen vigencia para  
10 el presente convenio.  
11

12  
13 Asatrizy, después de tres años de trabajo comunitario, en mayo de 2007 estableció el Plan de  
14 Vida, uno de cuyos capítulos promueve la construcción de un modelo propio de atención de  
15 salud, basado en la defensa y promoción de la cultura y los conocimientos tradicionales, pero  
16 procurando una prudente y respetuosa articulación con el sistema occidental de salud.  
17

18  
19 Para esto Asatrizy ha pedido al Dr. Zuluaga su acompañamiento, de manera que se pueda  
20 trabajar conjuntamente, conscientes de que las comunidades están siendo afectadas por  
21 muchos problemas de salud que no siempre tienen solución con la medicina occidental y que  
22 se han perdido muchas tradiciones y prácticas culturales que antes mantenían la salud. Esto  
23 incluye el desarrollo de un programa de recuperación y promoción de conocimientos  
24 tradicionales y prácticas de autocuidado.  
25

26 En la reunión de Junta Directiva de enero 11 de 2008 recibimos información sobre la propuesta  
27 de investigación que el CEMI propone realizar en nuestras comunidades, en el marco de los  
28 estudios de Maestría en Ciencias Médicas, Vertiente Epidemiología Aplicada, que el Dr.  
29 Zuluaga adelanta con la Universidad Autónoma de Guerrero (México) y el CIET, siendo  
30 aceptada de manera preliminar, por lo que se envió carta al Dr. Neil Andersson manifestando  
31 nuestro acuerdo.  
32

#### 33 34 **4. Meta**

35  
36 Realizar un estudio epidemiológico para un programa de intervención en atención primaria de  
37 salud para la promoción y prevención de las enfermedades relacionadas con el ciclo  
38 reproductivo de las mujeres indígenas en comunidades de Asatrizy, Vaupés.  
39

#### 40 41 **5. Objetivos**

- 42 a. Fortalecer, recuperar y promover los conocimientos tradicionales y la cultura de las  
43 comunidades de Asatrizy.
- 44 b. Adelantar un estudio transversal con la participación de las mujeres pertenecientes a las  
45 siete comunidades de Asatrizy.
- 46 c. Estudiar la prevalencia de problemas de salud relacionados con el ciclo vital de la mujer.
- 47 d. Estudiar la frecuencia de prácticas tradicionales relacionadas con el cuidado de los  
48 ciclos vitales de la mujer.
- 49 e. Determinar las posibles asociaciones entre enfermedades propias de la mujer y la  
50 pérdida de las prácticas tradicionales y culturales de salud.
- 51 f. Divulgar los resultados del estudio a las mujeres participantes, miembros de las  
52 comunidades, líderes, agentes sanitarios y educativos y la Junta Directiva de Asatrizy.
- 53 g. A partir de los resultados, realizar un programa de intervención en autocuidado y  
54 atención primaria en salud para la promoción y prevención de enfermedades  
55 relacionadas con el ciclo vital de la mujer.  
56  
57  
58  
59  
60



- 1
  - 2
  - 3
  - 4
  - 5
  - 6
  - 7
  - 8
  - 9
  - 10
  - 11
  - 12
  - 13
  - 14
  - 15
  - 16
  - 17
  - 18
  - 19
  - 20
  - 21
  - 22
  - 23
  - 24
  - 25
  - 26
  - 27
  - 28
  - 29
  - 30
  - 31
  - 32
  - 33
  - 34
  - 35
  - 36
  - 37
  - 38
  - 39
  - 40
  - 41
  - 42
  - 43
  - 44
  - 45
  - 46
  - 47
  - 48
  - 49
  - 50
  - 51
  - 52
  - 53
  - 54
  - 55
  - 56
  - 57
  - 58
  - 59
  - 60
- h. A partir de los resultados, incluir un proceso de formación específica en salud tradicional en el proceso de educación propia que adelanta Asatrizy.
  - i. Compartir los resultados del estudio con las entidades de carácter municipal, departamental y nacional que tienen responsabilidad en los programas de salud, educación y desarrollo adelantados en las comunidades de Asatrizy, de manera que los programas tengan mayor sensibilidad cultural.

## 6. Principios

- a. El proyecto mejorará la capacidad y habilidades de miembros de la comunidad en investigación basada en la comunidad.
- b. Las comunidades se involucrarán como socios en todos los aspectos de la investigación, desde el diseño hasta la implementación.
- c. Se guardará el anonimato de los encuestados en todas las etapas y su identidad será protegida cuando los datos sean recogidos y los resultados presentados.
- d. Asatrizy retiene la propiedad de los datos y será la primera en recibir los resultados.
- e. Para proteger la identidad de los encuestados, el Gests guardará los datos en nombre de Asatrizy en un lugar seguro.
- f. Todos los datos serán recogidos y guardados según lo establecido en este convenio.
- g. Los datos de este proyecto sólo serán utilizados para alcanzar los objetivos y la meta establecida.

## 7. Responsabilidades

Las partes se comprometen a que el proyecto se desarrolle como sigue:

- a. Asatrizy supervisará el proyecto a través de la Junta Directiva y la Coordinadora de Mujeres.
- b. El Gests trabajará con un individuo identificado por Asatrizy para coordinar la comunicación entre las comunidades participantes.
- c. El Gests vinculará a investigadores de la comunidad seleccionados por Asatrizy para acompañar la investigación, recoger los datos e interpretar los resultados que han de compartir con sus comunidades.
- d. El Gests validará el instrumento de recolección con los investigadores seleccionados por Asatrizy, considerando los aspectos culturales, de traducción de lengua y de sensibilidad de género.
- e. El Gests financiará según necesidad la reunión de mujeres de las siete comunidades para la realización y retroalimentación del proyecto.
- f. Asatrizy acompañará, con por lo menos un representante, la gira para la realización de las encuestas y la recolección de todos los datos.
- g. El Gests presentará los resultados a Asatrizy de manera apropiada y útil, y responderá ante solicitudes adicionales de análisis.
- h. Los hallazgos serán presentados a los participantes de la comunidad y serán invitados a ofrecer retroalimentación/interpretación de los resultados. El Gests también asistirá en la presentación de los hallazgos a nivel comunitario, según solicitud.

## 8. Confidencialidad

Asatrizy y Gests se comprometen a salvaguardar la privacidad y seguridad de toda la información que contenga identificaciones personales y/o comunitarios. Se obtendrá consentimiento informado, culturalmente adecuado, según los requerimientos de la Junta

1 Directiva de Asatrizy, de la Unión de Mayores Kumuá Yoamará, de las mujeres encuestadas,  
2 previo a la recolección de la información personal.  
3

#### 4 9. Posterior divulgación

5  
6 Asatrizy y Gests no divulgarán la información recolectada para ningún otro propósito a menos  
7 que acuerden lo contrario las dos partes y lo autoricen por escrito.  
8

#### 9 10. Modificaciones de éste convenio

10 Las modificaciones a este convenio se harán por escrito y firmadas por las partes.  
11

12  
13 En constancia las partes suscriben el presente convenio, en dos ejemplares del mismo tenor y  
14 valor, a los 18 días del mes de mayo de 2008.  
15

16  
17 Grupo de Estudios en Sistemas Tradicionales de Salud de la facultad de medicina de la  
18 Universidad del Rosario  
19 Centro de Estudios Médicos Interculturales (CEMI)  
20  
21

22   
23 Germán Zuluaga R.  
24 Director General  
25 Investigador Principal  
26  
27

28 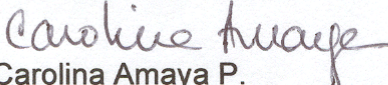  
29 Carolina Amaya P.  
30 Investigadora asociada  
31  
32

33 Asociación de Autoridades Tradicionales Indígenas de la Zona de Yapú, ASATRIZY  
34

35   
36 Efraín R. Mejía A.  
37 Presidente  
38

39   
40 Benjamín Jaramillo G.  
41 Secretario  
42  
43

44 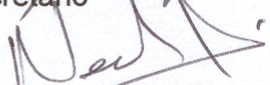  
45 Nelson C. Muñoz L.  
46 Coord. Plan de vida  
47  
48

49   
50 David Ramírez  
51 Suplente fiscal  
52  
53  
54  
55  
56  
57  
58  
59  
60

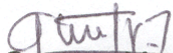  
Gustavo Vargas B.  
Vicepresidente

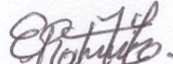  
Ramiro Ardila  
Fiscal

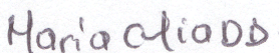  
María C. Duque  
Coord. Mujeres



**INITIATION RITES AT MENARCHE AND SELF REPORTED  
DYSMENORRHEA AMONG INDIGENOUS WOMEN OF THE  
COLOMBIAN AMAZON: A CROSS-SECTIONAL STUDY**

|                                 |                                                                                                                                                                                                 |
|---------------------------------|-------------------------------------------------------------------------------------------------------------------------------------------------------------------------------------------------|
| Journal:                        | <i>BMJ Open</i>                                                                                                                                                                                 |
| Manuscript ID:                  | bmjopen-2012-002012.R3                                                                                                                                                                          |
| Article Type:                   | Research                                                                                                                                                                                        |
| Date Submitted by the Author:   | 29-Dec-2012                                                                                                                                                                                     |
| Complete List of Authors:       | Zuluaga, German; Universidad del Rosario, Escuela de Medicina; Cemi, General Direction<br>Andersson, Neil; Universidad Autónoma de Guerrero, Centro de Investigación de Enfermedades Tropicales |
| <b>Primary Subject Heading</b>: | Epidemiology                                                                                                                                                                                    |
| Secondary Subject Heading:      | Public health, Sexual health, Obstetrics and gynaecology                                                                                                                                        |
| Keywords:                       | Intercultural , Dysmenorrhoea, Tradicional medicine, Initiation rites                                                                                                                           |
|                                 |                                                                                                                                                                                                 |

SCHOLARONE™  
Manuscripts

1  
2  
3  
4  
5 **INITIATION RITES AT MENARCHE AND SELF REPORTED DYSMENORRHEA AMONG**  
6 **INDIGENOUS WOMEN OF THE COLOMBIAN AMAZON: A CROSS-SECTIONAL STUDY**  
7  
8  
9

10 Germán Zuluaga, calle 12 no. 3A-21 (Cota – Colombia, SA), gzuluaga@cemi.org.co, 57  
11 3132625103 and 57 1 8777040.  
12  
13

14  
15  
16 Neil Andersson, Centro de Investigación de Enfermedades Tropicales (CIET), Universidad  
17 Autónoma de Guerrero, Calle Pino, El Roble, Acapulco México, andersson@ciet.org, 52 744  
18 488 0012 and 52 744 487 7230.  
19  
20

21 Germán Zuluaga, Escuela de Medicina y Ciencias de la Salud, Universidad del Rosario,  
22 Bogotá, Colombia.  
23  
24

25  
26 Neil Andersson, Universidad Autónoma de Guerrero, Centro de Investigación de  
27 Enfermedades Tropicales, Acapulco, México.  
28  
29

30  
31  
32 Keywords:

33 Intercultural

34  
35 Dysmenorrhoea

36  
37 Traditional medicine

38  
39 Initiation rites  
40  
41  
42

43  
44 Word count: 2440  
45  
46  
47  
48  
49  
50  
51  
52  
53  
54  
55  
56  
57  
58  
59  
60

## ABSTRACT

**Objectives:** Investigate the association between self reported dysmenorrhoea and patterns of female initiation rites at menarche among Amazonian indigenous peoples of Vaupés in Colombia.

**Design:** Cross-sectional study of all women in seven indigenous communities. Questionnaire administered in local language documented female initiation rites and experience of dysmenorrhoea. Analysis examined ten initiation components separately, then together, comparing women who underwent all rites, some rites and no rites.

**Settings:** Seven indigenous communities belonging to the Tukano language group in the Great Eastern Reservation of Vaupés (Colombia) in 2008.

**Participants:** All women over the age of 13 years living in the seven communities in Vaupés, who had experienced at least two menstruations (n=185), aged 13 to 88 years (mean 32,5; SD 15,6).

**Primary and secondary outcome measures:** The analysis rested on pelvic pain to define dysmenorrhoea as main outcome. Women were also asked about other disorders present during menstruation or the precedent days, and about the interval between menstruation and its duration.

**Results:** Only 17.3% (32/185) completed all initiation rites and 52.4% (97/185) reported dysmenorrhoea. Women not completing the rites were more likely to report dysmenorrhoea than those who did so (p=0.01 Fisher exact), taking into account age, education, community, parity, and use of family planning. Women who completed less than the full complement of rites had higher risk than those who completed all rites. Those who did not complete all rites reported increased severity of dysmenorrhoea (p=0.00014).

**Conclusions:** Our results are compatible with an association between traditional practices and women's health. We could exclude indirect associations with age, education, parity and use of family planning as explanations for the association. The study indicates feasibility, possible utility and limits of inter-cultural epidemiology in small groups.

## Article summary

### Article focus

- Female initiation rites and dysmenorrhoea.
- Epidemiology and cultural safety.

### Key messages

- There is an association between what women say about abandoning initiation rites and dysmenorrhoea.
- The study suggests an association between traditional practices and women's health.
- The study proposes the feasibility and usefulness of intercultural epidemiology.

### Strengths and limitations of this study

- There are no epidemiological studies of indigenous initiation and dysmenorrhoea.
- The small numbers problem is recognized, even with all eligible women participating.

## INTRODUCTION

The Tatujo, Bará, Carapana, Tuyuca y Tukano ethnicities in Tukano language group live between the Papurí and Yapú rivers in the Great Eastern Reservation of Vaupés.[1,2] In collective reservations, the seven communities with very similar customs in a subsistence economy. They share traditional rituals around childbirth, management of the umbilicus, rites of sexual début, marriage, pregnancy, menopause and death but, like many traditional cultures, they have abandoned much of this with urbanisation and globalisation of culture.[3]

Initiation rites at the onset of menarche last three to five days, involving a number of discrete activities: each initiate has a god-mother (*madrina*) and a mentor; she spends 3-5 days in isolation on a strict diet; she receives a blessing or prayer from the traditional healer; she applies powdered *carayurú*, a vegetable stain (*Arrhabidea chica*), to her skin; her hair is cut and her body painted with *we*, another vegetable stain (*Bignoniaceae sp.*); she inhales *ají*, a hot spice mix (*Capsicum spp.*); and undergoes water- or plant-precipitated emesis.

According to traditional wisdom, young women will be healthy if they complete initiation rites and follow traditional practices during menstruation. Young women in the region go to residential schools outside their communities. The school year follows a national standard,

1  
2  
3  
4  
5 making it difficult for schoolgirls to participate in traditional rites.[4] This loss of culture is a  
6 concern for Amazon indigenous communities, where every year people have less to do with  
7 traditional medical practices.[5] We were unable to confirm a decline or otherwise of initiation  
8 rituals from published sources in Colombia. Our research began with the express concern of  
9 community elders who, in the course of a decade long partnership with the traditional health  
10 systems group at Universidad del Rosario in Colombia, asked if loss of their cultural  
11 practices could affect women's reproductive health, particularly dysmenorrhoea.  
12  
13  
14  
15

16 Cultural adaptation is less common in epidemiology than it is in some qualitative approaches,  
17 [6] yet intercultural epidemiology can be useful to identify potential health benefits of  
18 traditional health practices, many of which are being lost as globalization erodes indigenous  
19 cultures.  
20  
21

22 Problems related to women's reproductive cycle are increasing worldwide.[7-9] Western  
23 medicine has few satisfactory solutions to offer women with dysmenorrhoea, offering an  
24 interesting case in point as the World Health Organization calls to explore possible  
25 contributions of traditional medicine.[10,11] A sparse epidemiological literature addresses the  
26 links with dysmenorrhoea and cultural influences,[12, 13] ethnicity and religiosity.[14, 15]  
27 Better documented risk factors are diet, exercise, psychological or emotional episodes, and  
28 use of alcohol and tobacco.[16-20] We found no epidemiological studies of indigenous  
29 initiation rites and dysmenorrhoea. A retrospective survey using a questionnaire evaluated  
30 this possible association.  
31  
32  
33  
34  
35  
36

## 37 METHODS

38 **Study population:** All women over the age of 13 years living in the seven communities in  
39 Vaupés, who had experienced at least two menstruations (n=185), aged 13 to 88 years  
40 (mean 32,5; SD 15,6).  
41  
42  
43

44 **Outcome:** Interviewers asked if, during menstruation, women suffered pelvic pain, dizziness,  
45 headache, bodily pains, and problems in the days prior to menstruation. They did not specify  
46 a period of recall or a frequency of problems. They also asked about the interval between  
47 menstruation and duration of menstruation. The analysis rested on pelvic pain to define  
48 dysmenorrhoea.[21-23] The interviewer asked directly about pain and its severity, without  
49 asking about duration of pain, proportion of menstruations affected or activities that could not  
50 be completed due to the pain. Because pain perception is subjective, we used a well-  
51 established graphic approach showing faces with different grades of discomfort (Figure  
52  
53  
54  
55  
56  
57  
58  
59  
60

1  
2  
3  
4  
5 1).[24] Respondents simply pointed to the face that reflected their experience during  
6 menstruation.  
7

8 **Exposure:** Initiation rites at the onset of menarche, lasting three to five days, during which  
9 time the young women reported one, several or all component rites: emesis, care during the  
10 ceremony, *carayurú* powder, isolation, prescribed diet, body paint with *we*, godmother, cut  
11 hair, inhaled *aji*, and blessed by traditional healer. The questionnaire documented exposure  
12 to each component rite (yes/no) separately. Without understanding the exact workings of the  
13 initiation rites, we followed the WHO guideline to handle component activities as a “black  
14 box”[25]: we do not always have to understand exactly how a traditional therapy works to  
15 measure its effect. We thus documented each of the individual rites.  
16  
17  
18  
19

20  
21 **Instrument:** A month of consultation with local healers (*payés*) clarified the main research  
22 question and a list of culturally appropriate questions. After approval of the questionnaire for  
23 semantic and cultural equivalence with the *payés*, the researchers piloted the questionnaire  
24 and pain images with 14 women of the same ethnic group living in Mitu (not part of the  
25 study), they reported pain using the graphic approach showing faces with different grades of  
26 discomfort. The authorities in each community invited all women – by cultural definition, the  
27 first menstruation identifies the woman as an adult -- to the communal hall (*maloka*) where  
28 the researchers explained the instrument, issues of confidentiality and the right to decline to  
29 participate or to leave out any question. No eligible woman declined to participate.  
30 Interviewers administered a 37-question instrument through a translator during December  
31 2008.  
32  
33  
34  
35  
36  
37

38 **Analysis:** Epi-data 3.1 served for manual data capture analysis relied on CIETmap 2.0 beta  
39 8 (Centro de Investigación de Enfermedades Tropicales, Mexico), public domain software  
40 that provides a Windows-like interface with R. Bivariate analysis with each of the 10  
41 component activities examined the relationship of each component rite on its own with  
42 dysmenorrhoea. We also analysed complete and incomplete initiation using sequential  
43 stratification by age of the woman, community of origin (some had more access to Western  
44 ways), education, parity, family planning and menopause. We analysed trend using the  
45 Mantel extension of the Mantel-Haenszel test.[26] We report results as adjusted odds ratios  
46 (aOR) with 95% confidence intervals. The two-tailed Fisher exact test served for estimation  
47 of confidence with the resulting sparse numbers comparisons.  
48  
49  
50  
51  
52

53  
54 Without any prior basis for weighting importance of different activities in the initiation, we  
55 calculated the average effect across the ten components as though each was a separate  
56  
57  
58  
59  
60



exposure; this relied on Meta, an R program. A Forest plot summarises this (Figure 2). Compared with occurrence among women who completed all ten rites of initiation, a sensitivity analysis dropped each initiation rite in turn to test relevance of each in initiation.

**Control of biases:** Involvement of healers and elders in the design guaranteed cultural fit. The questionnaire inquired for current family planning, and if so, which is the method used (plants, pill, injection, condom, pessary, surgery, partner-managed contraception), and duration of use of each method, as this could affect dysmenorrhoea; hormonal pills can diminish pain and IUDs can increase pain. Use of Western contraceptive methods also coincides with Western acculturation. We stratified by contraceptive use to separate between the effect of the contraceptive and the initiation rites. To avoid an acculturation bias from interviewing only women who did not go to nearby towns for work, we conducted the study in December when most return to their homes. We took age, menopause and education into account by stratification to limit the differential influence of these on responses.

**Ethical aspects:** The CIET ethical review committee at the Universidad Autónoma de Guerrero and Research Fund at the Universidad del Rosario in Colombia both approved the proposal. The leadership of each community signed formal agreements for data management and sharing with all participants present, after the researchers had explained to all the nature of the study, how data would be used, confidentiality, and rights to decline participation.[27]

## RESULTS

A total of 185 women participated, representing 70.6% of the 262 women over the age of 12 years identified in the 2006 census. The 77 women excluded had either migrated from the area or they had not completed two menstruations. Of 158 women who knew their age in years, the average was 32.5 years (mode 19 years, SD 15.6). Respondents reported low levels of education, 28.3% (52/184) with no schooling and only 17.4% (32/184 women interviewed) with secondary education. Few used family planning (11.1% based on 15/135 women of reproductive age) with an average of 4.9 children each (SD 2.7).

Table 1: Characteristics of the women included in the sample

| Variable        | Yes |      | No  |        | Total |
|-----------------|-----|------|-----|--------|-------|
| Mixed ethnicity | 0   | 0.0% | 185 | 100.0% | 185   |

|                                    |     |       |     |       |     |
|------------------------------------|-----|-------|-----|-------|-----|
| Born in this community             | 94  | 51.4% | 89  | 48.6% | 183 |
| Knew her age                       | 158 | 85.4% | 27  | 14.6% | 185 |
| Menopausal                         | 50  | 27.0% | 135 | 73.0% | 185 |
| Had had children                   | 139 | 75.1% | 46  | 24.9% | 185 |
| Using contraceptive methods        | 15  | 11.1% | 120 | 88.9% | 135 |
| Using contraceptive pills          | 0   | 0.0%  | -   | -     | -   |
| Using IUDs                         | 2   | 13.3% | -   | -     | -   |
| Using plants                       | 1   | 6.7%  | -   | -     | -   |
| Tubal ligation                     | 4   | 26.7% | -   | -     | -   |
| Using other methods                | 8   | 53.3% | -   | -     | -   |
| Any education level                | 133 | 71.9% | 52  | 28.1% | 185 |
| Lives in a community with airstrip | 118 | 65.2% | 63  | 34.8% | 181 |
| Reported dysmenorrhea              | 97  | 52.4% | 88  | 47.6% | 185 |
| Rites completion                   |     |       |     |       |     |
| All rites completed                | 32  | 17.3% | 153 | 82.7% | 185 |
| No rites at all                    | 14  | 7.6%  | 171 | 92.4% | 185 |
| Incomplete rite                    | 139 | 75.1% | 46  | 24.9% | 185 |

The average age of menarche was 13.8 years (SD 1.16). Some 52% (97/185) reported dysmenorrhoea and 88.6% (164/185) reported undergoing at least some rite of initiation during menarche. Table 2 shows the proportion involved in each of ten activities identified by traditional healers as the initiation rites. Considering each rite separately, only emesis retained a significant association on its own with dysmenorrhoea, after taking into account age of the woman, community of origin (some had more access to Western ways), parity, family planning by sequential stratification and adjusting for menopause and education. The Forest plot (Figure 2) shows dysmenorrhoea associated with each component rite compared with women who did no rites. The average effect size was OR 1.66 (95%CI 1.35-2.04).

Table 2: Exposure to different aspects of initiation rite and risk of dysmenorrhoea (odds ratio)

| Initiation rite                | % of all women receiving this rite** | Risk of dysmenorrhoea in each subgroup |                    |       |        |      |
|--------------------------------|--------------------------------------|----------------------------------------|--------------------|-------|--------|------|
|                                |                                      | Receiving rite                         | Not receiving rite | aOR*  | 95% CI |      |
| Emesis                         | 38.4%                                | 27/71                                  | 70/114             | 0.39* | 0.21   | 0.7  |
| Cared for during the ceremony  | 76.8%                                | 69/142                                 | 28/43              | 0.51  | 0.25   | 1.02 |
| Applied <i>carayurú</i> powder | 84.3%                                | 78/156                                 | 19/29              | 0.53  | 0.23   | 1.19 |
| Spent time in isolation        | 71.9%                                | 64/133                                 | 33/52              | 0.53  | 0.28   | 1.03 |
| Followed prescribed diet       | 71.9%                                | 64/133                                 | 33/52              | 0.53  | 0.28   | 1.03 |
| Body painted with <i>we</i>    | 50.8%                                | 44/94                                  | 53/91              | 0.63  | 0.35   | 1.12 |
| Had a godmother                | 50.8%                                | 45/94                                  | 50/88              | 0.7   | 0.39   | 1.25 |
| Cut hair                       | 68.6%                                | 64/127                                 | 33/58              | 0.77  | 0.41   | 1.45 |
| Inhaled <i>aji</i>             | 49.2%                                | 45/91                                  | 52/94              | 0.79  | 0.44   | 1.41 |
| Blessed by traditional healer  | 88.6%                                | 85/164                                 | 12/21              | 0.81  | 0.32   | 2.04 |

\* Adjusted for age and level of education in a stratified analysis.

\*\* Total 185 women; no missing data

To test the role of each rite in relation to dysmenorrhoea, a sensitivity analysis compared dysmenorrhoea rates among women who did all ten rites (n=32) with women who participated in less than the ten, dropping each rite in turn. Figure 3 shows the unadjusted odds of dysmenorrhoea for all rites compared with failing to do specific rites, and those who did no rites. Those who completed the 10 rites (8/32) contrasted sharply with those who completed some or no rites (89/153) (p-Fisher 0.001).

Table 3: Sensitivity analysis of initiation rites and dysmenorrhoea contrasting women who completed all rites and those who completed only one component rite.

|                                | n   | Frequencies |      |         |      |        | Risk of dysmenorrhoea |            |       |
|--------------------------------|-----|-------------|------|---------|------|--------|-----------------------|------------|-------|
|                                |     | No          | Yes  | p-value | OR   | 95% CI | p-Fisher              |            |       |
| None                           | 46  | 14          | 30,4 | 32      | 69,6 | 0.001  | 7,5                   | 1,95-28,7  | 0.001 |
| Emesis                         | 71  | 39          | 54,9 | 32      | 45,1 | 0.001  | 2,85                  | 1,04-7,82  | 0.050 |
| Cared for during the ceremony  | 142 | 110         | 77,5 | 32      | 22,5 | 0.001  | 3,73                  | 1,59-8,78  | 0.001 |
| Followed prescribed diet       | 133 | 101         | 75,9 | 32      | 24,1 | 0.001  | 3,73                  | 1,58-8,85  | 0.001 |
| Spent time in isolation        | 133 | 101         | 75,9 | 32      | 24,1 | 0.001  | 3,73                  | 1,58-8,85  | 0.001 |
| Applied <i>carayurú</i> powder | 156 | 124         | 79,5 | 32      | 20,5 | 0.001  | 3,89                  | 1,68-9,02  | 0.001 |
| Blessed by traditional healer  | 164 | 132         | 80,5 | 32      | 19,5 | 0.001  | 4,20                  | 1,83-9,66  | 0.001 |
| Body painted with <i>we</i>    | 94  | 62          | 66,0 | 32      | 34,0 | 0.001  | 4,15                  | 1,65-10,4  | 0.001 |
| Cut hair                       | 127 | 95          | 74,8 | 32      | 25,8 | 0.001  | 4,31                  | 1,81-10,2  | 0.001 |
| Had a godmother                | 94  | 62          | 66,0 | 32      | 34,0 | 0.001  | 4,44                  | 1,77-11,1  | 0.001 |
| Inhaled <i>aji</i>             | 91  | 59          | 64,8 | 32      | 35,2 | 0.001  | 5,05                  | 1,99-12,77 | 0.001 |

Most respondents with dysmenorrhoea (92/97) reported severity using the Wong-Baker Faces Pain Rating Scale. Table 4 shows a statistically significant increase across five levels of severity for those who completed all rites compared with those who did any or no rites ( $p=0.0014$ ). It also contrasts those who did no rites with those who completed all rites ( $p=0.0039$ ).

Table 4: Completion of initiation rites and reported intensity of dysmenorrhoea

|                               | No dysmenorrhoea | Intensity of dysmenorrhoea                                |              |              |              |
|-------------------------------|------------------|-----------------------------------------------------------|--------------|--------------|--------------|
|                               | 0                | 1                                                         | 2            | 3            | 4 y 5        |
| <b>Incomplete or no rites</b> | 64               | 18                                                        | 20           | 19           | 27           |
| <b>All rites completed</b>    | 24               | 2                                                         | 4            | 1            | 1            |
| <b>Total</b>                  | 88               | 20                                                        | 24           | 20           | 28           |
| <b>OR</b>                     |                  | 3.94                                                      | 3.49         | 6.76         | 6.92         |
| <b>95%CI</b>                  |                  | 1.72 - 9.00                                               | 1.41 - 8.64  | 1.84 - 24.93 | 1.17 - 40.88 |
|                               |                  | Mantel-Haenszel chi square for trend = 10.16 $p = 0.0014$ |              |              |              |
| <b>No rites at all</b>        | 4                | 1                                                         | 3            | 3            | 2            |
| <b>All rites completed</b>    | 24               | 2                                                         | 4            | 1            | 1            |
| <b>Total</b>                  | 28               | 3                                                         | 7            | 4            | 3            |
| <b>OR</b>                     |                  | 6.75                                                      | 6.93         | 9.38         | 5.64         |
| <b>IC 95%</b>                 |                  | 1.72 - 26.42                                              | 1.77 - 27.17 | 1.82 - 48.41 | 0.57 - 55.87 |
| <b>P-Fisher</b>               |                  | 0.01                                                      | 0.01         | 0.02         | 0.2          |
|                               |                  | Mantel-Haenszel chi square for trend = 8.33; $p = 0.0039$ |              |              |              |

## DISCUSSION

Our results show that women who reported having no initiation rite were more likely to report dysmenorrhoea than women who said they had such a rite. Emesis was the single strongest protective rite on its own, but sensitivity analysis showed a consistent effect of the other rites for those who did not abandon the initiation practices. The apparent lack of specific effects of each component rite supports the idea that synergy between all components completes the

1  
2  
3  
4  
5 protective effect.

6  
7 The average age of menarche of our sample was higher than typically reported in the  
8 literature,[28-33] possibly indicating a relatively low level of secular change.[34,35] That one  
9 half of the women reported dysmenorrhoea (97/185) is lower than reported in international  
10 studies.[36-40] Although the local definition (facial expressions) was useful for internal  
11 comparisons, it is of limited value in international comparisons.

12  
13 This study faced several common challenges in inter-cultural epidemiology. Even with all  
14 eligible women participating, the small numbers problem is well recognised and has no easy  
15 solution.[41,42] As anticipated, we found it difficult to untangle issues like use of  
16 contraceptives and reporting of age, given the effect of acculturation on these. Despite this  
17 interdependence of exposures, we believe we were able to show an independent effect of  
18 initiation rites.

19  
20 Cultural issues probably reduced the effectiveness of the study and reduced the numbers  
21 further. The 14.6% (27/185) of women who could not give their age in calendar years is  
22 testimony to their distance from Western culture. Analysing only those who mention an age  
23 included a cultural filter, limiting our conclusions to those with some measure of Western  
24 acculturation. Recall bias might have affected the results as some women had to remember  
25 rites that took place decades earlier; a social desirability bias (not wanting to be culturally  
26 different, wanting to avoid disapproval) might also have influenced the results. We have no  
27 additional information to clarify the directions of these biases.

28  
29 Within these constraints and the stringent limits imposed by our population size, we tried to  
30 take account of other acculturation issues, beyond initiation rites, by stratifying for education,  
31 age, parity, community of residence (some had greater access to modern towns) and use of  
32 family planning. The lower risk associated with initiation rites might still be due to  
33 unmeasured lifestyle issues associated with maintaining initiation rites. Solving this issue  
34 may require a randomised controlled trial where the differential support for the fulfilment of  
35 the rite among communities be contrasted with the occurrence of dysmenorrhoea. One  
36 problem with prospective studies in this setting is that it would take many years to  
37 accumulate the numbers necessary to make the case.

38  
39 Since the 1950s, public health programmes have contemplated primary, secondary and  
40 tertiary prevention. More recently, *primordial prevention* identified social, economic and  
41 cultural patterns that affect risks.[43] Within its limitations, our study is compatible with the  
42  
43  
44  
45  
46  
47  
48  
49  
50  
51  
52  
53  
54  
55  
56  
57  
58  
59  
60

1  
2  
3  
4  
5 idea that primary or primordial prevention of dysmenorrhoea might be possible for indigenous  
6 women who are increasingly in contact with Western ways.  
7

## 8 **CONCLUSIONS**

9  
10 Without adding insight into exact mechanisms, this cross-sectional study shows an  
11 association between abandoning initiation rites and dysmenorrhoea. No one of the rites on  
12 its own explains this association.  
13  
14

15 Inter-cultural approaches have received little attention in the epidemiological literature, and  
16 these need further investment. In this study, the indigenous leaders of the seven  
17 communities requested the study and set the research question; they specified the cultural  
18 exposures of interest; they participated in the design and testing of instruments; they led  
19 interpretation of results; and they are the primary research users, sharing the results with  
20 their communities in support of traditional health practices.  
21  
22

23 Without underestimating the remaining intercultural challenges, the difficulties of research in  
24 small populations and the limits of observational studies, we feel this study achieves a first  
25 step in culturally safe descriptive epidemiology of traditional medicine: a longer term dialogue  
26 led to the research question and design; the indigenous leaders defined the exposure of  
27 interest; the ethical review process fitted with indigenous ethical concepts; it showed an  
28 association between self reported participation in initiation rites and dysmenorrhea.  
29  
30  
31  
32  
33  
34  
35  
36  
37  
38  
39  
40  
41  
42  
43  
44  
45  
46  
47  
48  
49  
50  
51  
52  
53  
54  
55  
56  
57  
58  
59  
60

## ACKNOWLEDGMENTS

Field work was financed by The Research Fund of Universidad del Rosario. Benedicto Mejía and Efraín Mejía, along with other *payés* (wise men, healers) from the seven communities participated in formulation of research questions, design, application of the instrument and interpretation of results. Alicia Jaramillo and Guillermina Ferrer translated the questions during the application of the instrument. Carolina Amaya and Natalia Reinoso carried out the pilot study and the research instrument application in the seven communities. Iván Sarmiento helped with data analysis, tables and figures elaboration and revision of citations and bibliographic references. Andrés Cañón and Sebastián Luna collaborated with the systematic review of cultural risk factors for dysmenorrhea.

## COMPETING INTERESTS

We, the authors, declare that there are no conflicts of interest in this study regarding the Indigenous communities that took part, the recognised rights of the Indigenous Peoples, or the financing institutions.

## FUNDING

Fieldwork was financed by The Research Fund of Universidad del Rosario. Germán Zuluaga, MD, MSc carried out the research project as part fulfilment of the requirements of MSc (Epidemiology) at the Universidad Autónoma de Guerrero.

## FIGURE LEGENDS

Figure 1: Wong-Baker Faces Pain Rating Scale

Figure 2: Forest plot of individual initiation rites and risk of dysmenorrhoea

Figure 3: Sensitivity analysis compared dysmenorrhoea risk among women who did all ten rites (n=32) compared with women who did not do at least one rite, and those who did no rite (listing shows excluded rites)

## REFERENCES

---

1. Dirección de Etnias del Ministerio del Interior y de Justicia. *Resolución no. 0006 de 26 de enero de 2005, por medio de la cual se inscribe en el registro de asociaciones de autoridades tradicionales y/o cabildos la constitución de la asociación de autoridades tradicionales indígenas de la zona de Yapú - ASATRIZY*. Bogotá (CO): Min. Int. Just, 2005.
2. Sarmiento I, Amaya C. *Plan de vida: unidos con un solo pensamiento para vivir bien*. Asociación de Autoridades Tradicionales Indígenas de la Zona de Yapú. Bogota, Colombia 2008.
3. Sarmiento I, Amaya C. Asociación de Autoridades Tradicionales Indígenas de la Zona de Yapú. *Historia y origen del proceso de un Nuevo despertar*. Bogotá, Colombia, 2008.
4. Rembeck GI, Gunnarsson RK. Improving pre- and postmenarcheal 12-year-old girls' attitudes toward menstruation. *Health Care Women Int*. 2004;**25**:680-98.
5. Piñeros-Petersen M, Ruiz-Salguero M. Aspectos demográficos en comunidades indígenas de tres regiones de Colombia. *Salud Pública Mex* 1998;**40**:324-329.
6. Cameron M, Andersson N, and Ledogar RJ. Culturally safe epidemiology: oxymoron or scientific imperative. *Pimatisiwin: Journal of Aboriginal and Indigenous Community Health* 2010;**8**(2):89-116.
7. World Health Organization. *Engaging for Health. □ 11th General Program of Work 2006-2015, a Global Health Agenda*. Geneva (CH): WHO, 2006. (Working paper GPW/2006-2015). Available at: [http://whqlibdoc.who.int/publications/2006/GPW\\_eng.pdf](http://whqlibdoc.who.int/publications/2006/GPW_eng.pdf). Accessed October 15, 2008.
8. Rodríguez J. *Descripción de la mortalidad por departamentos: Colombia año 2000*. Bogotá (CO): Pontificia Universidad Javeriana, Cendex. (Working Paper ASS /DT 016-05). Available at: <http://www.cendex.org.co/pdf/DT016-05.pdf>. Accessed January 15, 2008.
9. García-Pérez H, Harlow SD, Erdmann CA, et al. Pelvic pain and associated characteristics among women in northern Mexico. *Int Perspect Sex Reprod Health*. 2010;**36**:90-8.
10. World Health Organization. *Traditional Medicine and Health Coverage*. Geneva: WHO, 1983.



- 1  
2  
3  
4  
5  
6  
7  
8  
9  
10  
11  
12  
13  
14  
15  
16  
17  
18  
19  
20  
21  
22  
23  
24  
25  
26  
27  
28  
29  
30  
31  
32  
33  
34  
35  
36  
37  
38  
39  
40  
41  
42  
43  
44  
45  
46  
47  
48  
49  
50  
51  
52  
53  
54  
55  
56  
57  
58  
59  
60
11. World Health Organization. *WHO Traditional Medicine Strategy: 2002-2005*. Geneva, (CH): WHO, 2002.
12. Garg S, Sharma N, Sahay R. Socio-cultural aspects of menstruation in an urban slum in Delhi, India. *Reprod Health Matters* 2001;**9**:16-25.
13. Avasarala AK, Panchangam S. Dysmenorrhoea in different settings: are the rural and urban adolescent girls perceiving and managing the dysmenorrhoea problem differently? *Indian J Community Med* 2008;**33**:246-249.
14. Goldstein-Ferber S, Granot M. The association between somatization and perceived ability: roles in dysmenorrhea among israeli arab adolescents. *Psychosom Med* 2006;**68**:136-142.
15. Marván ML, Vacio A, García-Yañez G, *et al*. Attitudes toward menarche among Mexican pre-adolescents. *Women Health* 2007;**46**:7-23.
16. Latthe P, Mignini L, Gray R, *et al*. Factors predisposing women to chronic pelvic pain: systematic review. *BMJ* 2006;**332**:749-755.
17. Patel A, Tanksale V, Sahasrabhojane M, *et al*. The burden and determinants of dysmenorrhoea: a population-based survey of 2262 women in Goa, India. *BJOG* 2006;**113**:453-463.
18. Balbi C, Musone R, Menditto A, *et al*. Influence of menstrual factors and dietary habits on menstrual pain in adolescence age. *Eur J Obstet Gynecol Reprod Biol* 2000;**91**:143-148.
19. Proctor ML, Murphy PA. Herbal and dietary therapies for primary and secondary dysmenorrhoea. *Cochrane Database Syst Rev* 2001;**(3)**:CD002124.
20. Parazzini F, Tozzi L, Mezzopane R, *et al*. Cigarette smoking, alcohol consumption, and risk of primary dysmenorrhea. *Epidemiology* 1994;**5**:469-472.
21. Mazza D. *Women's Health in General Practice*. Oxford: Butterworth Heinemann, 2004.
22. Deb Sh, Raine-Fenning N. Dysmenorrhoea. *Obstetrics, Gynaecology and Reproductive Medicine* 2008;**18**:294-299.
23. Dawood MY. Primary dysmenorrhoea: advances in pathogenesis and management. *Obstet Gynecol* 2006;**108**:428-441.

- 1  
2  
3  
4  
5 24. Wong D, Whaley L. *Clinical handbook of pediatric nursing*. 2nd ed. Saint Louis (MO):  
6 Mosby Company, 1986. Quoted by: National Institutes of Health, NIH Pain Consortium. Pain  
7 intensity scales – Wong-Baker faces pain rating scale [NIH Pain Consortium Web site]. July  
8 17, 2007. [http://painconsortium.nih.gov/pain\\_scales/Wong-Baker\\_Faces.pdf](http://painconsortium.nih.gov/pain_scales/Wong-Baker_Faces.pdf) (accessed 24  
9 April 2012).  
10  
11  
12  
13 25. World Health Organization. *General Guidelines for Methodologies on Research and*  
14 *Evaluation of Traditional Medicine*. Geneva (CH): WHO, 2000. (Working paper  
15 WHO/EDM/TRM/2000.1)  
16  
17  
18 26. Leuraud K, Benichou J: Tests for monotonic trend from case control data: Cochran-  
19 Armitage-Mantel trend test, isotonic regression and single and multiple contrast tests.  
20 *Biometrical Journal* 2004;46:731-749  
21  
22  
23 27. Grupo de Estudios en Sistemas Tradicionales de Salud. Principios éticos para estudios  
24 médicos aplicados a los sistemas tradicionales de salud 2008.  
25 [http://www.cemi.org.co/images/PRINCIPIOS\\_ETICOS\\_GESTS\\_CEMI.pdf](http://www.cemi.org.co/images/PRINCIPIOS_ETICOS_GESTS_CEMI.pdf) (accessed 14 Jun  
26 2010).  
27  
28  
29  
30 28. Vera Y, Hidalgo G, Gollo O, *et al*. Edad de la menarquia y su relación con el estrato social  
31 en cinco estados venezolanos. *Acta Cient Estud* 2009;7:130-135.  
32  
33  
34 29. Ulate G. Edad de la menarquia en el Valle Central de Costa Rica y factores asociados a  
35 su aparición. *Rev Costarric Cienc Med* 1995;16:37-41.  
36  
37  
38 30. Fonseca J, Aguilar O. Edad de la Menarquia en San Pedro Sula. *Rev Med Hondur*  
39 1991;59: 4-7.  
40  
41  
42 31. Hernández I, Unanue N, Gaete X, *et al*. Edad de la menarquia y su relación con el nivel  
43 socioeconómico e índice de masa corporal. *Rev Med Chil* 2007;135:1429-1436.  
44  
45  
46 32. Sharma N, Vaid S, Manhas A. Age at menarche in two caste groups (brahmins and  
47 rajputs) from rural areas of Jammu. *Anthropologist* 2006;8:55-7.  
48  
49  
50 33. Romans SE, Martin JM, Gendall K, *et al*. Age of menarche: the role of some psychosocial  
51 factors. *Psychol Med* 2003;33:933–939.  
52  
53 34. Padez C. Social background and age at menarche in portuguese university students: a  
54 note on the secular changes in Portugal. *Am J Hum Biol* 2003;15:415-427.  
55  
56  
57  
58  
59  
60

- 1  
2  
3  
4  
5 35. Tanner JM. *Growth at Adolescence*. 2nd ed. Oxford: Blackwell, 1962. Quoted by: Korah  
6 L. Knowledge and perceptions regarding menstruation among adolescent girls: a research  
7 study. *Nurs J India* 1991;**82**:205-209.  
8  
9  
10 36. Woods NF, Most A, Dery GK. Prevalence of perimenstrual symptoms. *Am J Public Health*  
11 1982;**72**:1257-1264.  
12  
13 37. Klein JR, Litt IF. Epidemiology of adolescent dysmenorrhea. *Pediatrics* 1981;**68**:661-664.  
14  
15 38. Wilson CA, Keye WRJ. A survey of adolescent dysmenorrhea and premenstrual  
16 symptom frequency, a model program for prevention, detection, and treatment. *J Adolesc*  
17 *Health Care*. 1989;**10**:317-322.  
18  
19 39. Jamieson D, Steege J. Prevalence of dysmenorrhoea, dyspareunia, pelvic pain and  
20 irritable bowle syndrome in primary care practices. *Obstet Gynecol* 1996;**87**:55-58.  
21  
22 40. Latthe P, Latthe M, Say L, *et al*. WHO systematic review of prevalence of chronic pelvic  
23 pain: a neglected reproductive health morbidity. *BMC Public Health* 2006;**6**:177.  
24  
25 41. Andresen EM, Diehr PH, Luke DA. Public health surveillance of low-frequency  
26 populations. *Annu Rev Public Health* 2004;**25**:25-52.  
27  
28 42. Monasta L, Andersson N, Ledogar RJ, *et al*. Minority health and small numbers  
29 epidemiology: a case study of living conditions and health of children in five foreign Roma  
30 camps in Italy. *Am J Public Health* 2008;**98**:2035-2041.  
31  
32 43. Bonita R, Beaglehole R, Kjellström T, Basic Epidemiology, Second Edition World Health  
33 Organization, Geneva 2006 p103  
34  
35  
36  
37  
38  
39  
40  
41  
42  
43  
44  
45  
46  
47  
48  
49  
50  
51  
52  
53  
54  
55  
56  
57  
58  
59  
60

1  
2  
3  
4  
5  
6  
7  
8  
9  
10  
11  
12  
13  
14  
15  
16  
17  
18  
19  
20  
21  
22  
23  
24  
25  
26  
27  
28  
29  
30  
31  
32  
33  
34  
35  
36  
37  
38  
39  
40  
41  
42  
43  
44  
45  
46  
47  
48  
49  
50  
51  
52  
53  
54  
55  
56  
57  
58  
59  
60

**INITIATION RITES AT MENARCHE AND SELF REPORTED DYSMENORRHEA AMONG  
INDIGENOUS WOMEN OF THE COLOMBIAN AMAZON: A CROSS-SECTIONAL STUDY**

Germán Zuluaga, calle 12 no. 3A-21 (Cota – Colombia, SA), gzuluaga@cemi.org.co, 57  
3132625103 and 57 1 8777040.

Neil Andersson, Centro de Investigación de Enfermedades Tropicales (CIET), Universidad  
Autónoma de Guerrero, Calle Pino, El Roble, Acapulco México, andersson@ciet.org, 52 744  
488 0012 and 52 744 487 7230.

Germán Zuluaga, Escuela de Medicina y Ciencias de la Salud, Universidad del Rosario,  
Bogotá, Colombia.

Neil Andersson, Universidad Autónoma de Guerrero, Centro de Investigación de  
Enfermedades Tropicales, Acapulco, México.

Keywords:

Intercultural

Dysmenorrhoea

Traditional medicine

Initiation rites

Word count: 2440

## ABSTRACT

**Objectives:** Investigate the association between self reported dysmenorrhoea and patterns of female initiation rites at menarche among Amazonian indigenous peoples of Vaupés in Colombia.

**Design:** Cross-sectional study of all women in seven indigenous communities. Questionnaire administered in local language documented female initiation rites and experience of dysmenorrhoea. Analysis examined ten initiation components separately, then together, comparing women who underwent all rites, some rites and no rites.

**Settings:** Seven indigenous communities belonging to the Tukano language group in the Great Eastern Reservation of Vaupés (Colombia) in 2008.

**Participants:** All women over the age of 13 years living in the seven communities in Vaupés, who had experienced at least two menstruations (n=185), aged 13 to 88 years (mean 32,5; SD 15,6).

**Primary and secondary outcome measures:** The analysis rested on pelvic pain to define dysmenorrhoea as main outcome. Women were also asked about other disorders present during menstruation or the precedent days, and about the interval between menstruation and its duration.

**Results:** Only 17.3% (32/185) completed all initiation rites and 52.4% (97/185) reported dysmenorrhoea. Women not completing the rites were more likely to report dysmenorrhoea than those who did so (p=0.01 Fisher exact), taking into account age, education, community, parity, and use of family planning. Women who completed less than the full complement of rites had higher risk than those who completed all rites. Those who did not complete all rites reported increased severity of dysmenorrhoea (p=0.00014).

**Conclusions:** Our results are compatible with an association between traditional practices and women's health. We could exclude indirect associations with age, education, parity and use of family planning as explanations for the association. The study indicates feasibility, possible utility and limits of inter-cultural epidemiology in small groups.

## Article summary

### Article focus

- Female initiation rites and dysmenorrhoea.
- Epidemiology and cultural safety.

### Key messages

- There is an association between what women say about abandoning initiation rites and dysmenorrhoea.
- The study suggests an association between traditional practices and women's health.
- The study proposes the feasibility and usefulness of intercultural epidemiology.

### Strengths and limitations of this study

- There are no epidemiological studies of indigenous initiation and dysmenorrhoea.
- The small numbers problem is recognized, even with all eligible women participating.

## INTRODUCTION

The Tatuyo, Bará, Carapana, Tuyuca y Tukano ethnicities in Tukano language group live between the Papurí and Yapú rivers in the Great Eastern Reservation of Vaupés.[1,2] In collective reservations, the seven communities with very similar customs in a subsistence economy. They share traditional rituals around childbirth, management of the umbilicus, rites of sexual début, marriage, pregnancy, menopause and death but, like many traditional cultures, they have abandoned much of this with urbanisation and globalisation of culture.[3]

Initiation rites at the onset of menarche last three to five days, involving a number of discrete activities: each initiate has a god-mother (*madrina*) and a mentor; she spends 3-5 days in isolation on a strict diet; she receives a blessing or prayer from the traditional healer; she applies powdered *carayurú*, a vegetable stain (*Arrhabidea chica*), to her skin; her hair is cut and her body painted with *we*, another vegetable stain (*Bignoniaceae sp.*); she inhales *ají*, a hot spice mix (*Capsicum spp.*); and undergoes water- or plant-precipitated emesis.

According to traditional wisdom, young women will be healthy if they complete initiation rites and follow traditional practices during menstruation. Young women in the region go to residential schools outside their communities. The school year follows a national standard,

1  
2  
3  
4  
5  
6  
7  
8 making it difficult for schoolgirls to participate in traditional rites.[4] This loss of culture is a  
9 concern for Amazon indigenous communities, where every year people have less to do with  
10 traditional medical practices.[5] We were unable to confirm a decline or otherwise of initiation  
11 rituals from published sources in Colombia. Our research began with the express concern of  
12 community elders who, in the course of a decade long partnership with the traditional health  
13 systems group at Universidad del Rosario in Colombia, asked if loss of their cultural  
14 practices could affect women's reproductive health, particularly dysmenorrhoea.  
15  
16  
17

18 Cultural adaptation is less common in epidemiology than it is in some qualitative approaches,  
19 [6] yet intercultural epidemiology can be useful to identify potential health benefits of  
20 traditional health practices, many of which are being lost as globalization erodes indigenous  
21 cultures.  
22  
23

24 Problems related to women's reproductive cycle are increasing worldwide.[7-9] Western  
25 medicine has few satisfactory solutions to offer women with dysmenorrhoea, offering an  
26 interesting case in point as the World Health Organization calls to explore possible  
27 contributions of traditional medicine.[10,11] A sparse epidemiological literature addresses the  
28 links with dysmenorrhoea and cultural influences,[12, 13] ethnicity and religiosity.[14, 15]  
29 Better documented risk factors are diet, exercise, psychological or emotional episodes, and  
30 use of alcohol and tobacco.[16-20] We found no epidemiological studies of indigenous  
31 initiation rites and dysmenorrhoea. A retrospective survey using a questionnaire evaluated  
32 this possible association.  
33  
34  
35

## 36 METHODS

37  
38 **Study population:** All women over the age of 13 years living in the seven communities in  
39 Vaupés, who had experienced at least two menstruations (n=185), aged 13 to 88 years  
40 (mean 32,5; SD 15,6).  
41

42 **Outcome:** Interviewers asked if, during menstruation, women suffered pelvic pain, dizziness,  
43 headache, bodily pains, and problems in the days prior to menstruation. They did not specify  
44 a period of recall or a frequency of problems. They also asked about the interval between  
45 menstruation and duration of menstruation. The analysis rested on pelvic pain to define  
46 dysmenorrhoea.[21-23] The interviewer asked directly about pain and its severity, without  
47 asking about duration of pain, proportion of menstruations affected or activities that could not  
48 be completed due to the pain. Because pain perception is subjective, we used a well-  
49 established graphic approach showing faces with different grades of discomfort (Figure  
50  
51  
52  
53  
54  
55  
56  
57  
58  
59  
60

1  
2  
3  
4  
5  
6  
7  
8 1).[24] Respondents simply pointed to the face that reflected their experience during  
9 menstruation.  
10

11 **Exposure:** Initiation rites at the onset of menarche, lasting three to five days, during which  
12 time the young women reported one, several or all component rites: emesis, care during the  
13 ceremony, *carayurú* powder, isolation, prescribed diet, body paint with *we*, godmother, cut  
14 hair, inhaled *ají*, and blessed by traditional healer. The questionnaire documented exposure  
15 to each component rite (yes/no) separately. Without understanding the exact workings of the  
16 initiation rites, we followed the WHO guideline to handle component activities as a “black  
17 box”[25]: we do not always have to understand exactly how a traditional therapy works to  
18 measure its effect. We thus documented each of the individual rites.  
19

20 **Instrument:** A month of consultation with local healers (*payés*) clarified the main research  
21 question and a list of culturally appropriate questions. After approval of the questionnaire for  
22 semantic and cultural equivalence with the *payés*, the researchers piloted the questionnaire  
23 and pain images with 14 women of the same ethnic group living in Mitu (not part of the  
24 study), they reported pain using the graphic approach showing faces with different grades of  
25 discomfort. The authorities in each community invited all women – by cultural definition, the  
26 first menstruation identifies the woman as an adult -- to the communal hall (*maloka*) where  
27 the researchers explained the instrument, issues of confidentiality and the right to decline to  
28 participate or to leave out any question. No eligible woman declined to participate.  
29 Interviewers administered a 37-question instrument through a translator during December  
30 2008.  
31

32 **Analysis:** Epi-data 3.1 served for manual data capture analysis relied on CIETmap 2.0 beta  
33 8 (Centro de Investigación de Enfermedades Tropicales, Mexico), public domain software  
34 that provides a Windows-like interface with R. Bivariate analysis with each of the 10  
35 component activities examined the relationship of each component rite on its own with  
36 dysmenorrhoea. We also analysed complete and incomplete initiation using sequential  
37 stratification by age of the woman, community of origin (some had more access to Western  
38 ways), education, parity, family planning and menopause. We analysed trend using the  
39 Mantel extension of the Mantel-Haenszel test.[26] We report results as adjusted odds ratios  
40 (aOR) with 95% confidence intervals. The two-tailed Fisher exact test served for estimation  
41 of confidence with the resulting sparse numbers comparisons.  
42

43 Without any prior basis for weighting importance of different activities in the initiation, we  
44 calculated the average effect across the ten components as though each was a separate  
45  
46  
47  
48  
49  
50  
51  
52  
53  
54  
55  
56  
57  
58  
59  
60



1  
2  
3  
4  
5  
6  
7  
8 exposure; this relied on Meta, an R program. A Forest plot summarises this (Figure 2).  
9 Compared with occurrence among women who completed all ten rites of initiation, a  
10 sensitivity analysis dropped each initiation rite in turn to test relevance of each in initiation.  
11

12 **Control of biases:** Involvement of healers and elders in the design guaranteed cultural fit.  
13 The questionnaire inquired for current family planning, and if so, which is the method used  
14 (plants, pill, injection, condom, pessary, surgery, partner-managed contraception), and  
15 duration of use of each method, as this could affect dysmenorrhoea; hormonal pills can  
16 diminish pain and IUDs can increase pain. Use of Western contraceptive methods also  
17 coincides with Western acculturation. We stratified by contraceptive use to separate between  
18 the effect of the contraceptive and the initiation rites. To avoid an acculturation bias from  
19 interviewing only women who did not go to nearby towns for work, we conducted the study in  
20 December when most return to their homes. We took age, menopause and education into  
21 account by stratification to limit the differential influence of these on responses.  
22

23 **Ethical aspects:** The CIET ethical review committee at the Universidad Autónoma de  
24 Guerrero and Research Fund at the Universidad del Rosario in Colombia both approved the  
25 proposal. The leadership of each community signed formal agreements for data  
26 management and sharing with all participants present, after the researchers had explained to  
27 all the nature of the study, how data would be used, confidentiality, and rights to decline  
28 participation.[27]  
29  
30  
31  
32  
33  
34  
35

## 36 RESULTS

37  
38 A total of 185 women participated, representing 70.6% of the 262 women over the age of 12  
39 years identified in the 2006 census. The 77 women excluded had either migrated from the  
40 area or they had not completed two menstruations. Of 158 women who knew their age in  
41 years, the average was 32.5 years (mode 19 years, SD 15.6). Respondents reported low  
42 levels of education, 28.3% (52/184) with no schooling and only 17.4% (32/184 women  
43 interviewed) with secondary education. Few used family planning (11.1% based on 15/135  
44 women of reproductive age) with an average of 4.9 children each (SD 2.7).  
45  
46  
47

48 Table 1: Characteristics of the women included in the sample

| Variable        | Yes |      | No  |        | Total |
|-----------------|-----|------|-----|--------|-------|
| Mixed ethnicity | 0   | 0.0% | 185 | 100.0% | 185   |

|                                    |     |       |     |       |     |
|------------------------------------|-----|-------|-----|-------|-----|
| Born in this community             | 94  | 51.4% | 89  | 48.6% | 183 |
| Knew her age                       | 158 | 85.4% | 27  | 14.6% | 185 |
| Menopausal                         | 50  | 27.0% | 135 | 73.0% | 185 |
| Had had children                   | 139 | 75.1% | 46  | 24.9% | 185 |
| Using contraceptive methods        | 15  | 11.1% | 120 | 88.9% | 135 |
| Using contraceptive pills          | 0   | 0.0%  | -   | -     | -   |
| Using IUDs                         | 2   | 13.3% | -   | -     | -   |
| Using plants                       | 1   | 6.7%  | -   | -     | -   |
| Tubal ligation                     | 4   | 26.7% | -   | -     | -   |
| Using other methods                | 8   | 53.3% | -   | -     | -   |
| Any education level                | 133 | 71.9% | 52  | 28.1% | 185 |
| Lives in a community with airstrip | 118 | 65.2% | 63  | 34.8% | 181 |
| Reported dysmenorrhoea             | 97  | 52.4% | 88  | 47.6% | 185 |
| Rites completion                   |     |       |     |       |     |
| All rites completed                | 32  | 17.3% | 153 | 82.7% | 185 |
| No rites at all                    | 14  | 7.6%  | 171 | 92.4% | 185 |
| Incomplete rite                    | 139 | 75.1% | 46  | 24.9% | 185 |

The average age of menarche was 13.8 years (SD 1.16). Some 52% (97/185) reported dysmenorrhoea and 88.6% (164/185) reported undergoing at least some rite of initiation during menarche. Table 2 shows the proportion involved in each of ten activities identified by traditional healers as the initiation rites. Considering each rite separately, only emesis retained a significant association on its own with dysmenorrhoea, after taking into account age of the woman, community of origin (some had more access to Western ways), parity, family planning by sequential stratification and adjusting for menopause and education. The Forest plot (Figure 2) shows dysmenorrhoea associated with each component rite compared with women who did no rites. The average effect size was OR 1.66 (95%CI 1.35-2.04).

Table 2: Exposure to different aspects of initiation rite and risk of dysmenorrhoea (odds ratio)

| Initiation rite                | % of all women receiving this rite** | Risk of dysmenorrhoea in each subgroup |                    |       |           |
|--------------------------------|--------------------------------------|----------------------------------------|--------------------|-------|-----------|
|                                |                                      | Receiving rite                         | Not receiving rite | aOR*  | 95% CI    |
| Emesis                         | 38.4%                                | 27/71                                  | 70/114             | 0.39* | 0.21 0.7  |
| Cared for during the ceremony  | 76.8%                                | 69/142                                 | 28/43              | 0.51  | 0.25 1.02 |
| Applied <i>carayurú</i> powder | 84.3%                                | 78/156                                 | 19/29              | 0.53  | 0.23 1.19 |
| Spent time in isolation        | 71.9%                                | 64/133                                 | 33/52              | 0.53  | 0.28 1.03 |
| Followed prescribed diet       | 71.9%                                | 64/133                                 | 33/52              | 0.53  | 0.28 1.03 |
| Body painted with <i>we</i>    | 50.8%                                | 44/94                                  | 53/91              | 0.63  | 0.35 1.12 |
| Had a godmother                | 50.8%                                | 45/94                                  | 50/88              | 0.7   | 0.39 1.25 |
| Cut hair                       | 68.6%                                | 64/127                                 | 33/58              | 0.77  | 0.41 1.45 |
| Inhaled <i>aji</i>             | 49.2%                                | 45/91                                  | 52/94              | 0.79  | 0.44 1.41 |
| Blessed by traditional healer  | 88.6%                                | 85/164                                 | 12/21              | 0.81  | 0.32 2.04 |

\* Adjusted for age and level of education in a stratified analysis.

\*\* Total 185 women; no missing data

To test the role of each rite in relation to dysmenorrhoea, a sensitivity analysis compared dysmenorrhoea rates among women who did all ten rites (n=32) with women who participated in less than the ten, dropping each rite in turn. Figure 3 shows the unadjusted odds of dysmenorrhoea for all rites compared with failing to do specific rites, and those who did no rites. Those who completed the 10 rites (8/32) contrasted sharply with those who completed some or no rites (89/153) (p-Fisher 0.001).

Table 3: Sensitivity analysis of initiation rites and dysmenorrhoea contrasting women who completed all rites and those who completed only one component rite.

|                                | n   | Frequencies |      |         |      | Risk of dysmenorrhoea |          |            |       |
|--------------------------------|-----|-------------|------|---------|------|-----------------------|----------|------------|-------|
|                                |     | No          | Yes  | p-value | OR   | 95% CI                | p-Fisher |            |       |
| None                           | 46  | 14          | 30,4 | 32      | 69,6 | 0.001                 | 7,5      | 1,95-28,7  | 0.001 |
| Emesis                         | 71  | 39          | 54,9 | 32      | 45,1 | 0.001                 | 2,85     | 1,04-7,82  | 0.050 |
| Cared for during the ceremony  | 142 | 110         | 77,5 | 32      | 22,5 | 0.001                 | 3,73     | 1,59-8,78  | 0.001 |
| Followed prescribed diet       | 133 | 101         | 75,9 | 32      | 24,1 | 0.001                 | 3,73     | 1,58-8,85  | 0.001 |
| Spent time in isolation        | 133 | 101         | 75,9 | 32      | 24,1 | 0.001                 | 3,73     | 1,58-8,85  | 0.001 |
| Applied <i>carayurú</i> powder | 156 | 124         | 79,5 | 32      | 20,5 | 0.001                 | 3,89     | 1,68-9,02  | 0.001 |
| Blessed by traditional healer  | 164 | 132         | 80,5 | 32      | 19,5 | 0.001                 | 4,20     | 1,83-9,66  | 0.001 |
| Body painted with <i>we</i>    | 94  | 62          | 66,0 | 32      | 34,0 | 0.001                 | 4,15     | 1,65-10,4  | 0.001 |
| Cut hair                       | 127 | 95          | 74,8 | 32      | 25,8 | 0.001                 | 4,31     | 1,81-10,2  | 0.001 |
| Had a godmother                | 94  | 62          | 66,0 | 32      | 34,0 | 0.001                 | 4,44     | 1,77-11,1  | 0.001 |
| Inhaled <i>aji</i>             | 91  | 59          | 64,8 | 32      | 35,2 | 0.001                 | 5,05     | 1,99-12,77 | 0.001 |

Most respondents with dysmenorrhoea (92/97) reported severity using the Wong-Baker Faces Pain Rating Scale. Table 4 shows a statistically significant increase across five levels of severity for those who completed all rites compared with those who did any or no rites ( $p=0.0014$ ). It also contrasts those who did no rites with those who completed all rites ( $p=0.0039$ ).

Table 4: Completion of initiation rites and reported intensity of dysmenorrhoea

|                                                           | No dysmenorrhoea | Intensity of dysmenorrhoea |              |              |              |
|-----------------------------------------------------------|------------------|----------------------------|--------------|--------------|--------------|
|                                                           |                  | 0                          | 1            | 2            | 3            |
| <b>Incomplete or no rites</b>                             | 64               | 18                         | 20           | 19           | 27           |
| <b>All rites completed</b>                                | 24               | 2                          | 4            | 1            | 1            |
| <b>Total</b>                                              | 88               | 20                         | 24           | 20           | 28           |
| <b>OR</b>                                                 |                  | 3.94                       | 3.49         | 6.76         | 6.92         |
| <b>95%CI</b>                                              |                  | 1.72 - 9.00                | 1.41 - 8.64  | 1.84 - 24.93 | 1.17 - 40.88 |
| Mantel-Haenszel chi square for trend = 10.16 $p = 0.0014$ |                  |                            |              |              |              |
| <b>No rites at all</b>                                    | 4                | 1                          | 3            | 3            | 2            |
| <b>All rites completed</b>                                | 24               | 2                          | 4            | 1            | 1            |
| <b>Total</b>                                              | 28               | 3                          | 7            | 4            | 3            |
| <b>OR</b>                                                 |                  | 6.75                       | 6.93         | 9.38         | 5.64         |
| <b>IC 95%</b>                                             |                  | 1.72 - 26.42               | 1.77 - 27.17 | 1.82 - 48.41 | 0.57 - 55.87 |
| <b>P-Fisher</b>                                           |                  | 0.01                       | 0.01         | 0.02         | 0.2          |
| Mantel-Haenszel chi square for trend = 8.33; $p = 0.0039$ |                  |                            |              |              |              |

## DISCUSSION

~~Our results show that women who reported having no initiation rite were more likely to report dysmenorrhoea than women who said they had such a rite. Our results support the idea that abandoning traditional initiation rites, or adopting practices that go along with abandoning these rites, is a risk factor for dysmenorrhoea.~~ Emesis was the single strongest protective rite on its own, but sensitivity analysis showed a consistent effect of the other rites for those who

**Comment [ISC1]:** Richard Sands:

We suggest:

"Our results show that women who reported having no initiation rite were more likely to report dysmenorrhoea than women who said they had such a rite."

>>Done

1  
2  
3  
4  
5  
6  
7  
8 did not abandon the initiation practices. The apparent lack of specific effects of each  
9 component rite supports the idea that synergy between all components completes the  
10 protective effect.  
11

12 The average age of menarche of our sample was higher than typically reported in the  
13 literature,[28-33] possibly indicating a relatively low level of secular change.[34,35] That one  
14 half of the women reported dysmenorrhoea (97/185) is lower than reported in international  
15 studies.[36-40] Although the local definition (facial expressions) was useful for internal  
16 comparisons, it is of limited value in international comparisons.  
17

18 This study faced several common challenges in inter-cultural epidemiology. Even with all  
19 eligible women participating, the small numbers problem is well recognised and has no easy  
20 solution.[41,42] As anticipated, we found it difficult to untangle issues like use of  
21 contraceptives and reporting of age, given the effect of acculturation on these. Despite this  
22 interdependence of exposures, we believe we were able to show an independent effect of  
23 initiation rites.  
24

25 Cultural issues probably reduced the effectiveness of the study and reduced the numbers  
26 further. The 14.6% (27/185) of women who could not give their age in calendar years is  
27 testimony to their distance from Western culture. Analysing only those who mention an age  
28 included a cultural filter, limiting our conclusions to those with some measure of Western  
29 acculturation. Recall bias might have affected the results as some women had to remember  
30 rites that took place decades earlier; a social desirability bias (not wanting to be culturally  
31 different, wanting to avoid disapproval) might also have influenced the results. We have no  
32 additional information to clarify the directions of these biases.  
33

34 Within these constraints and the stringent limits imposed by our population size, we tried to  
35 take account of other acculturation issues, beyond initiation rites, by stratifying for education,  
36 age, parity, community of residence (some had greater access to modern towns) and use of  
37 family planning. The lower risk associated with initiation rites might still be due to  
38 unmeasured lifestyle issues associated with maintaining initiation rites. Solving this issue  
39 may require a randomised controlled trial where the differential support for the fulfilment of  
40 the rite among communities be contrasted with the occurrence of dysmenorrhoea. One  
41 problem with prospective studies in this setting is that it would take many years to  
42 accumulate the numbers necessary to make the case.  
43

44 Since the 1950s, public health programmes have contemplated primary, secondary and  
45  
46  
47  
48  
49  
50  
51  
52  
53  
54  
55  
56  
57  
58  
59  
60

1  
2  
3  
4  
5  
6  
7  
8  
9  
10  
11  
12  
13  
14  
15  
16  
17  
18  
19  
20  
21  
22  
23  
24  
25  
26  
27  
28  
29  
30  
31  
32  
33  
34  
35  
36  
37  
38  
39  
40  
41  
42  
43  
44  
45  
46  
47  
48  
49  
50  
51  
52  
53  
54  
55  
56  
57  
58  
59  
60

tertiary prevention. More recently, *primordial prevention* identified social, economic and cultural patterns that affect risks.[43] Within its limitations, our study is compatible with the idea that primary or primordial prevention of dysmenorrhoea might be possible for indigenous women who are increasingly in contact with Western ways.

## CONCLUSIONS

Without adding insight into exact mechanisms, this cross-sectional study shows an association between abandoning initiation rites and dysmenorrhoea. No one of the rites on its own explains this association.

Inter-cultural approaches have received little attention in the epidemiological literature, and these need further investment. In this study, the indigenous leaders of the seven communities requested the study and set the research question; they specified the cultural exposures of interest; they participated in the design and testing of instruments; they led interpretation of results; and they are the primary research users, sharing the results with their communities in support of traditional health practices.

Without underestimating the remaining intercultural challenges, the difficulties of research in small populations and the limits of observational studies, we feel this study achieves a first step in culturally safe descriptive epidemiology of traditional medicine: a longer term dialogue led to the research question and design; the indigenous leaders defined the exposure of interest; the ethical review process fitted with indigenous ethical concepts; it showed an association between self reported participation in initiation rites and dysmenorrhea ~~generated evidence suggesting an effective traditional practice, without understanding how this works.~~

**Comment [ISC2]:** Richard Sands:

We suggest:

"it showed an association between self reported participation in initiation rites and dysmenorrhea"

>>Done

## ACKNOWLEDGMENTS

Field work was financed by The Research Fund of Universidad del Rosario. Benedicto Mejía and Efraín Mejía, along with other *payés* (wise men, healers) from the seven communities participated in formulation of research questions, design, application of the instrument and interpretation of results. Alicia Jaramillo and Guillermina Ferrer translated the questions during the application of the instrument. Carolina Amaya and Natalia Reinoso carried out the pilot study and the research instrument application in the seven communities. Iván Sarmiento helped with data analysis, tables and figures elaboration and revision of citations and bibliographic references. Andrés Cañón and Sebastián Luna collaborated with the systematic review of cultural risk factors for dysmenorrhea.

## COMPETING INTERESTS

We, the authors, declare that there are no conflicts of interest in this study regarding the Indigenous communities that took part, the recognised rights of the Indigenous Peoples, or the financing institutions.

## FUNDING

Fieldwork was financed by The Research Fund of Universidad del Rosario. Germán Zuluaga, MD, MSc carried out the research project as part fulfilment of the requirements of MSc (Epidemiology) at the Universidad Autónoma de Guerrero.

## FIGURE LEGENDS

Figure 1: Wong-Baker Faces Pain Rating Scale

Figure 2: Forest plot of individual initiation rites and risk of dysmenorrhoea

Figure 3: Sensitivity analysis compared dysmenorrhoea risk among women who did all ten rites (n=32) compared with women who did not do at least one rite, and those who did no rite (listing shows excluded rites)

## REFERENCES

---

1. Dirección de Etnias del Ministerio del Interior y de Justicia. *Resolución no. 0006 de 26 de enero de 2005, por medio de la cual se inscribe en el registro de asociaciones de autoridades tradicionales y/o cabildos la constitución de la asociación de autoridades tradicionales indígenas de la zona de Yapú - ASATRIZY*. Bogotá (CO): Min. Int. Just, 2005.
2. Sarmiento I, Amaya C. *Plan de vida: unidos con un solo pensamiento para vivir bien*. Asociación de Autoridades Tradicionales Indígenas de la Zona de Yapú. Bogota, Colombia 2008.
3. Sarmiento I, Amaya C. Asociación de Autoridades Tradicionales Indígenas de la Zona de Yapú. *Historia y origen del proceso de un Nuevo despertar*. Bogotá, Colombia, 2008.
4. Rembeck GI, Gunnarsson RK. Improving pre- and postmenarcheal 12-year-old girls' attitudes toward menstruation. *Health Care Women Int*. 2004;**25**:680-98.
5. Piñeros-Petersen M, Ruiz-Salguero M. Aspectos demográficos en comunidades indígenas de tres regiones de Colombia. *Salud Pública Mex* 1998;**40**:324-329.
6. Cameron M, Andersson N, and Ledogar RJ. Culturally safe epidemiology: oxymoron or scientific imperative. *Pimatisiwin: Journal of Aboriginal and Indigenous Community Health* 2010;**8**(2):89-116.
7. World Health Organization. *Engaging for Health. □11th General Program of Work 2006-2015, a Global Health Agenda*. Geneva (CH): WHO, 2006. (Working paper GPW/2006-2015). Available at: [http://whqlibdoc.who.int/publications/2006/GPW\\_eng.pdf](http://whqlibdoc.who.int/publications/2006/GPW_eng.pdf). Accessed October 15, 2008.
8. Rodríguez J. *Descripción de la mortalidad por departamentos: Colombia año 2000*. Bogotá (CO): Pontificia Universidad Javeriana, Cendex. (Working Paper ASS /DT 016-05). Available at: <http://www.cendex.org.co/pdf/DT016-05.pdf>. Accessed January 15, 2008.
9. García-Pérez H, Harlow SD, Erdmann CA, Denman C. Pelvic pain and associated characteristics among women in northern Mexico. *Int Perspect Sex Reprod Health*. 2010;**36**:90-8.
10. World Health Organization. *Traditional Medicine and Health Coverage*. Geneva: WHO,



1  
2  
3  
4  
5  
6  
7  
8 1983.  
9

10 11. World Health Organization. *WHO Traditional Medicine Strategy: 2002-2005*. Geneva,  
11 (CH): WHO, 2002.  
12

13 12. Garg S, Sharma N, Sahay R. Socio-cultural aspects of menstruation in an urban slum in  
14 Delhi, India. *Reprod Health Matters* 2001;**9**:16-25.  
15

16 13. Avasarala AK, Panchangam S. Dysmenorrhoea in different settings: are the rural and  
17 urban adolescent girls perceiving and managing the dysmenorrhoea problem differently?  
18 *Indian J Community Med* 2008;**33**:246-249.  
19

20 14. Goldstein-Ferber S, Granot M. The association between somatization and perceived  
21 ability: roles in dysmenorrhea among israeli arab adolescents. *Psychosom Med*  
22 2006;**68**:136-142.  
23

24 15. Marván ML, Vacio A, García-Yañez G, *et al*. Attitudes toward menarche among Mexican  
25 pre-adolescents. *Women Health* 2007;**46**:7-23.  
26

27 16. Latthe P, Mignini L, Gray R, *et al*. Factors predisposing women to chronic pelvic pain:  
28 systematic review. *BMJ* 2006;**332**:749-755.  
29

30 17. Patel A, Tanksale V, Sahasrabhojane M, *et al*. The burden and determinants of  
31 dysmenorrhoea: a population-based survey of 2262 women in Goa, India. *BJOG*  
32 2006;**113**:453-463.  
33

34 18. Balbi C, Musone R, Menditto A, *et al*. Influence of menstrual factors and dietary habits on  
35 menstrual pain in adolescence age. *Eur J Obstet Gynecol Reprod Biol* 2000;**91**:143-148.  
36

37 19. Proctor ML, Murphy PA. Herbal and dietary therapies for primary and secondary  
38 dysmenorrhoea. *Cochrane Database Syst Rev* 2001;**(3)**:CD002124.  
39

40 20. Parazzini F, Tozzi L, Mezzopane R, *et al*. Cigarette smoking, alcohol consumption, and  
41 risk of primary dysmenorrhea. *Epidemiology* 1994;**5**:469-472.  
42

43 21. Mazza D. *Women's Health in General Practice*. Oxford: Butterworth Heinemann, 2004.  
44

45 22. Deb Sh, Raine-Fenning N. Dysmenorrhoea. *Obstetrics, Gynaecology and Reproductive*  
46 *Medicine* 2008;**18**:294-299.  
47

48 23. Dawood MY. Primary dysmenorrhoea: advances in pathogenesis and management.  
49  
50  
51  
52  
53  
54  
55  
56  
57  
58  
59  
60

1  
2  
3  
4  
5  
6  
7  
8 *Obstet Gynecol* 2006;**108**:428-441.

9  
10 24. Wong D, Whaley L. *Clinical handbook of pediatric nursing*. 2nd ed. Saint Louis (MO):  
11 Mosby Company, 1986. Quoted by: National Institutes of Health, NIH Pain Consortium. Pain  
12 intensity scales – Wong-Baker faces pain rating scale [NIH Pain Consortium Web site]. July  
13 17, 2007. [http://painconsortium.nih.gov/pain\\_scales/Wong-Baker\\_Faces.pdf](http://painconsortium.nih.gov/pain_scales/Wong-Baker_Faces.pdf) (accessed 24  
14 April 2012).

15  
16  
17 25. World Health Organization. *General Guidelines for Methodologies on Research and*  
18 *Evaluation of Traditional Medicine*. Geneva (CH): WHO, 2000. (Working paper  
19 WHO/EDM/TRM/2000.1)

20  
21 26. Leuraud K, Benichou J: Tests for monotonic trend from case control data: Cochran-  
22 Armitage-Mantel trend test, isotonic regression and single and multiple contrast tests.  
23 *Biometrical Journal* 2004;**46**:731-749

24  
25 27. Grupo de Estudios en Sistemas Tradicionales de Salud. Principios éticos para estudios  
26 médicos aplicados a los sistemas tradicionales de salud 2008.  
27 [http://www.cemi.org.co/images/PRINCIPIOS\\_ETICOS\\_GESTS\\_CEMI.pdf](http://www.cemi.org.co/images/PRINCIPIOS_ETICOS_GESTS_CEMI.pdf) (accessed 14 Jun  
28 2010).

29  
30 28. Vera Y, Hidalgo G, Gollo O, *et al*. Edad de la menarquia y su relación con el estrato social  
31 en cinco estados venezolanos. *Acta Cient Estud* 2009;**7**:130-135.

32  
33 29. Ulate G. Edad de la menarquia en el Valle Central de Costa Rica y factores asociados a  
34 su aparición. *Rev Costarric Cienc Med* 1995;**16**:37-41.

35  
36 30. Fonseca J, Aguilar O. Edad de la Menarquia en San Pedro Sula. *Rev Med Hondur*  
37 1991;**59**: 4-7.

38  
39 31. Hernández I, Unanue N, Gaete X, *et al*. Edad de la menarquia y su relación con el nivel  
40 socioeconómico e índice de masa corporal. *Rev Med Chil* 2007;**135**:1429-1436.

41  
42 32. Sharma N, Vaid S, Manhas A. Age at menarche in two caste groups (brahmins and  
43 rajputs) from rural areas of Jammu. *Anthropologist* 2006;**8**:55-7.

44  
45 33. Romans SE, Martin JM, Gendall K, *et al*. Age of menarche: the role of some psychosocial  
46 factors. *Psychol Med* 2003;**33**:933–939.

47  
48 34. Padez C. Social background and age at menarche in portuguese university students: a  
49  
50  
51  
52  
53  
54  
55  
56  
57  
58  
59  
60

1  
2  
3  
4  
5  
6  
7  
8 note on the secular changes in Portugal. *Am J Hum Biol* 2003;**15**:415-427.

9  
10 35. Tanner JM. *Growth at Adolescence*. 2nd ed. Oxford: Blackwell, 1962. Quoted by: Korah  
11 L. Knowledge and perceptions regarding menstruation among adolescent girls: a research  
12 study. *Nurs J India* 1991;**82**:205-209.

13  
14 36. Woods NF, Most A, Dery GK. Prevalence of perimenstrual symptoms. *Am J Public Health*  
15 1982;**72**:1257-1264.

16  
17 37. Klein JR, Litt IF. Epidemiology of adolescent dysmenorrhea. *Pediatrics* 1981;**68**:661-664.

18  
19 38. Wilson CA, Keye WRJ. A survey of adolescent dysmenorrhea and premenstrual  
20 symptom frequency, a model program for prevention, detection, and treatment. *J Adolesc*  
21 *Health Care*. 1989;**10**:317-322.

22  
23 39. Jamieson D, Steege J. Prevalence of dysmenorrhoea, dyspareunia, pelvic pain and  
24 irritable bowle syndrome in primary care practices. *Obstet Gynecol* 1996;**87**:55-58.

25  
26 40. Latthe P, Latthe M, Say L, *et al*. WHO systematic review of prevalence of chronic pelvic  
27 pain: a neglected reproductive health morbidity. *BMC Public Health* 2006;**6**:177.

28  
29 41. Andresen EM, Diehr PH, Luke DA. Public health surveillance of low-frequency  
30 populations. *Annu Rev Public Health* 2004;**25**:25-52.

31  
32 42. Monasta L, Andersson N, Ledogar RJ, *et al*. Minority health and small numbers  
33 epidemiology: a case study of living conditions and health of children in five foreign Roma  
34 camps in Italy. *Am J Public Health* 2008;**98**:2035-2041.

35  
36 43. Bonita R, Beaglehole R, Kjellström T, Basic Epidemiology, Second Edition World Health  
37 Organization, Geneva 2006 p103  
38  
39  
40  
41  
42  
43  
44  
45  
46  
47  
48  
49  
50  
51  
52  
53  
54  
55  
56  
57  
58  
59  
60

1  
2  
3  
4  
5  
6  
7  
8  
9  
10  
11  
12  
13  
14  
15  
16  
17  
18  
19  
20  
21  
22  
23  
24  
25  
26  
27  
28  
29  
30  
31  
32  
33  
34  
35  
36  
37  
38  
39  
40  
41  
42  
43  
44  
45  
46  
47  
48  
49  
50  
51  
52  
53  
54  
55  
56  
57  
58  
59  
60



Wong-Baker Faces Pain Rating Scale  
180x59mm (300 x 300 DPI)

peer review only



Forest plot of individual initiation rites and risk of dysmenorrhoea  
180x114mm (300 x 300 DPI)

Review only

1  
2  
3  
4  
5  
6  
7  
8  
9  
10  
11  
12  
13  
14  
15  
16  
17  
18  
19  
20  
21  
22  
23  
24  
25  
26  
27  
28  
29  
30  
31  
32  
33  
34  
35  
36  
37  
38  
39  
40  
41  
42  
43  
44  
45  
46  
47  
48  
49  
50  
51  
52  
53  
54  
55  
56  
57  
58  
59  
60

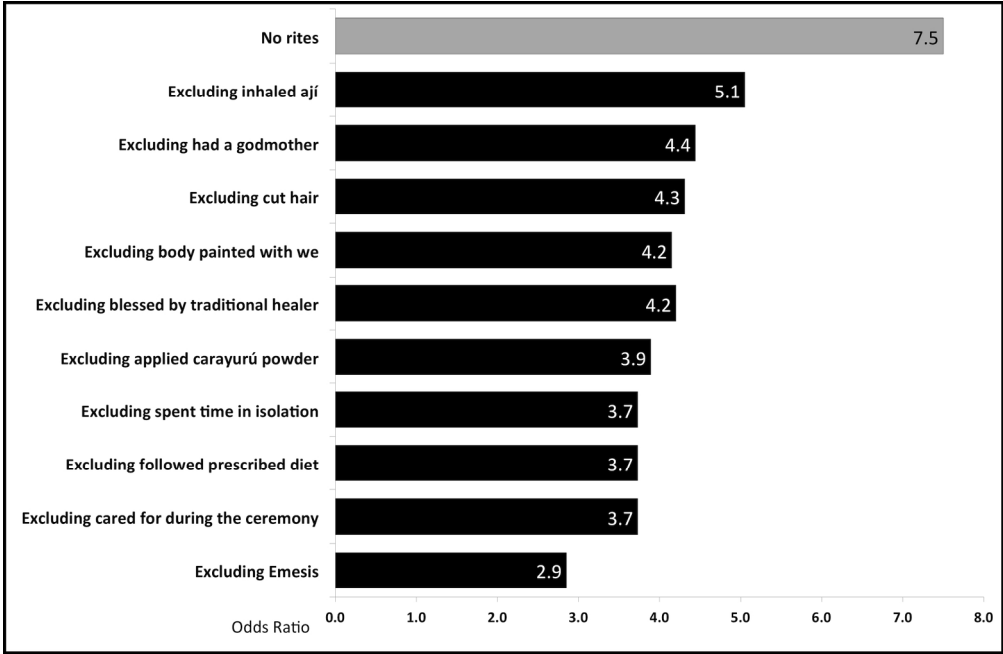

Sensitivity analysis compared dysmenorrhoea risk among women who did all ten rites (n=32) compared with women who did not do at least one rite, and those who did no rite (listing shows excluded rites)  
180x117mm (300 x 300 DPI)

STROBE 2007 (v4) Statement—Checklist of items that should be included in reports of *cross-sectional studies*

| Section/Topic            | Item # | Recommendation                                                                                                                                                                       | Reported on page #                                                       |
|--------------------------|--------|--------------------------------------------------------------------------------------------------------------------------------------------------------------------------------------|--------------------------------------------------------------------------|
| Title and abstract       | 1      | (a) Indicate the study's design with a commonly used term in the title or the abstract                                                                                               | "Cross-sectional studies" appears in title                               |
|                          |        | (b) Provide in the abstract an informative and balanced summary of what was done and what was found                                                                                  | Structured abstract provided                                             |
| <b>Introduction</b>      |        |                                                                                                                                                                                      |                                                                          |
| Background/rationale     | 2      | Explain the scientific background and rationale for the investigation being reported                                                                                                 | Abstract and para 1 and 3 of introduction (p3)                           |
| Objectives               | 3      | State specific objectives, including any prespecified hypotheses                                                                                                                     | Abstract and para 2 Introduction (p3)                                    |
| <b>Methods</b>           |        |                                                                                                                                                                                      |                                                                          |
| Study design             | 4      | Present key elements of study design early in the paper                                                                                                                              | Abstract, paras 1 and 3 of Introduction (p1), para 3 of Discussion (p11) |
| Setting                  | 5      | Describe the setting, locations, and relevant dates, including periods of recruitment, exposure, follow-up, and data collection                                                      | Methods (p3 and p4)                                                      |
| Participants             | 6      | (a) Give the eligibility criteria, and the sources and methods of selection of participants                                                                                          | First para of Methods, p3                                                |
| Variables                | 7      | Clearly define all outcomes, exposures, predictors, potential confounders, and effect modifiers. Give diagnostic criteria, if applicable                                             | Paras 2-3 of Methods (p4), and para 2 of Discussion (p10)                |
| Data sources/measurement | 8*     | For each variable of interest, give sources of data and details of methods of assessment (measurement). Describe comparability of assessment methods if there is more than one group | Paras 2-3 of Methods (p4)                                                |
| Bias                     | 9      | Describe any efforts to address potential sources of bias                                                                                                                            | Para 7 of Methods (p5)                                                   |
| Study size               | 10     | Explain how the study size was arrived at                                                                                                                                            | Para 3 of Discussion (p10), all available women were included.           |

|                        |     |                                                                                                                                                                                                              |                                                                                          |
|------------------------|-----|--------------------------------------------------------------------------------------------------------------------------------------------------------------------------------------------------------------|------------------------------------------------------------------------------------------|
| Quantitative variables | 11  | Explain how quantitative variables were handled in the analyses. If applicable, describe which groupings were chosen and why                                                                                 | Abstract, paras 2, 3, 5, 6 of Methods (p4 and p5), para 5 Discussion (p10)               |
| Statistical methods    | 12  | (a) Describe all statistical methods, including those used to control for confounding                                                                                                                        | Paras 5-6 of Methods (p5)                                                                |
|                        |     | (b) Describe any methods used to examine subgroups and interactions                                                                                                                                          | Para 5 of Discussion (p10)                                                               |
|                        |     | (c) Explain how missing data were addressed                                                                                                                                                                  | Para 2 of Results (p7)                                                                   |
|                        |     | (d) If applicable, describe analytical methods taking account of sampling strategy                                                                                                                           | Paras 5-6 of Methods (p5)                                                                |
|                        |     | (e) Describe any sensitivity analyses                                                                                                                                                                        | Para 3 of Results (Figure 3 and Table 3) (p8)                                            |
| <b>Results</b>         |     |                                                                                                                                                                                                              |                                                                                          |
| Participants           | 13* | (a) Report numbers of individuals at each stage of study—eg numbers potentially eligible, examined for eligibility, confirmed eligible, included in the study, completing follow-up, and analysed            | Para 1 of Results (p6), para 1 of methods (p4)                                           |
|                        |     | (b) Give reasons for non-participation at each stage                                                                                                                                                         | Para 1 of Results (p6)                                                                   |
|                        |     | (c) Consider use of a flow diagram                                                                                                                                                                           | Not applicable                                                                           |
| Descriptive data       | 14* | (a) Give characteristics of study participants (eg demographic, clinical, social) and information on exposures and potential confounders                                                                     | Para 2 of Introduction (p3), para 1 of Methods (p4), para 1 of Results (p6), and Table 1 |
|                        |     | (b) Indicate number of participants with missing data for each variable of interest                                                                                                                          | Para 1 of Results (p6)                                                                   |
| Outcome data           | 15* | Report numbers of outcome events or summary measures                                                                                                                                                         | Para 2-5 of Results (p6 and p7)                                                          |
| Main results           | 16  | (a) Give unadjusted estimates and, if applicable, confounder-adjusted estimates and their precision (eg, 95% confidence interval). Make clear which confounders were adjusted for and why they were included | Tables 2, 3 and 4                                                                        |
|                        |     | (b) Report category boundaries when continuous variables were categorized                                                                                                                                    | Tables 2 and 4                                                                           |
|                        |     | (c) If relevant, consider translating estimates of relative risk into absolute risk for a meaningful time period                                                                                             | Not Applicable                                                                           |
| Other analyses         | 17  | Report other analyses done—eg analyses of subgroups and interactions, and sensitivity analyses                                                                                                               | Table 3 and 4 and Figure 2                                                               |
| <b>Discussion</b>      |     |                                                                                                                                                                                                              |                                                                                          |
| Key results            | 18  | Summarise key results with reference to study objectives                                                                                                                                                     | Paras 2, 4, 5 of Results (p6 and p7), para 5 of Discussion (p10)                         |



|                          |    |                                                                                                                                                                            |                                                                                                        |
|--------------------------|----|----------------------------------------------------------------------------------------------------------------------------------------------------------------------------|--------------------------------------------------------------------------------------------------------|
| Limitations              | 19 | Discuss limitations of the study, taking into account sources of potential bias or imprecision. Discuss both direction and magnitude of any potential bias                 | Abstract, para 1 of Introduction (p3), para 7 of Methods (p6), paras 1 to 5 of Discussion (p9 and p10) |
| Interpretation           | 20 | Give a cautious overall interpretation of results considering objectives, limitations, multiplicity of analyses, results from similar studies, and other relevant evidence | Abstract and Discussion                                                                                |
| Generalisability         | 21 | Discuss the generalisability (external validity) of the study results                                                                                                      | Paras 2, 3, 5 and 7 of Discussion (p10)                                                                |
| <b>Other information</b> |    |                                                                                                                                                                            |                                                                                                        |
| Funding                  | 22 | Give the source of funding and the role of the funders for the present study and, if applicable, for the original study on which the present article is based              | P12                                                                                                    |

\*Give information separately for cases and controls in case-control studies and, if applicable, for exposed and unexposed groups in cohort and cross-sectional studies.

**Note:** An Explanation and Elaboration article discusses each checklist item and gives methodological background and published examples of transparent reporting. The STROBE checklist is best used in conjunction with this article (freely available on the Web sites of PLoS Medicine at <http://www.plosmedicine.org/>, Annals of Internal Medicine at <http://www.annals.org/>, and Epidemiology at <http://www.epidem.com/>). Information on the STROBE Initiative is available at [www.strobe-statement.org](http://www.strobe-statement.org).
